# Supplementary material for: Weak correlation between sequence conservation in promoter regions and in protein-coding regions of human-mouse orthologous gene pairs
Source: PubMed Central journal article supplement (PMC2335122; doi:10.1186/1471-2164-9-152), 2008-04-02

A

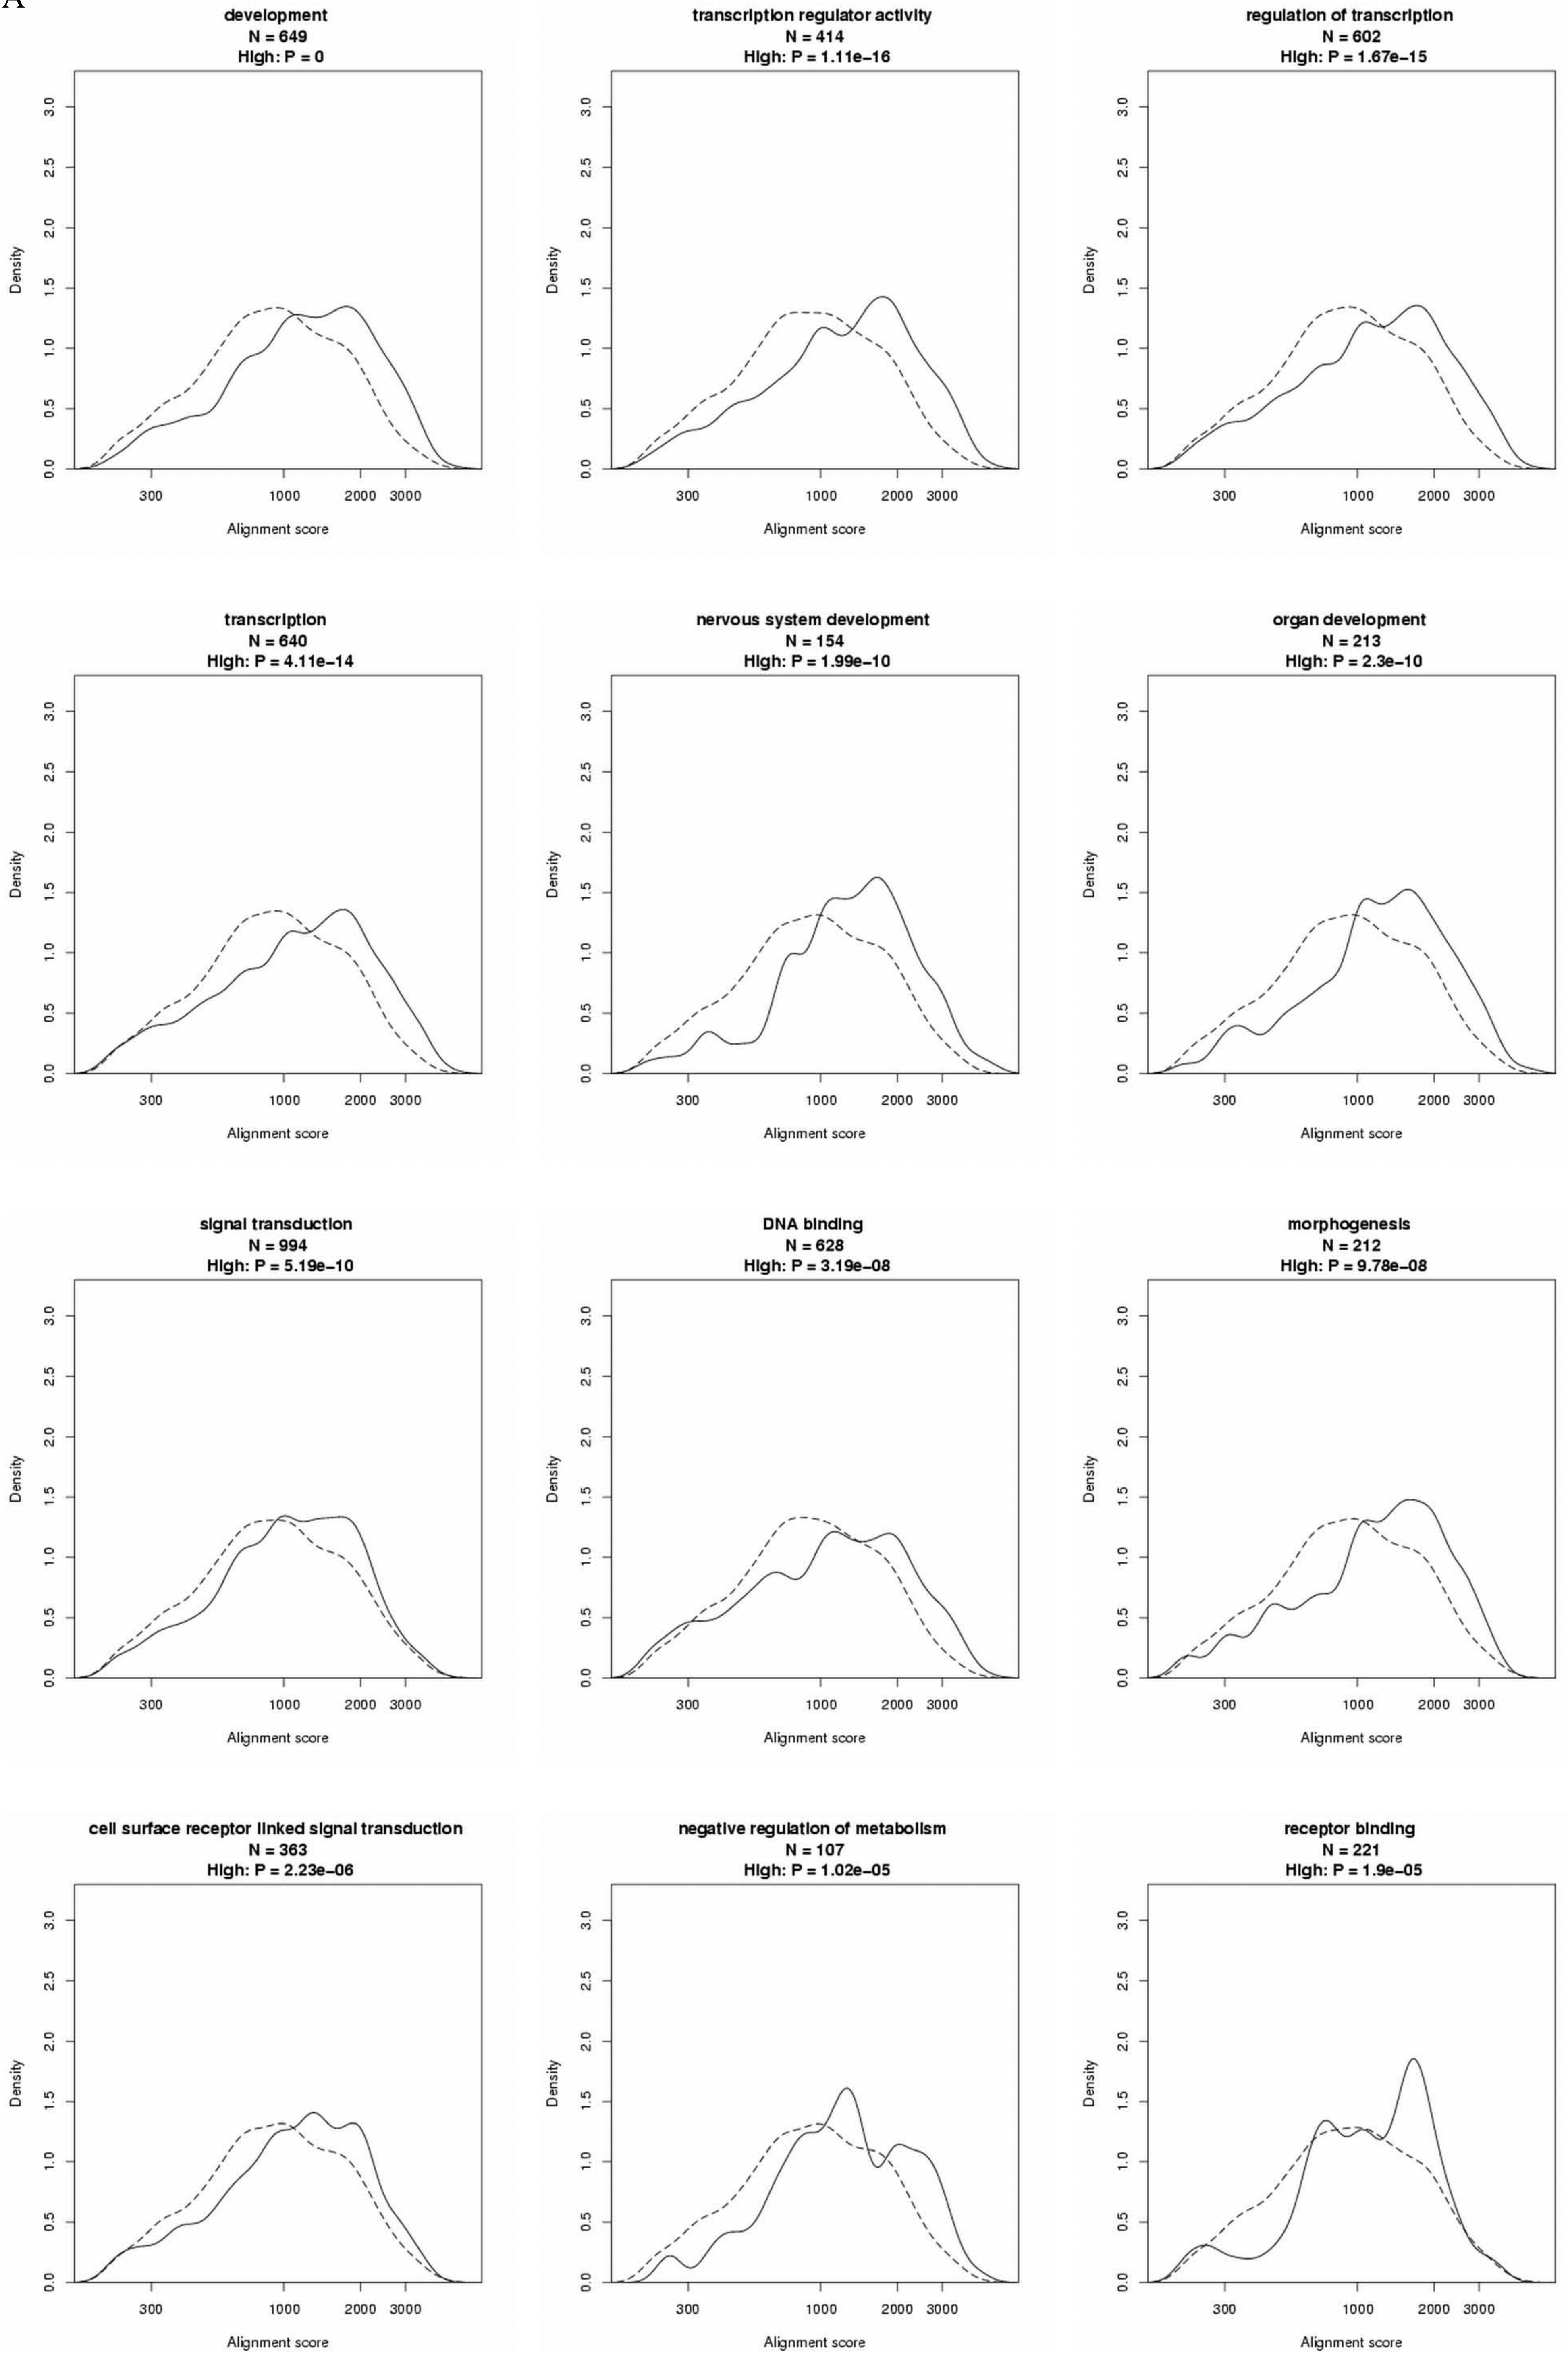

**cell-cell signaling**  
N = 176  
High: P = 2.27e-05

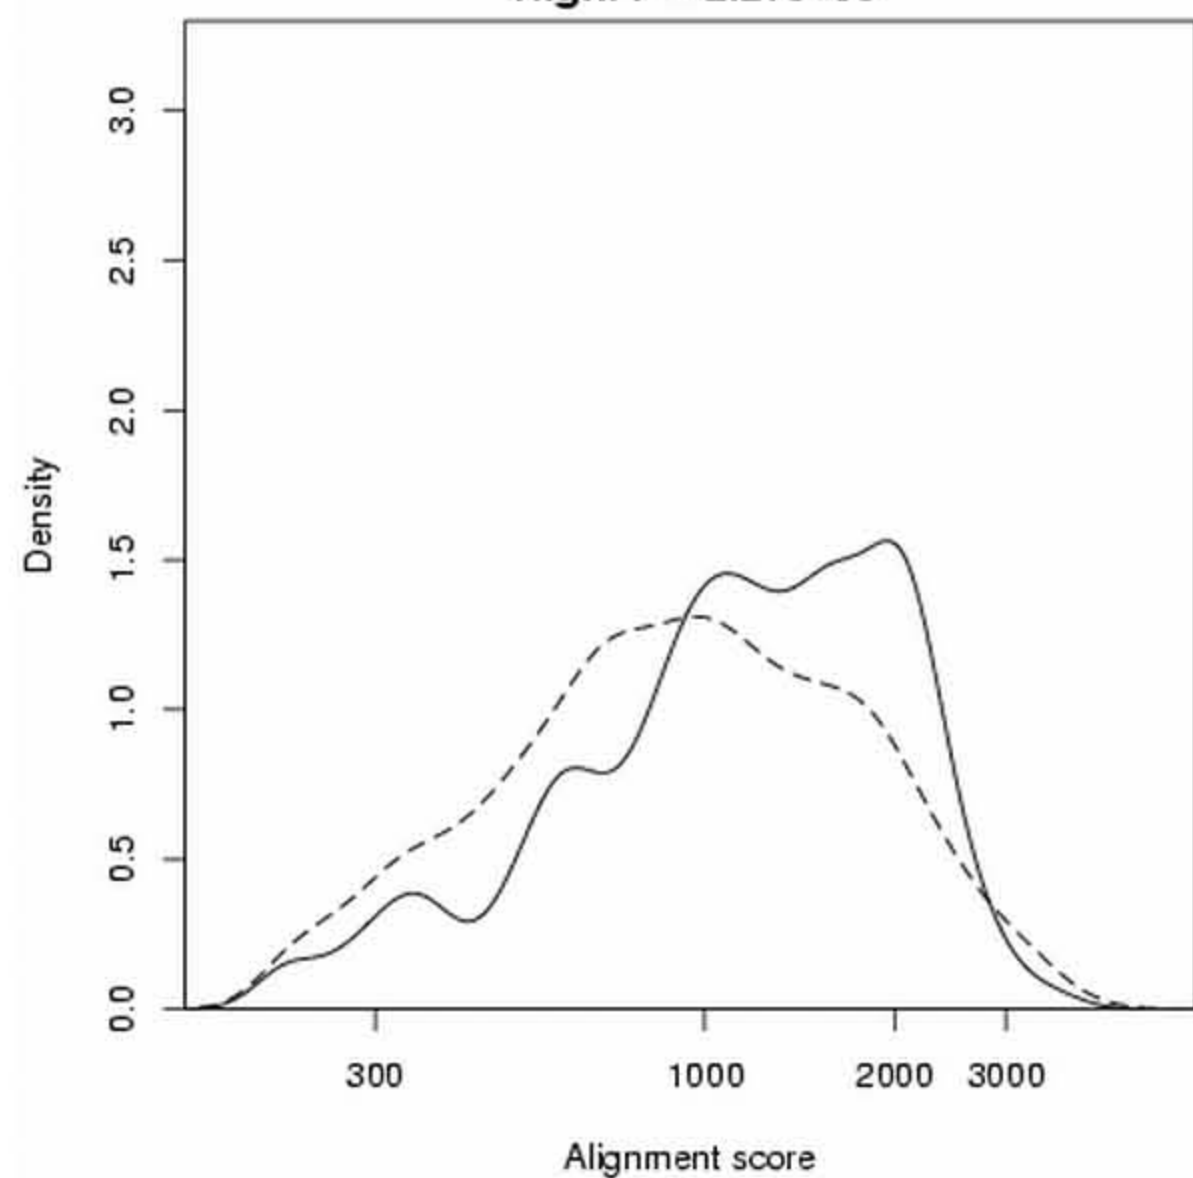

**cytoskeletal protein binding**  
N = 137  
High: P = 4.97e-05

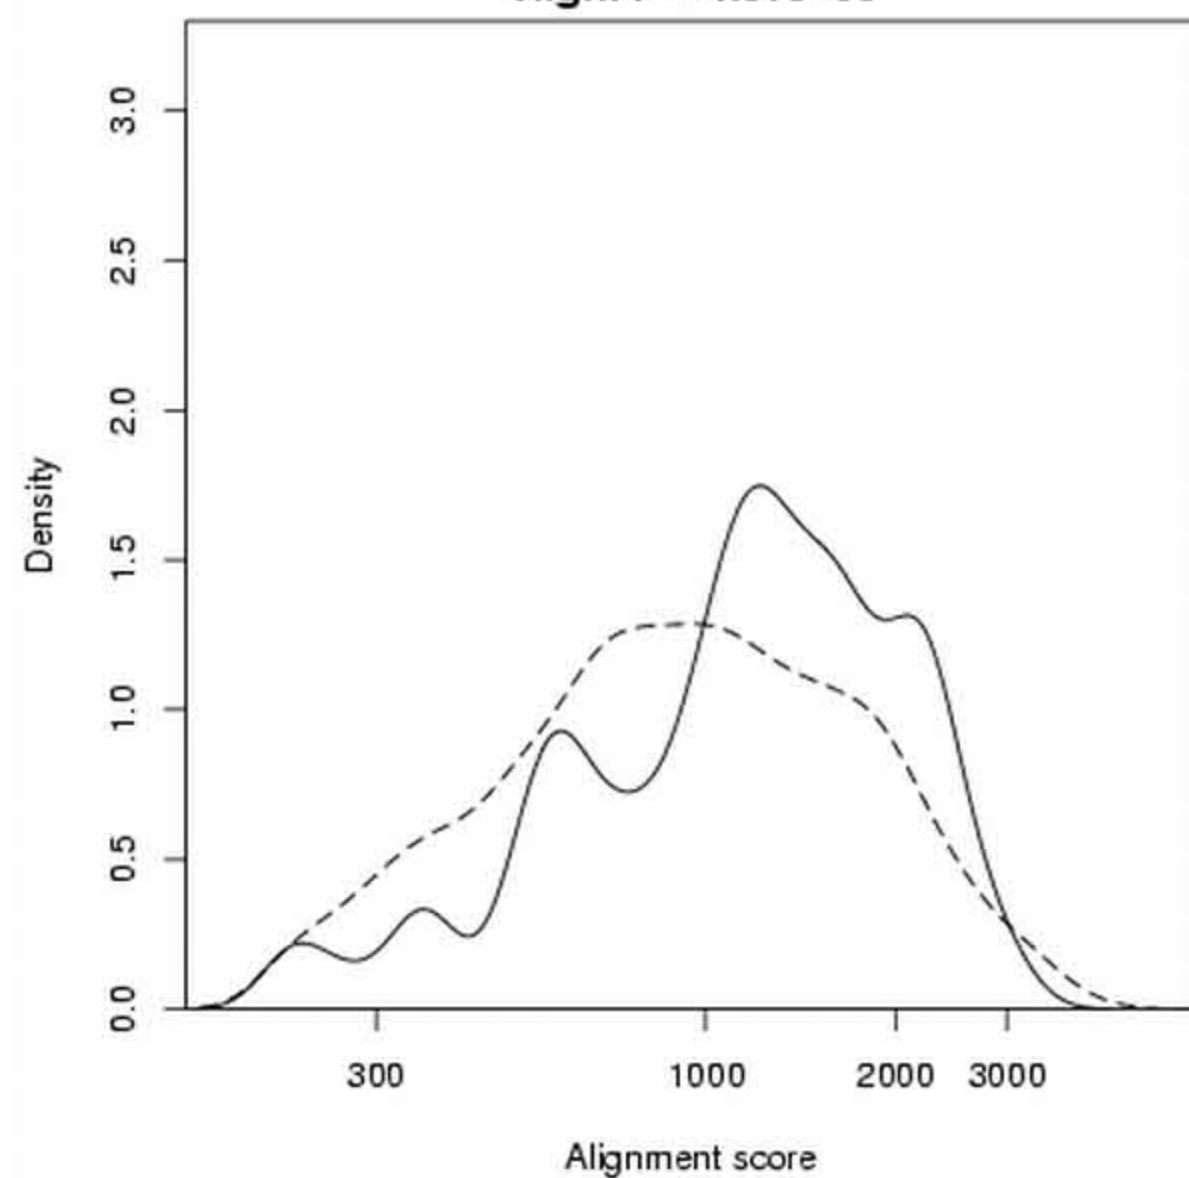

**negative regulation of biological process**  
N = 327  
High: P = 6.87e-05

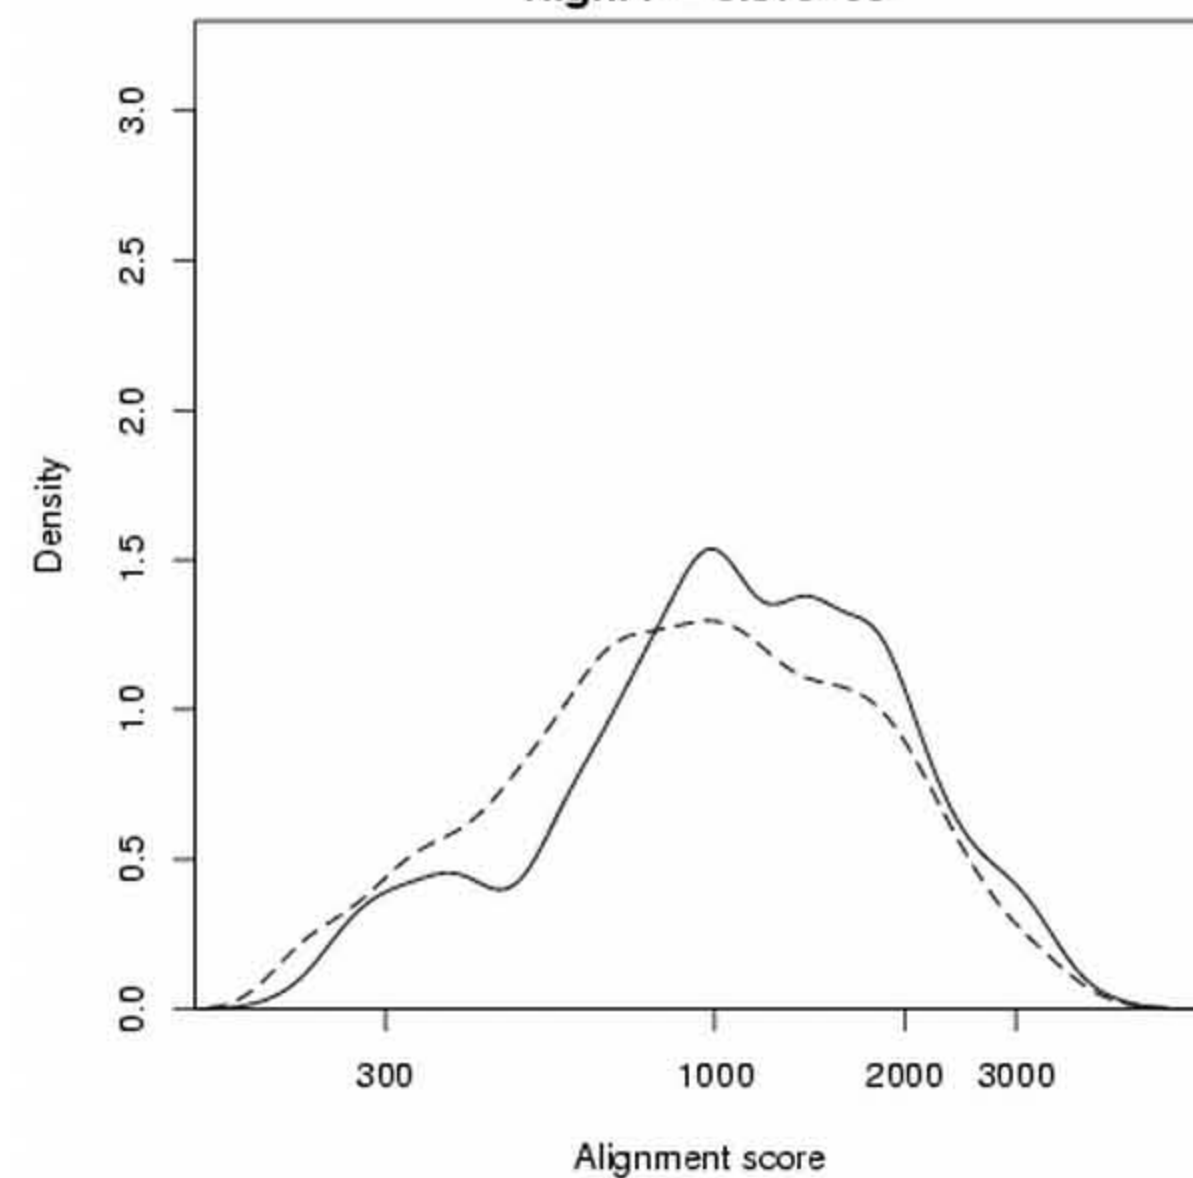

**ion channel activity**  
N = 98  
High: P = 9.87e-05

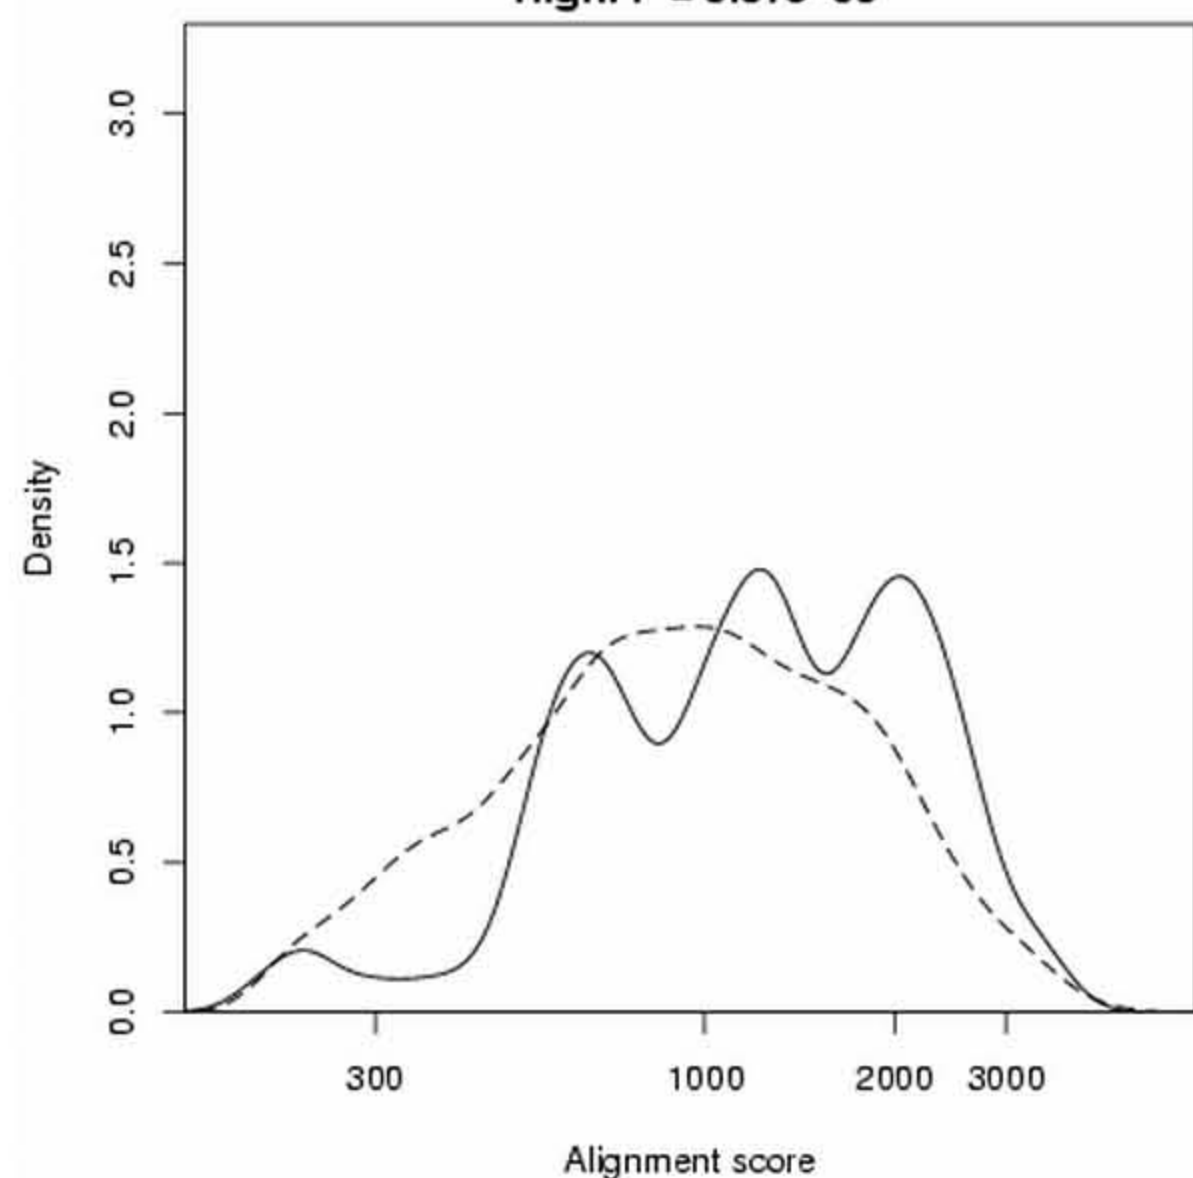

**extracellular matrix**  
N = 111  
High: P = 0.000119

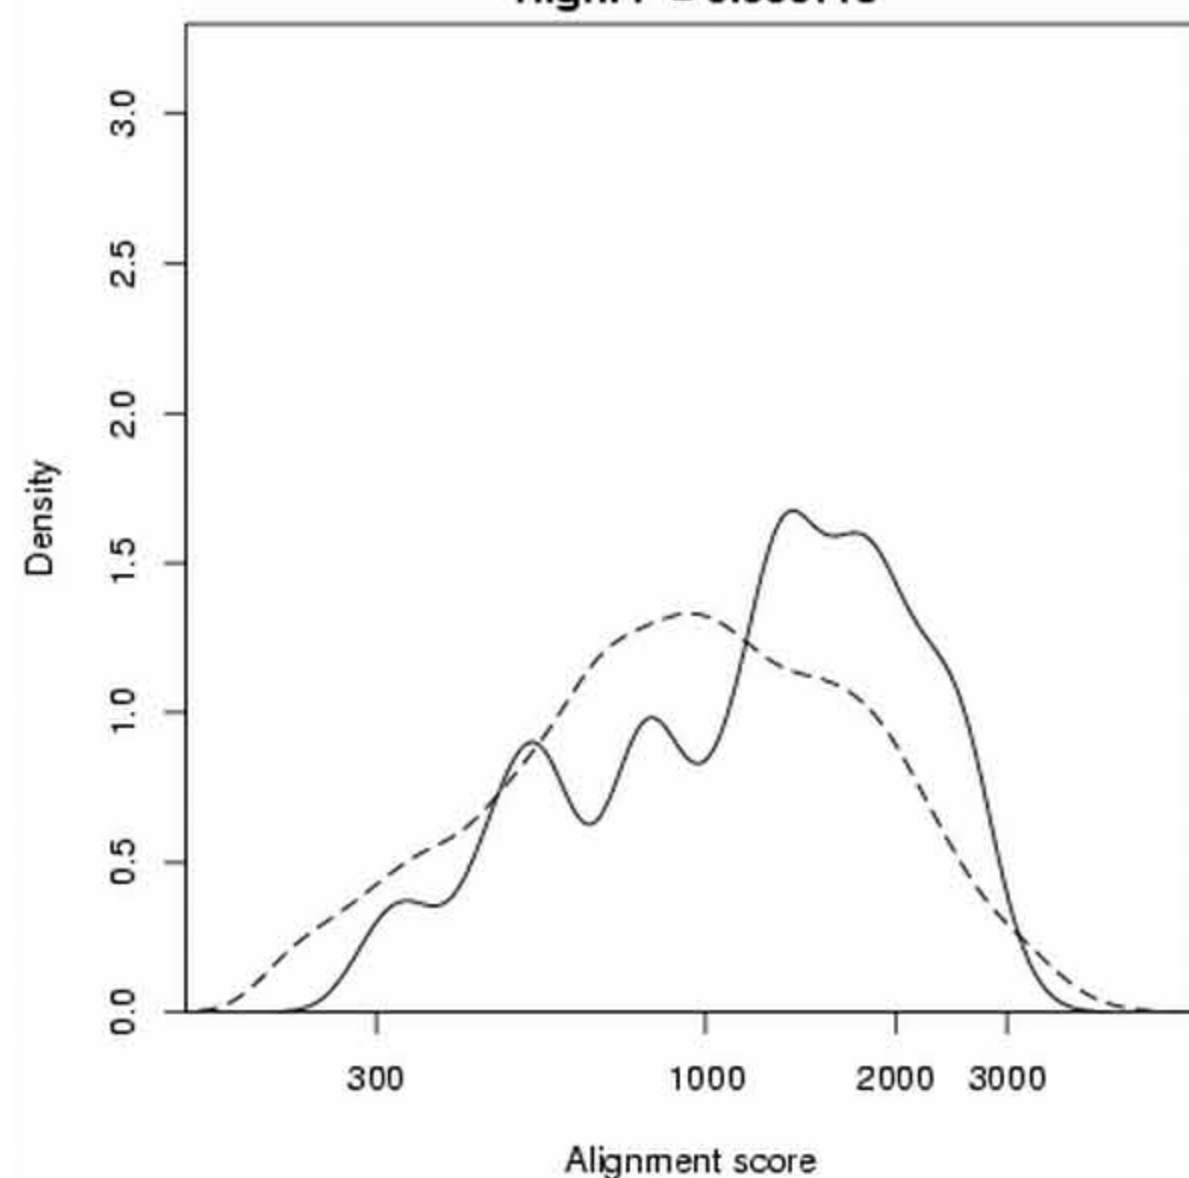

**actin cytoskeleton**  
N = 85  
High: P = 0.000164

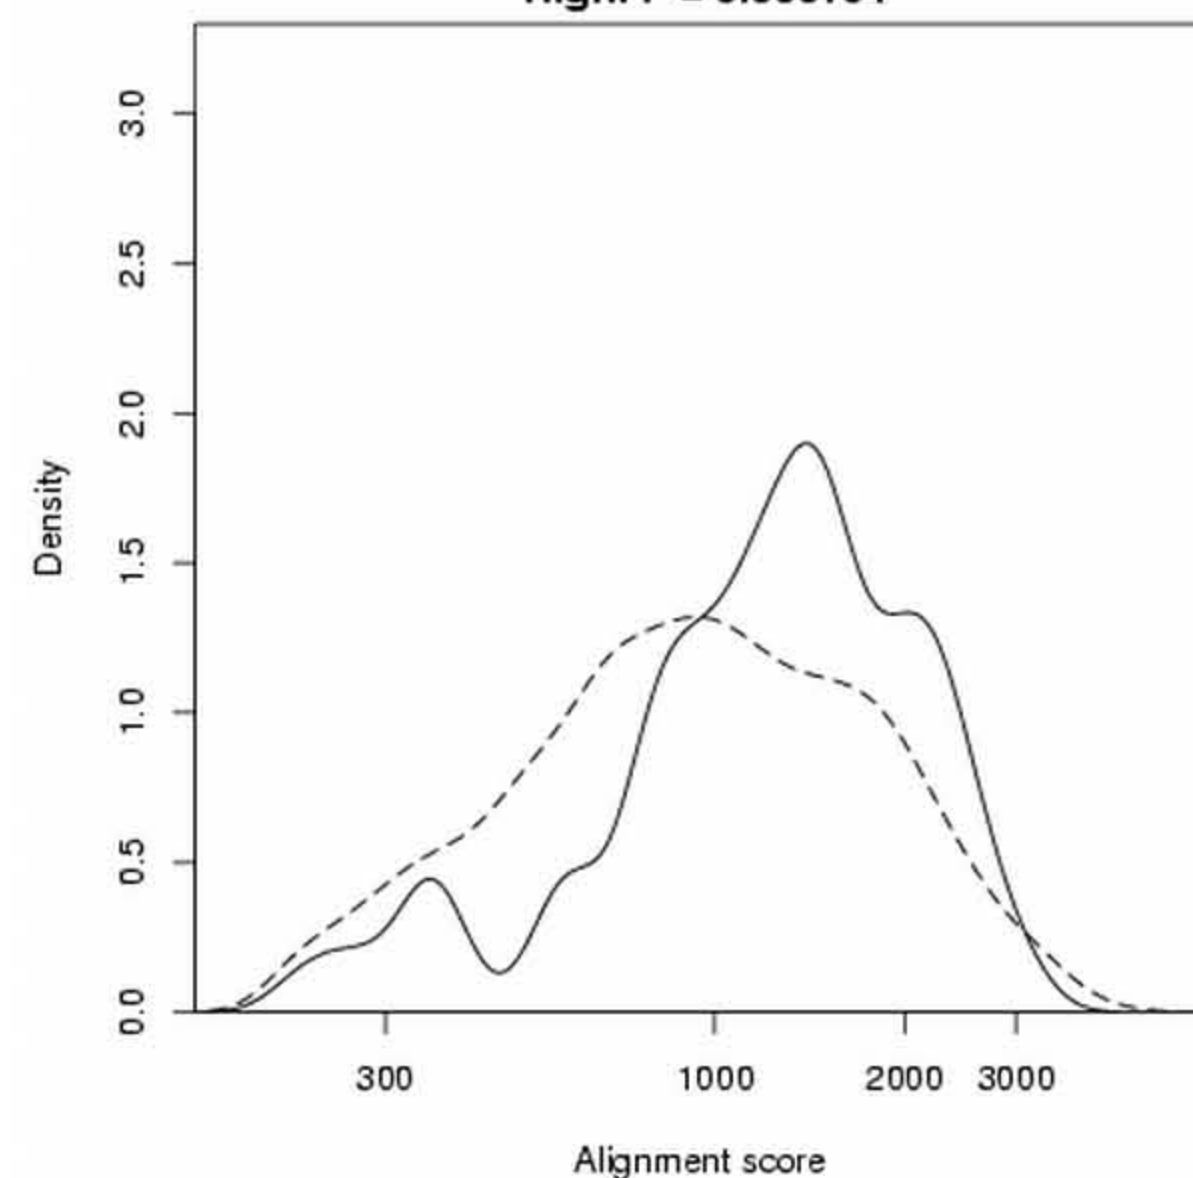

**cell differentiation**  
N = 173  
High: P = 0.000179

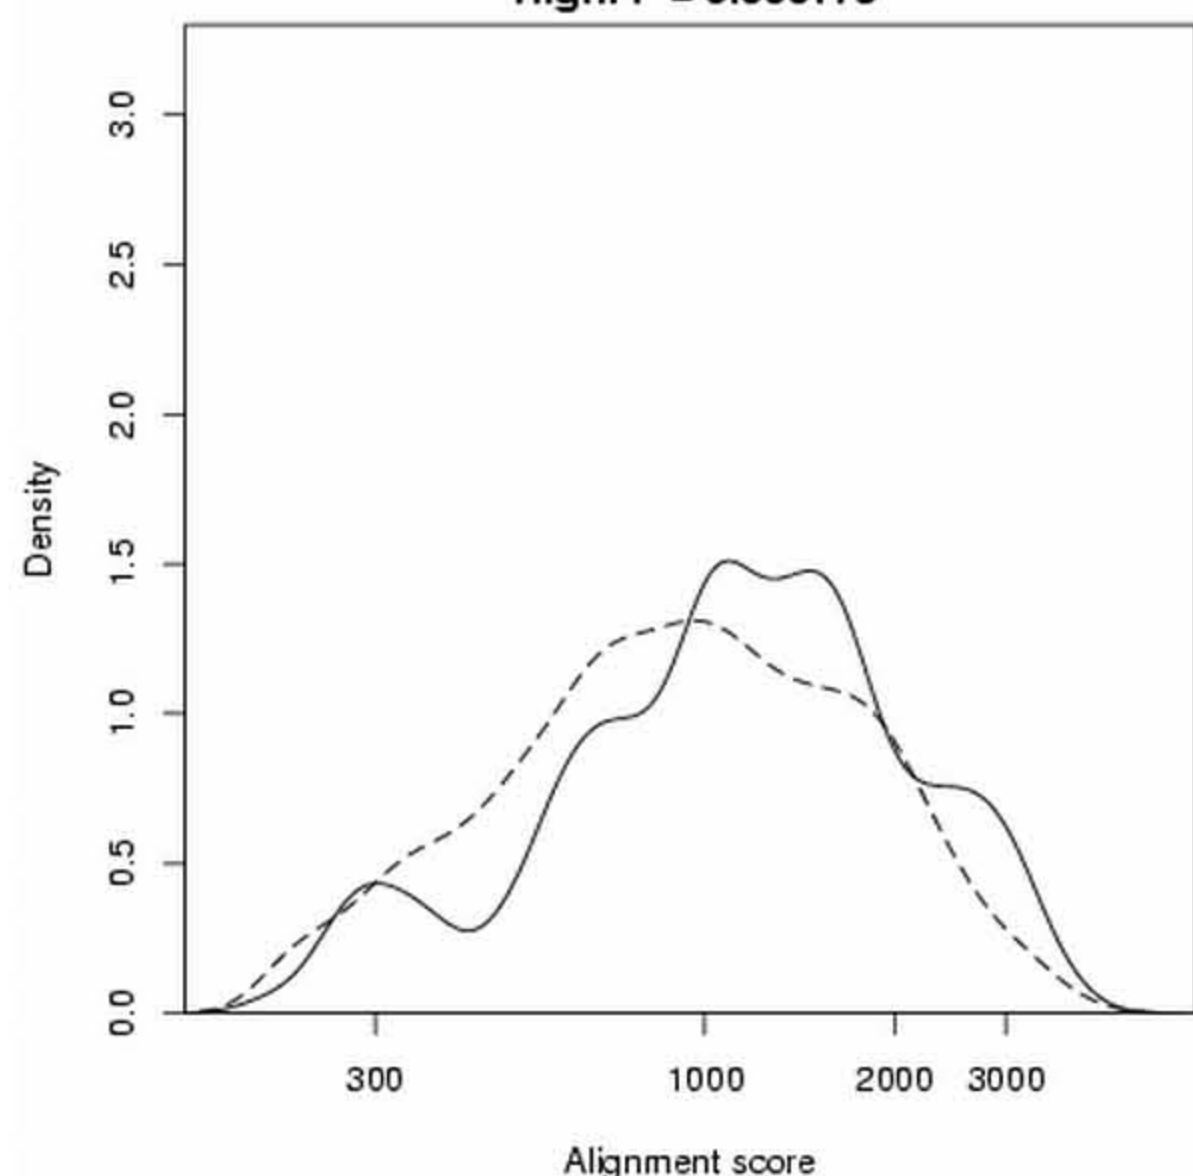

**cell adhesion**  
N = 242  
High: P = 0.000182

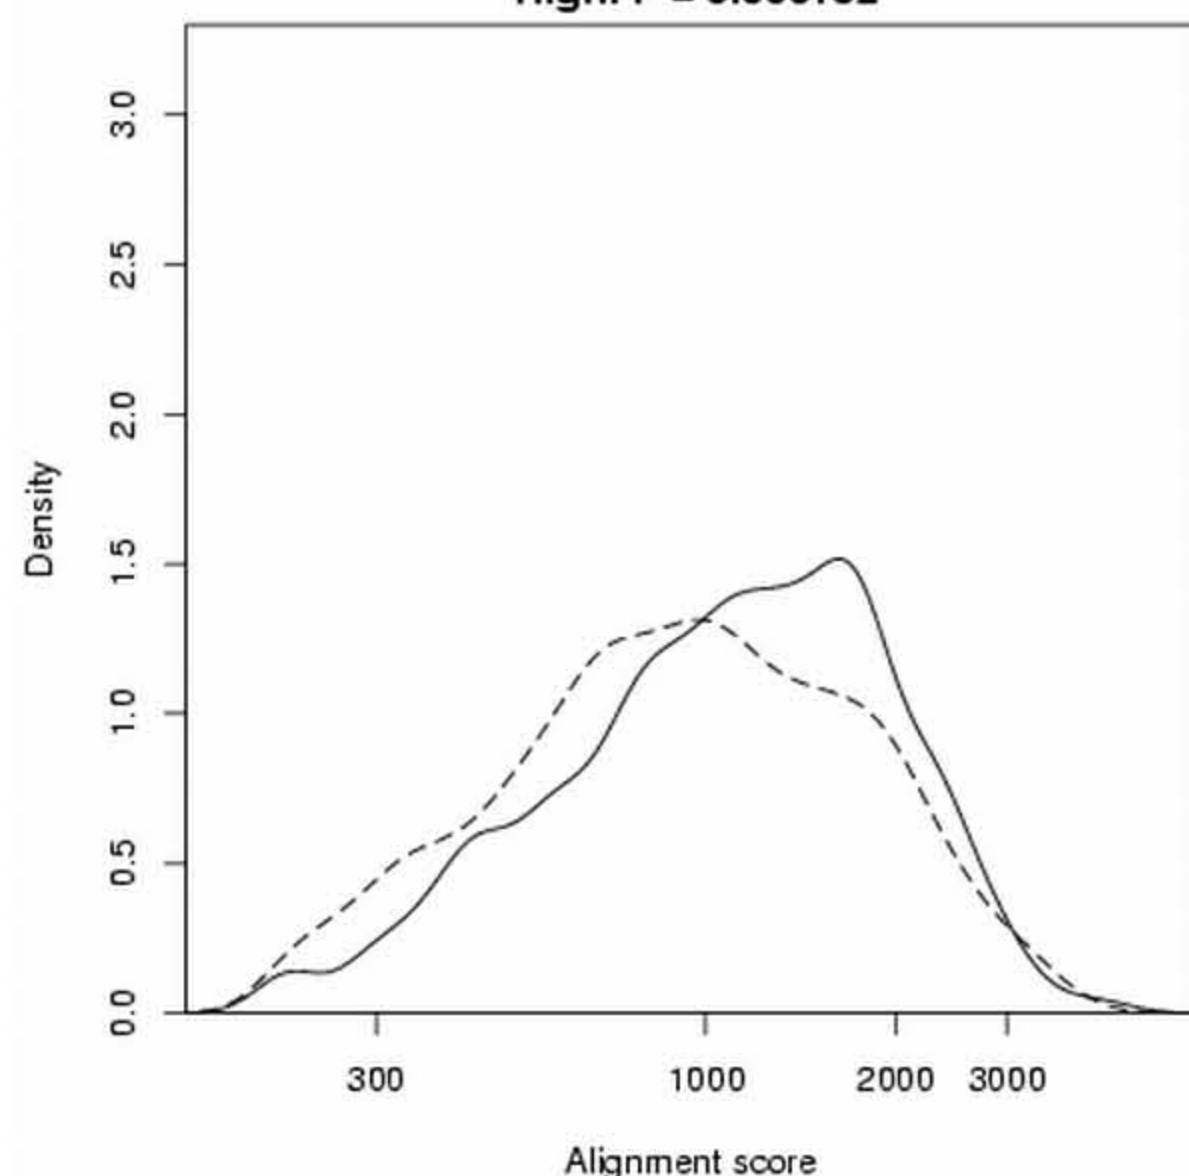

**cellular morphogenesis**  
N = 111  
High: P = 0.000607

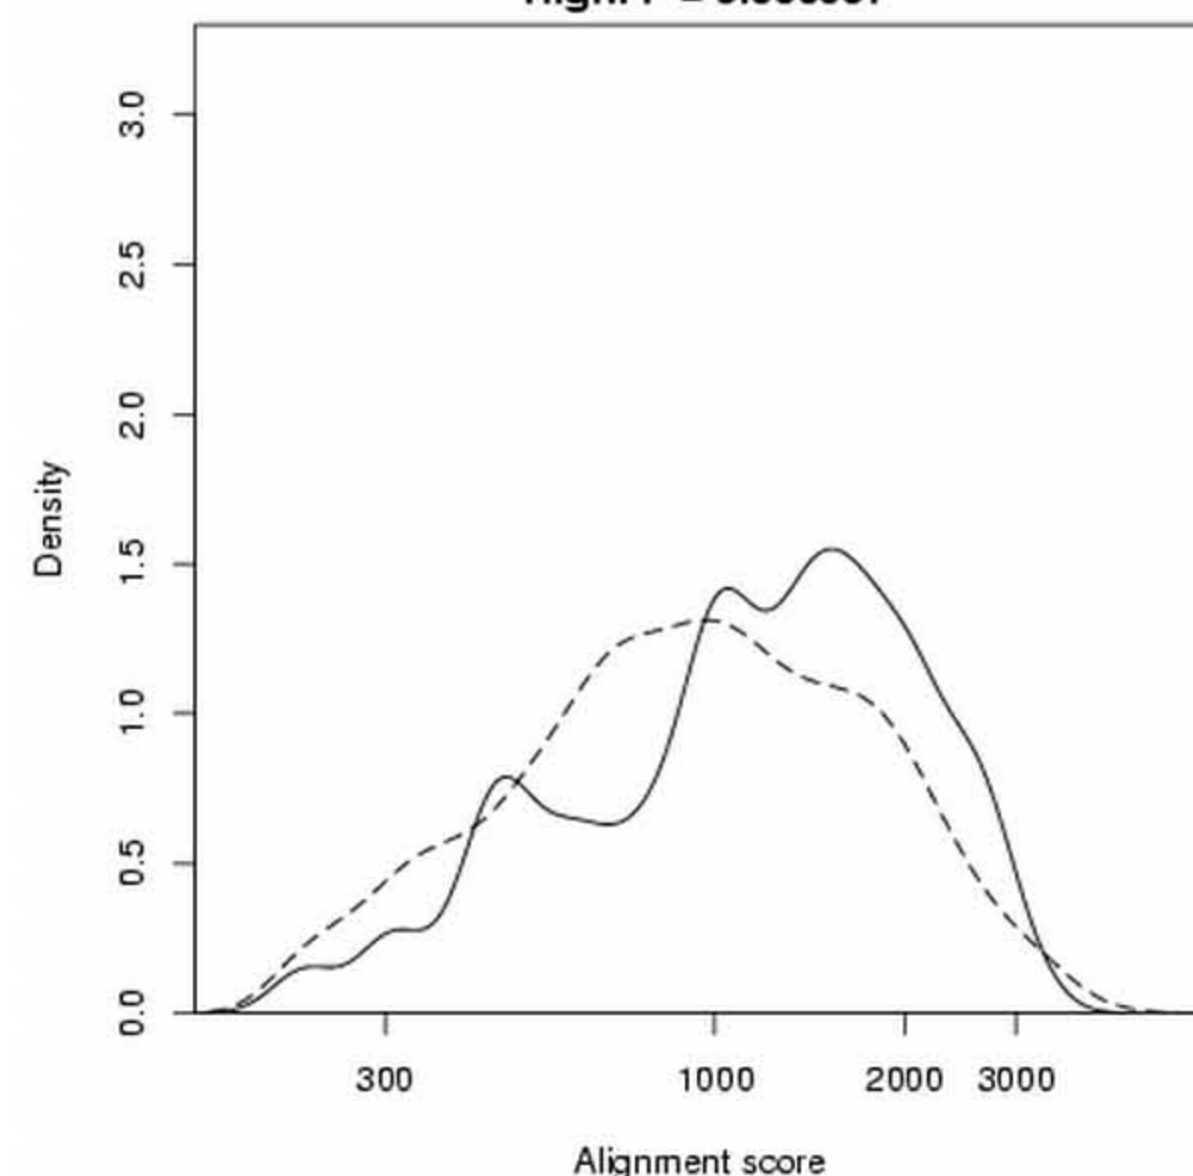

**ion transporter activity**  
N = 237  
High: P = 0.00149

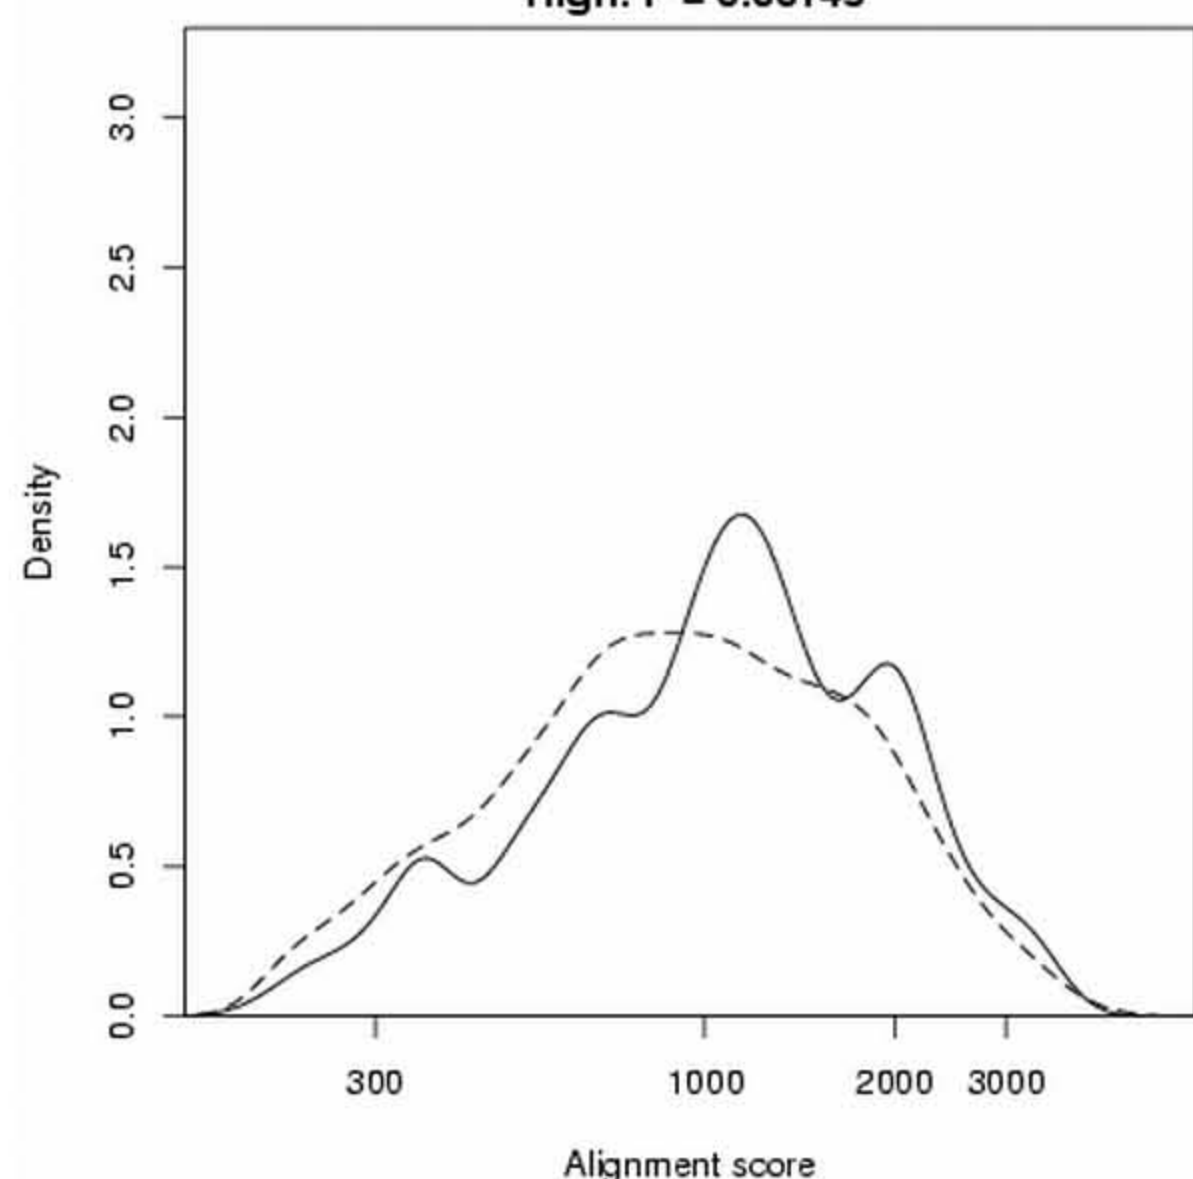

**protein amino acid phosphorylation**  
N = 213  
High: P = 0.00159

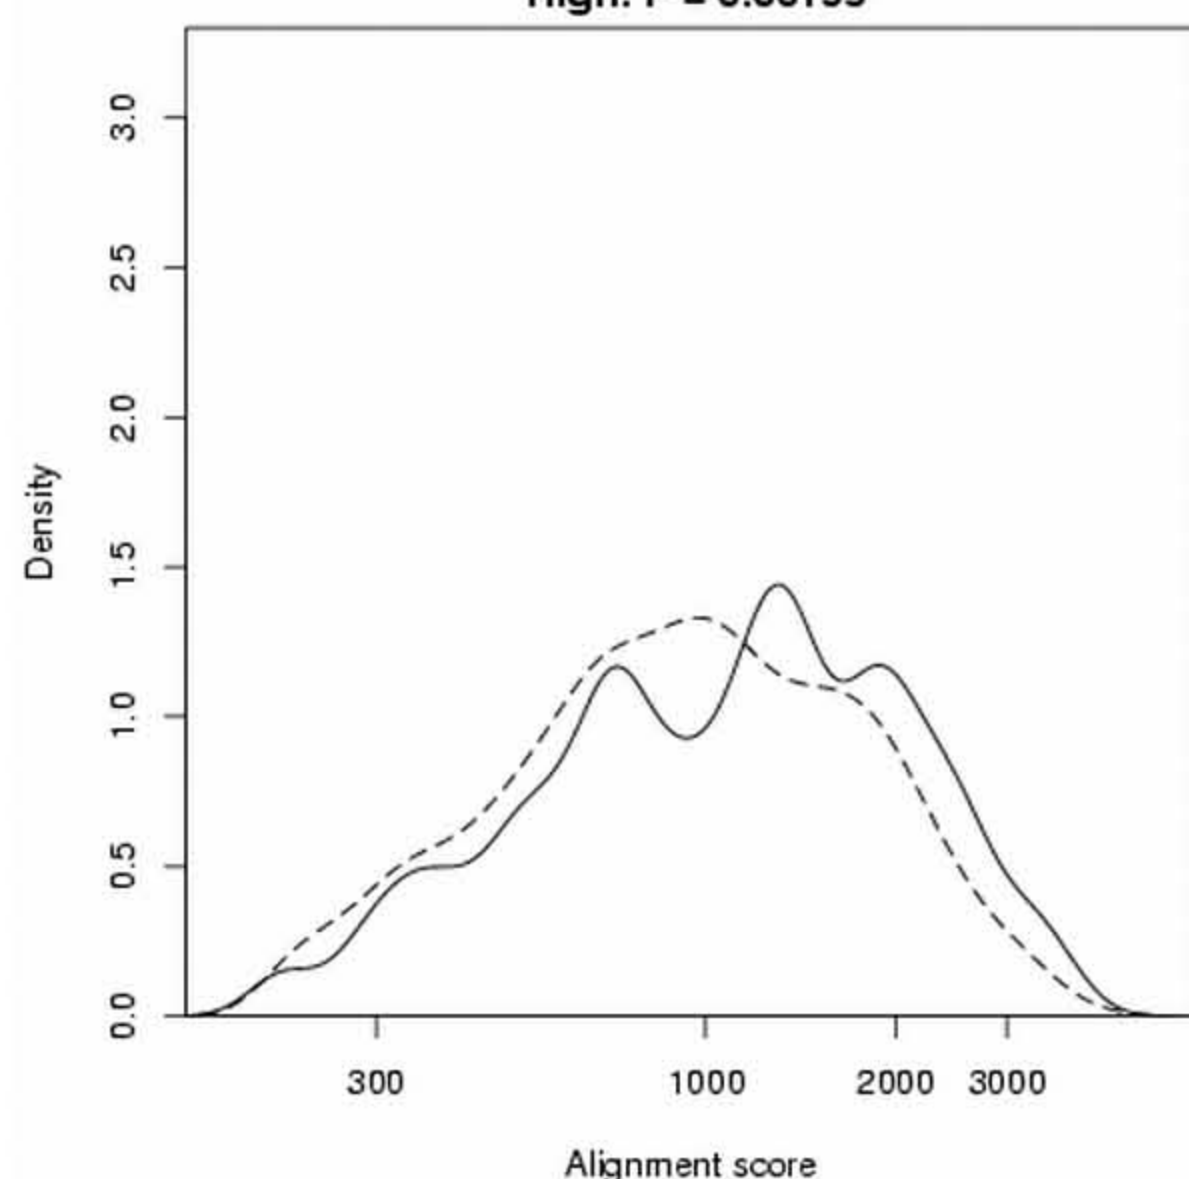

**ion transport**  
N = 239  
High: P = 0.00182

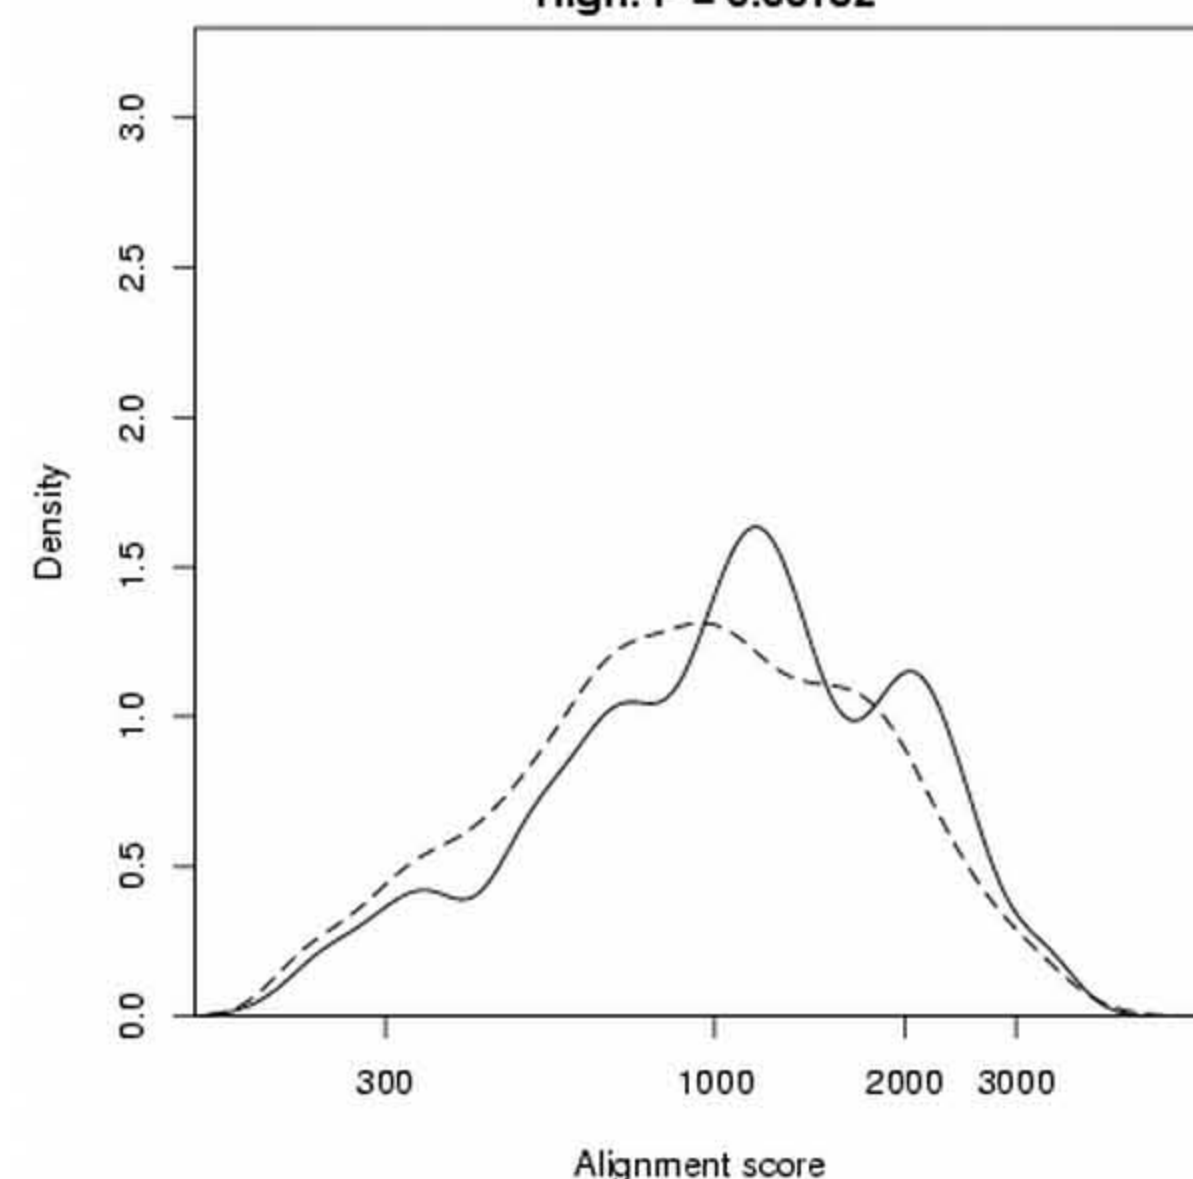

**protein kinase activity**  
N = 220  
High: P = 0.00203

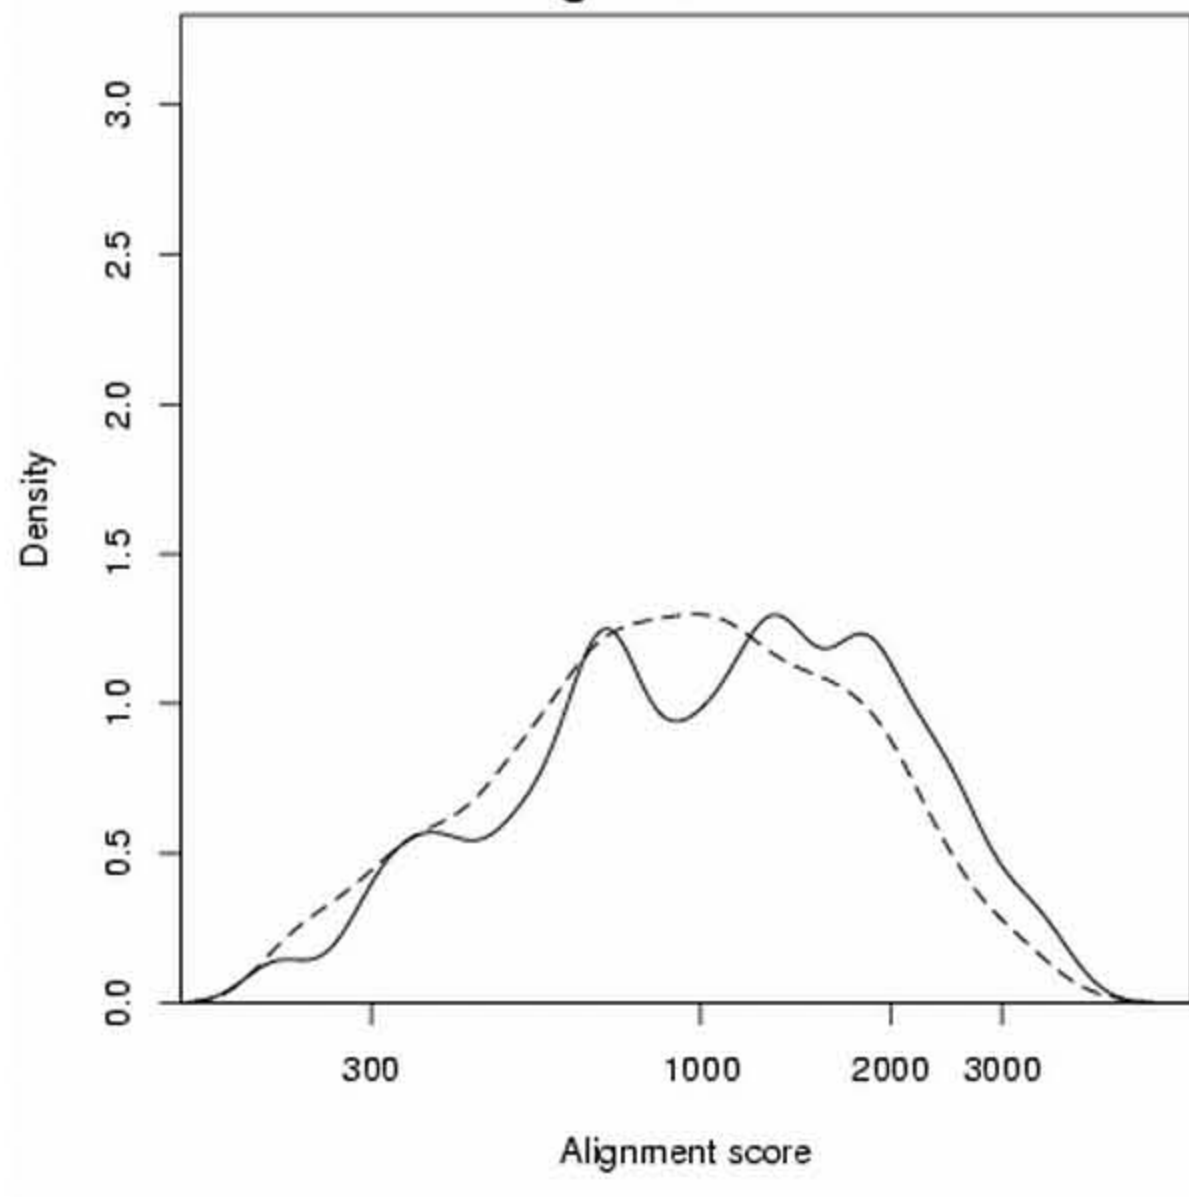

**Intracellular signalling cascade**  
N = 431  
High: P = 0.00687

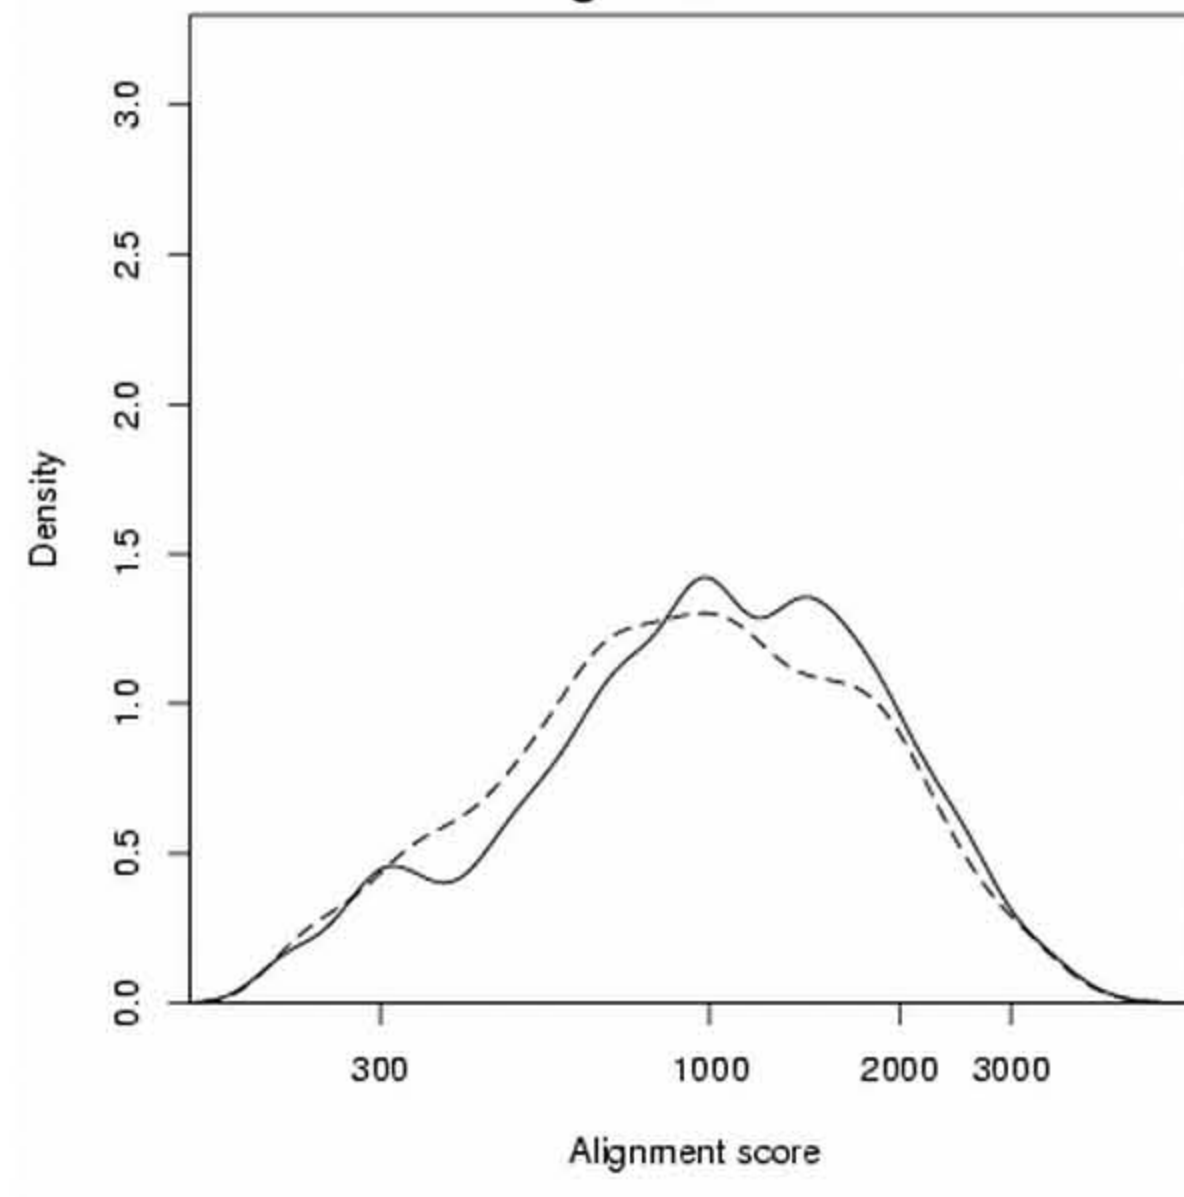

**chromosome organization and biogenesis**  
N = 105  
High: P = 0.00783

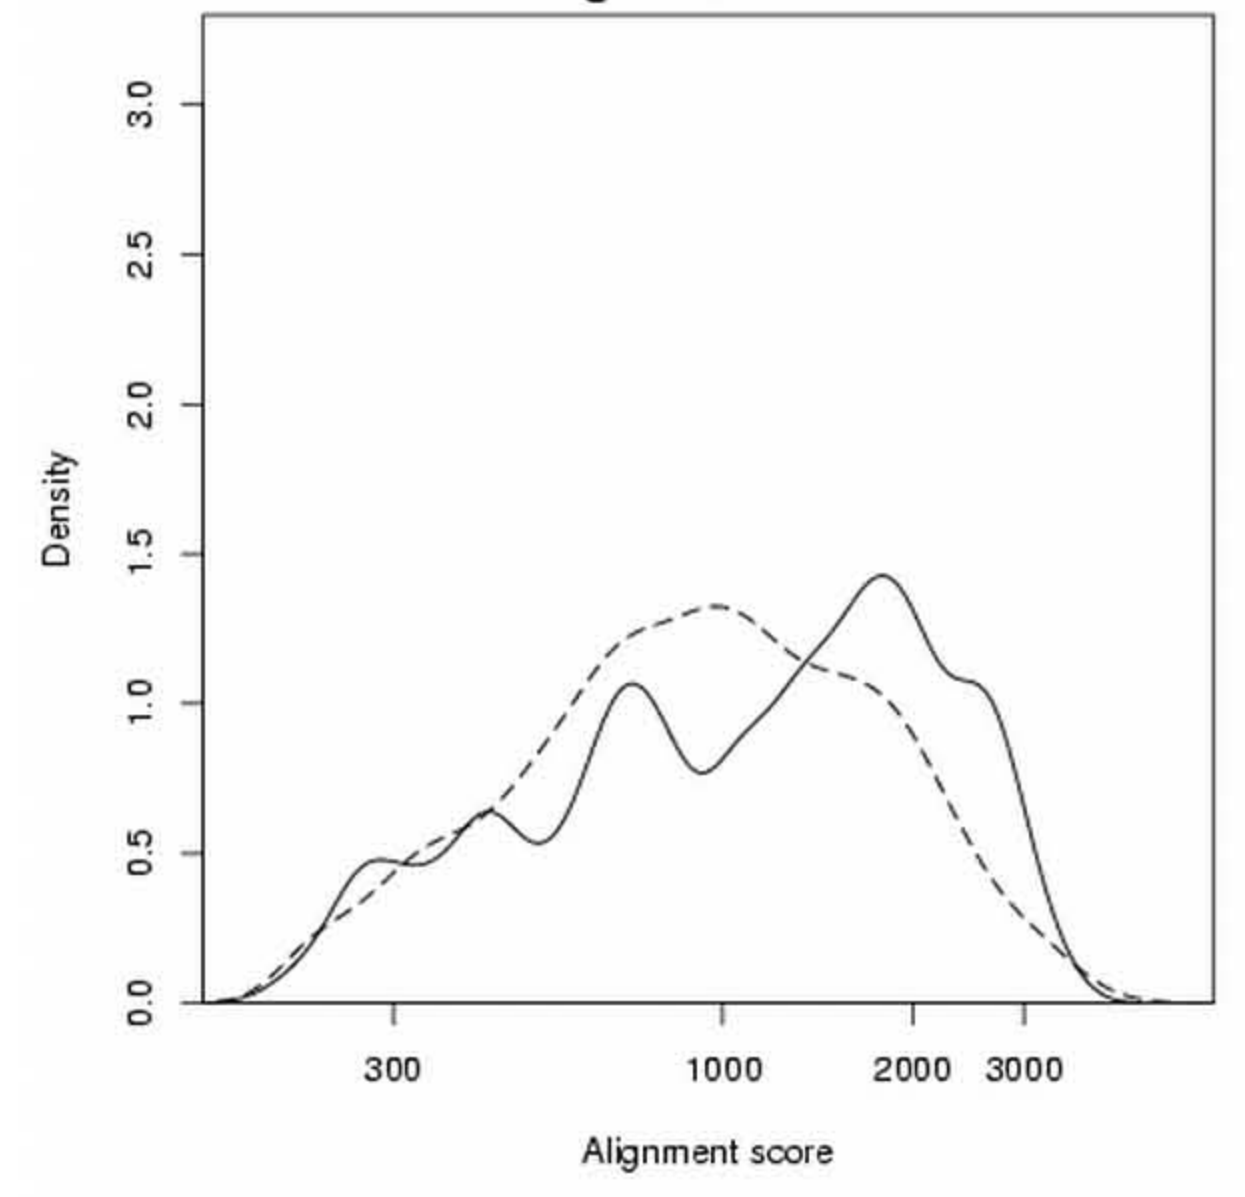

**plasma membrane**  
N = 608  
High: P = 0.00803

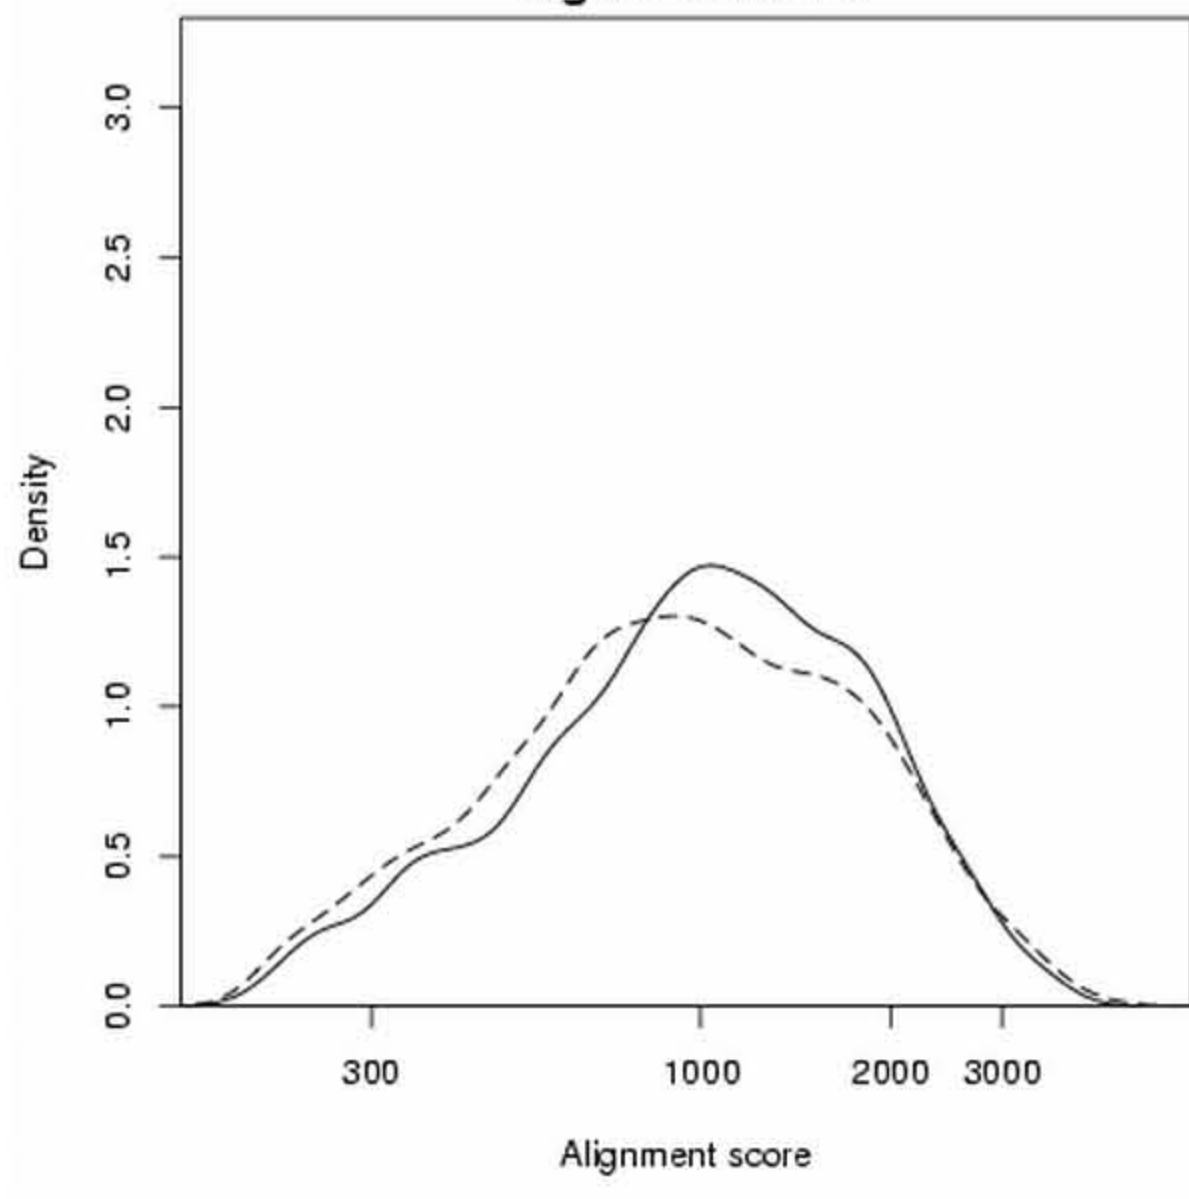

**B**

**mitochondrion**  
N = 398  
Low: P = 5.31e-09

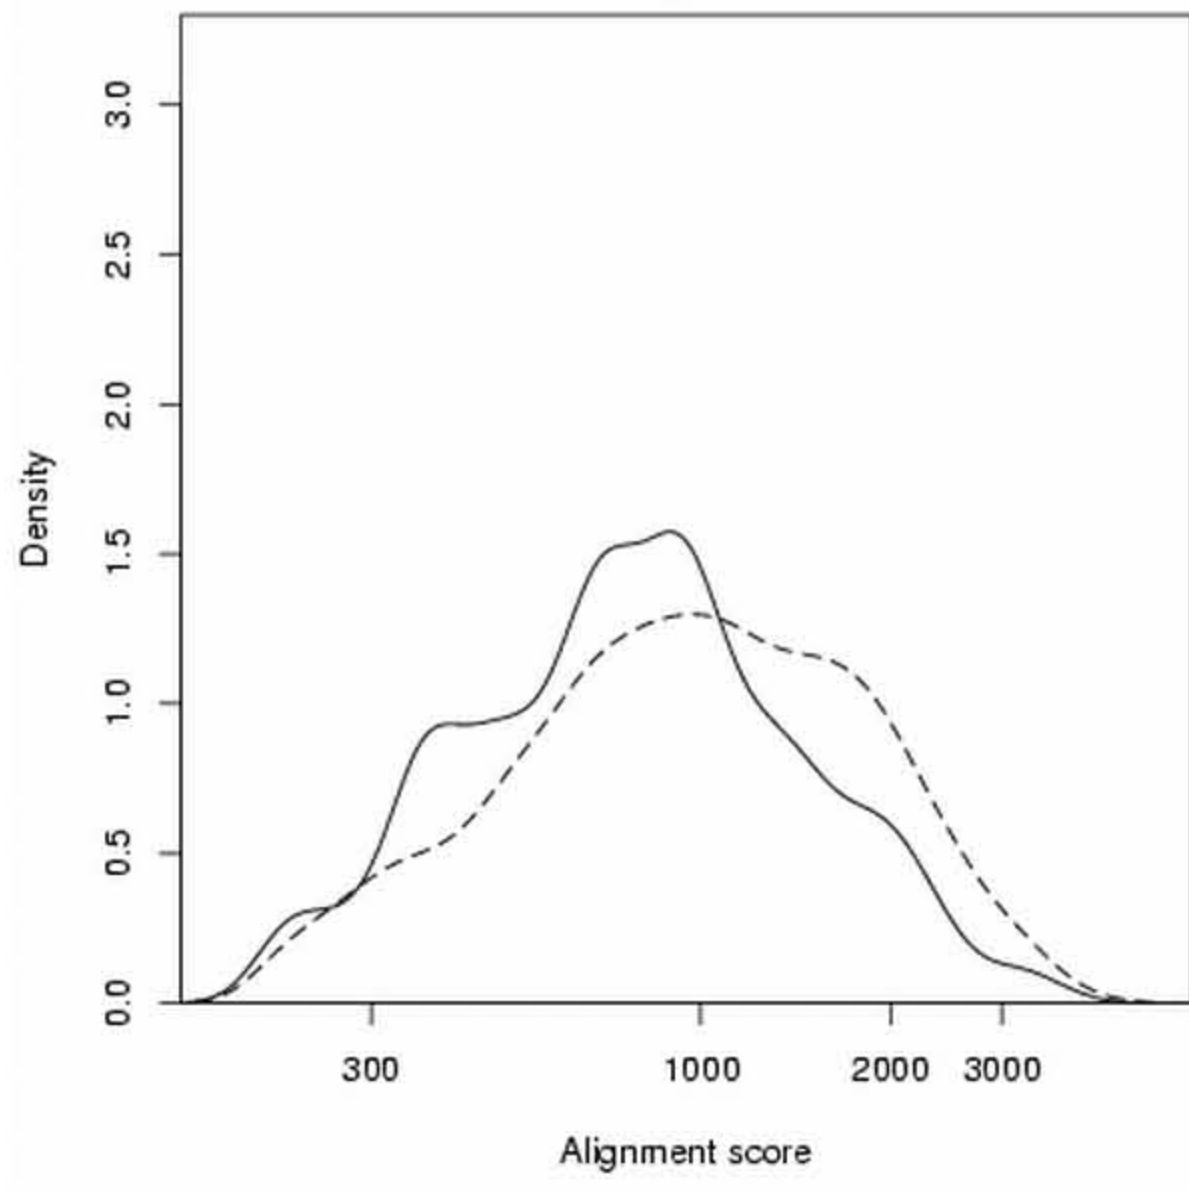

**oxidoreductase activity**  
N = 309  
Low: P = 2.07e-08

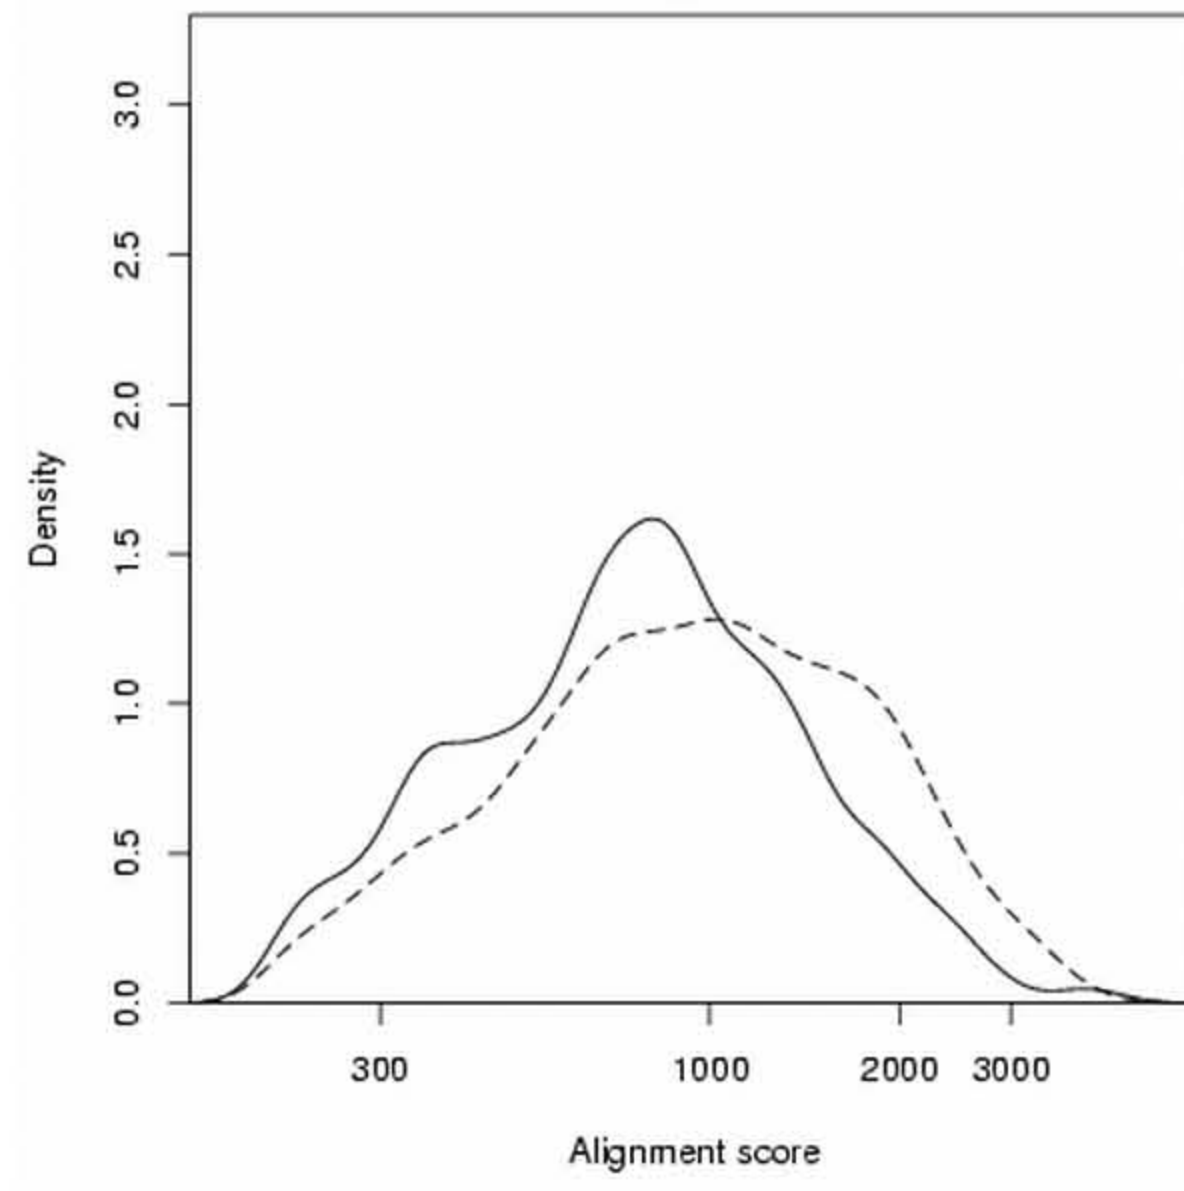

**lysosome**  
N = 77  
Low: P = 9.94e-08

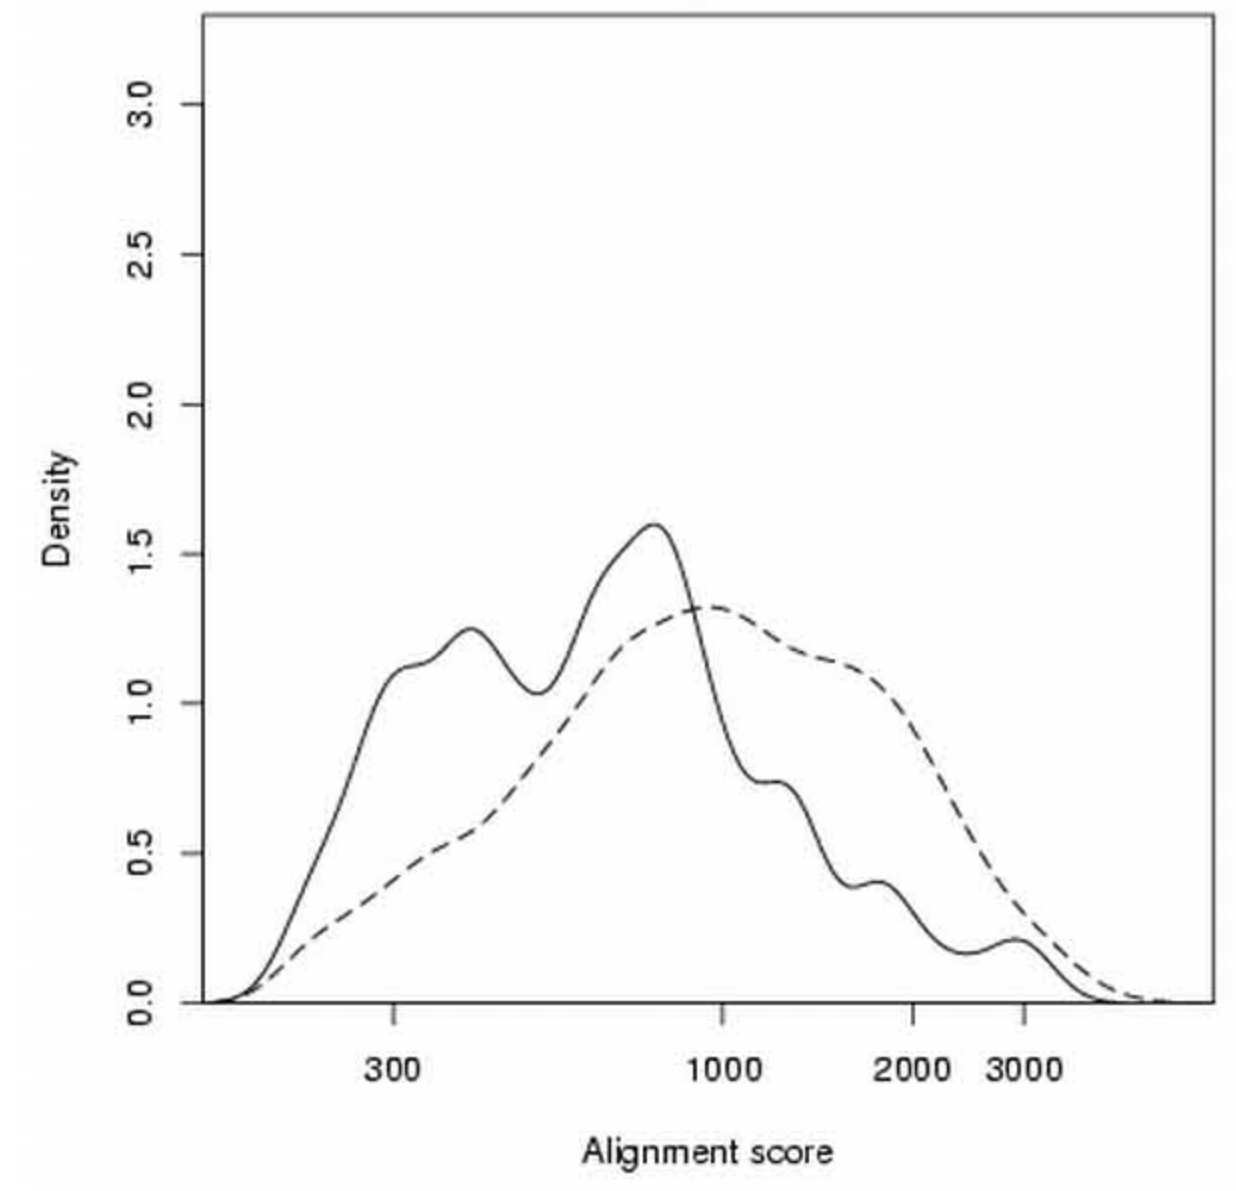

**ribosome**  
N = 114  
Low: P = 7.54e-07

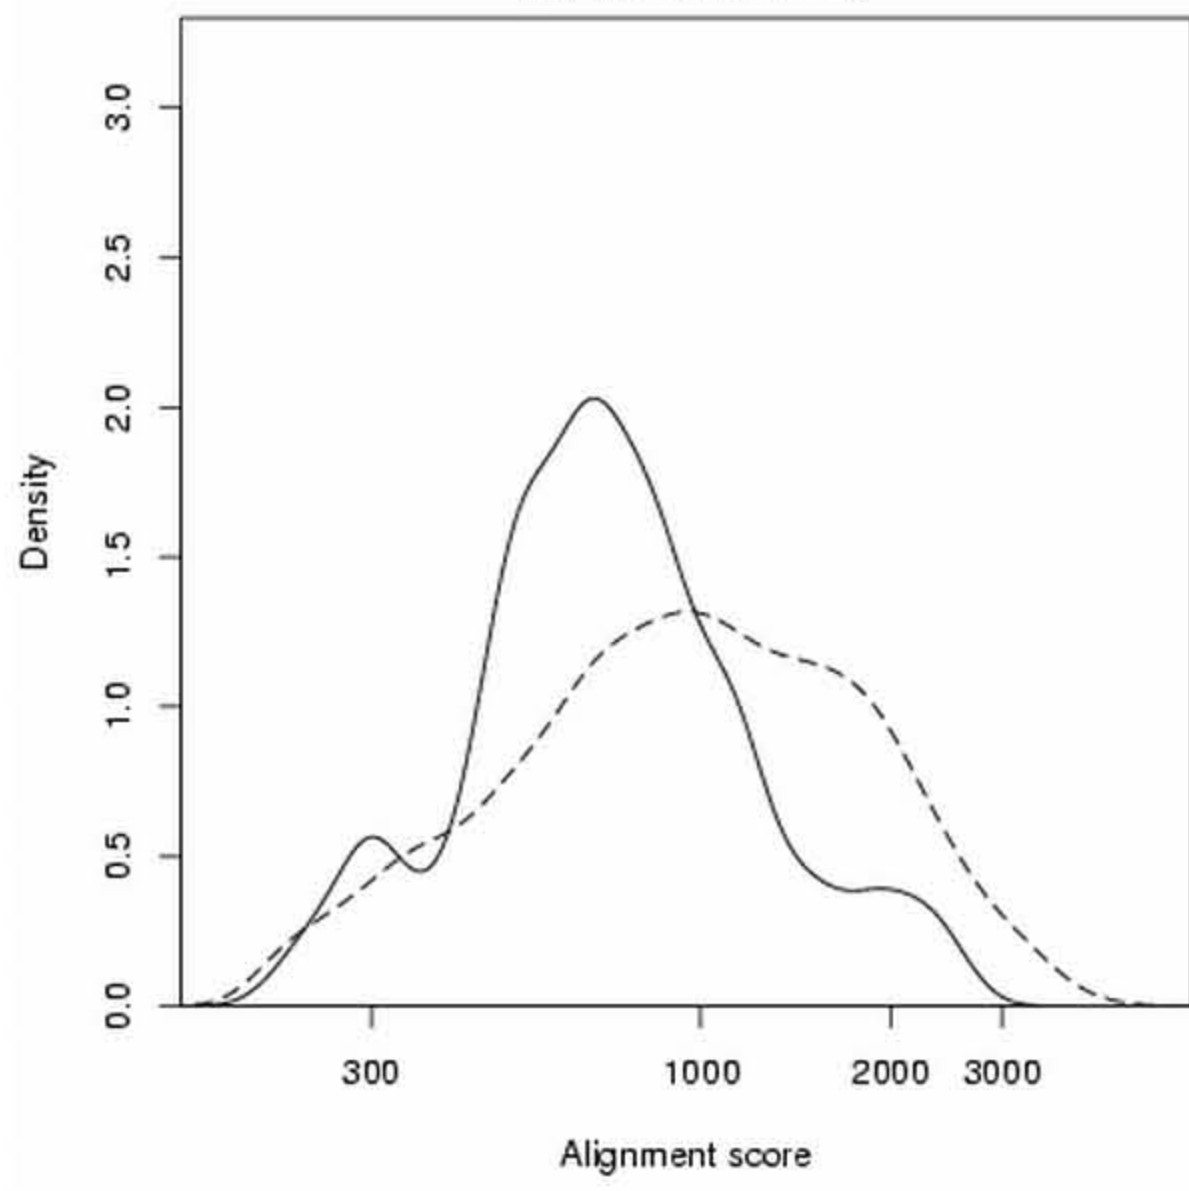

**lipid metabolism**  
N = 260  
Low: P = 1.04e-06

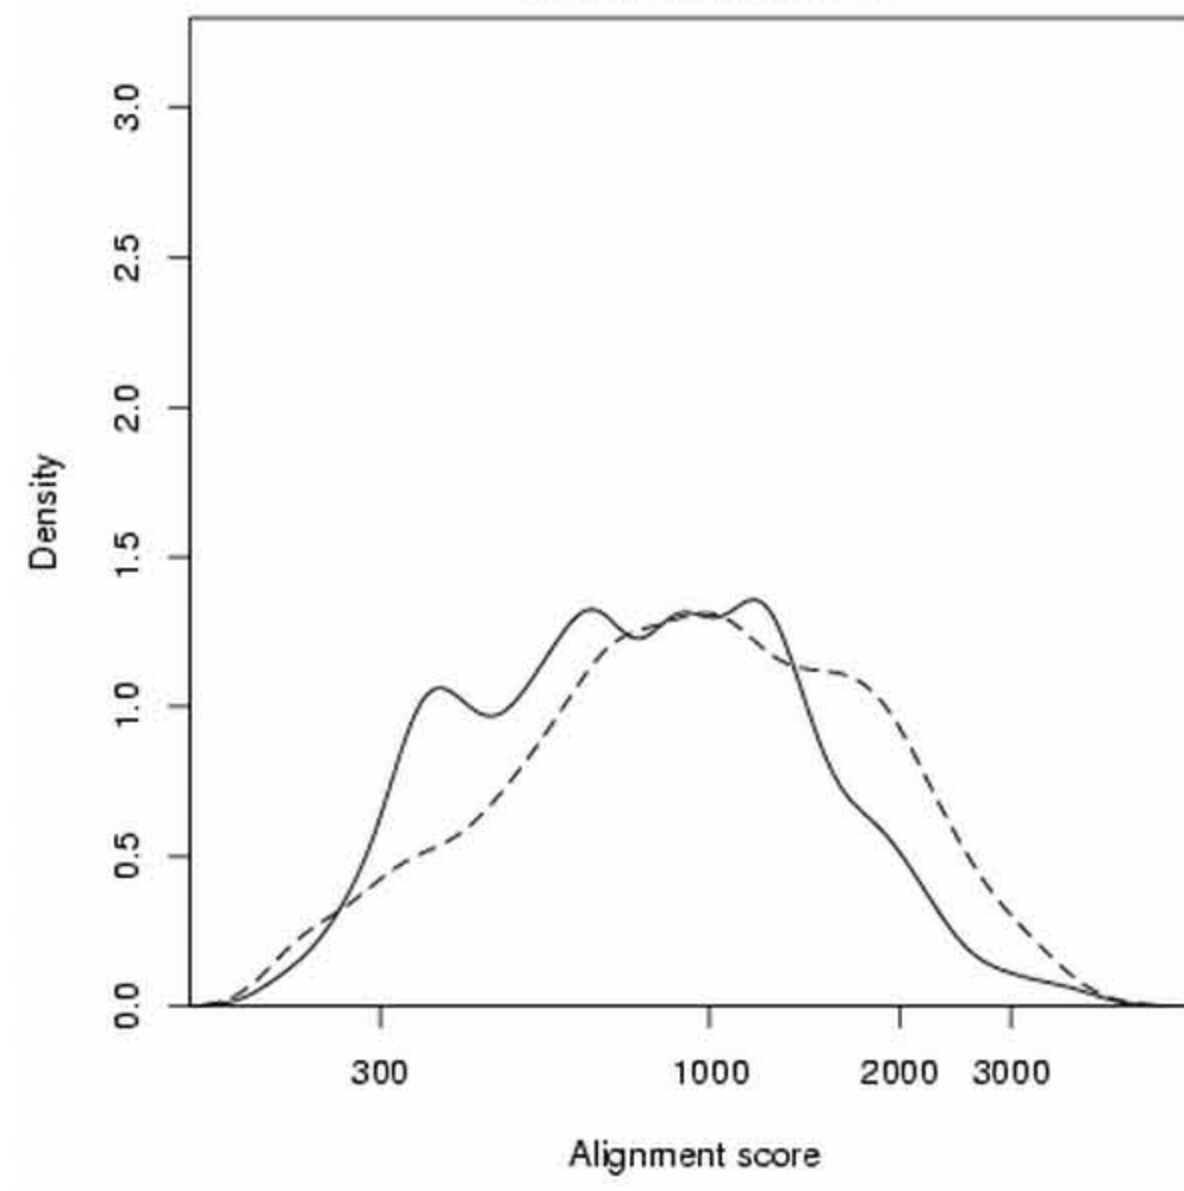

**carboxylic acid metabolism**  
N = 225  
Low: P = 4.43e-06

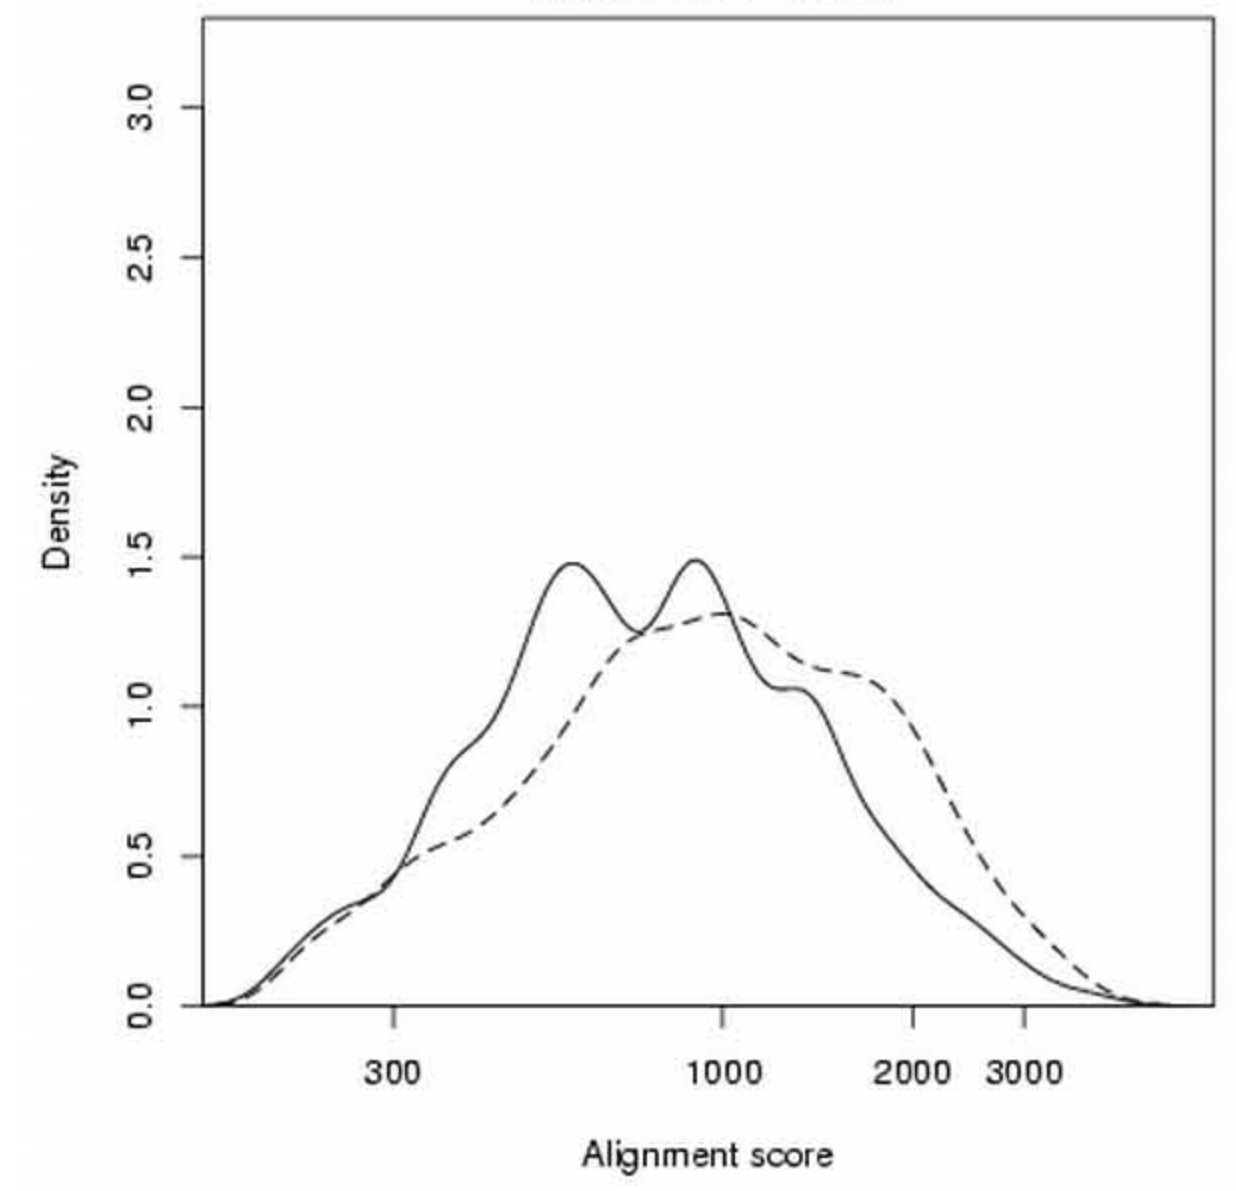

**structural constituent of ribosome**  
N = 130  
Low: P = 5.76e-06

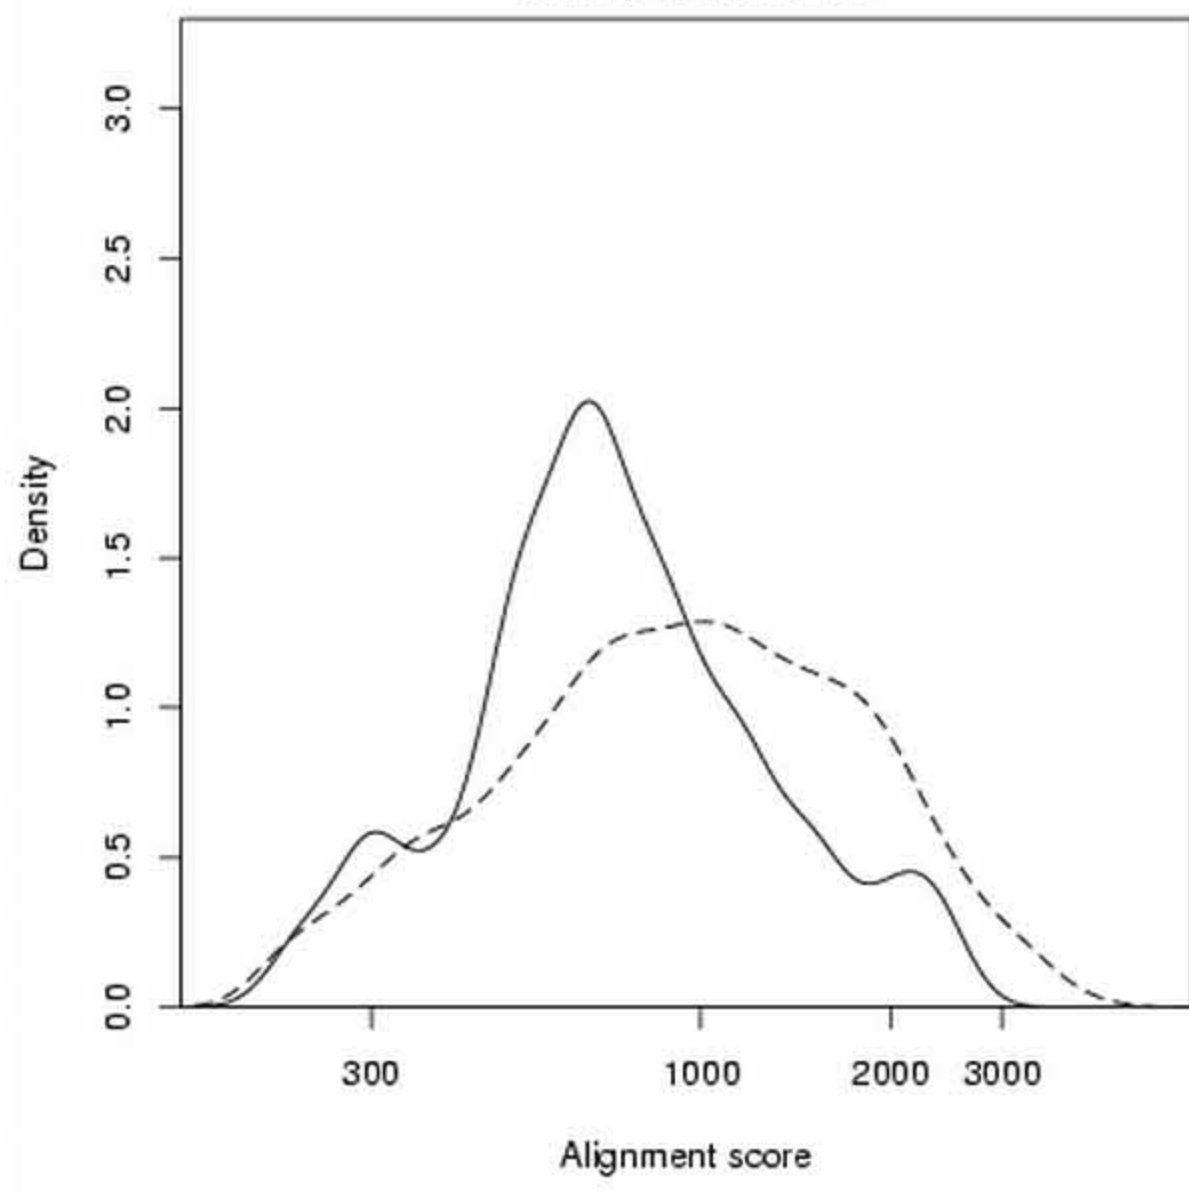

**amino acid metabolism**  
N = 112  
Low: P = 0.000102

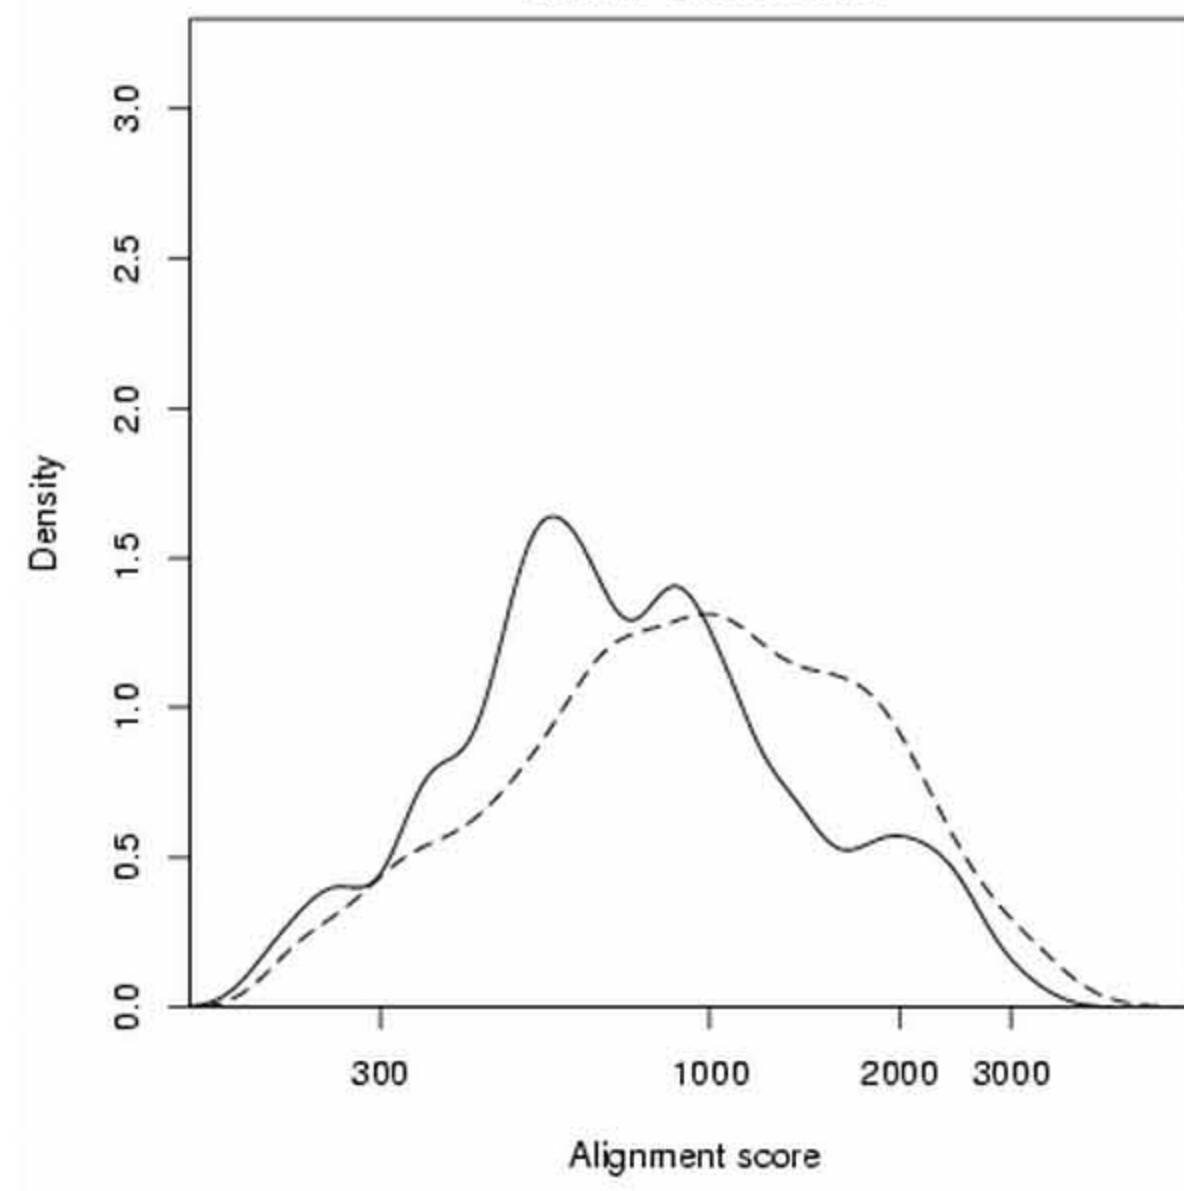

**electron transport**  
N = 151  
Low: P = 0.000236

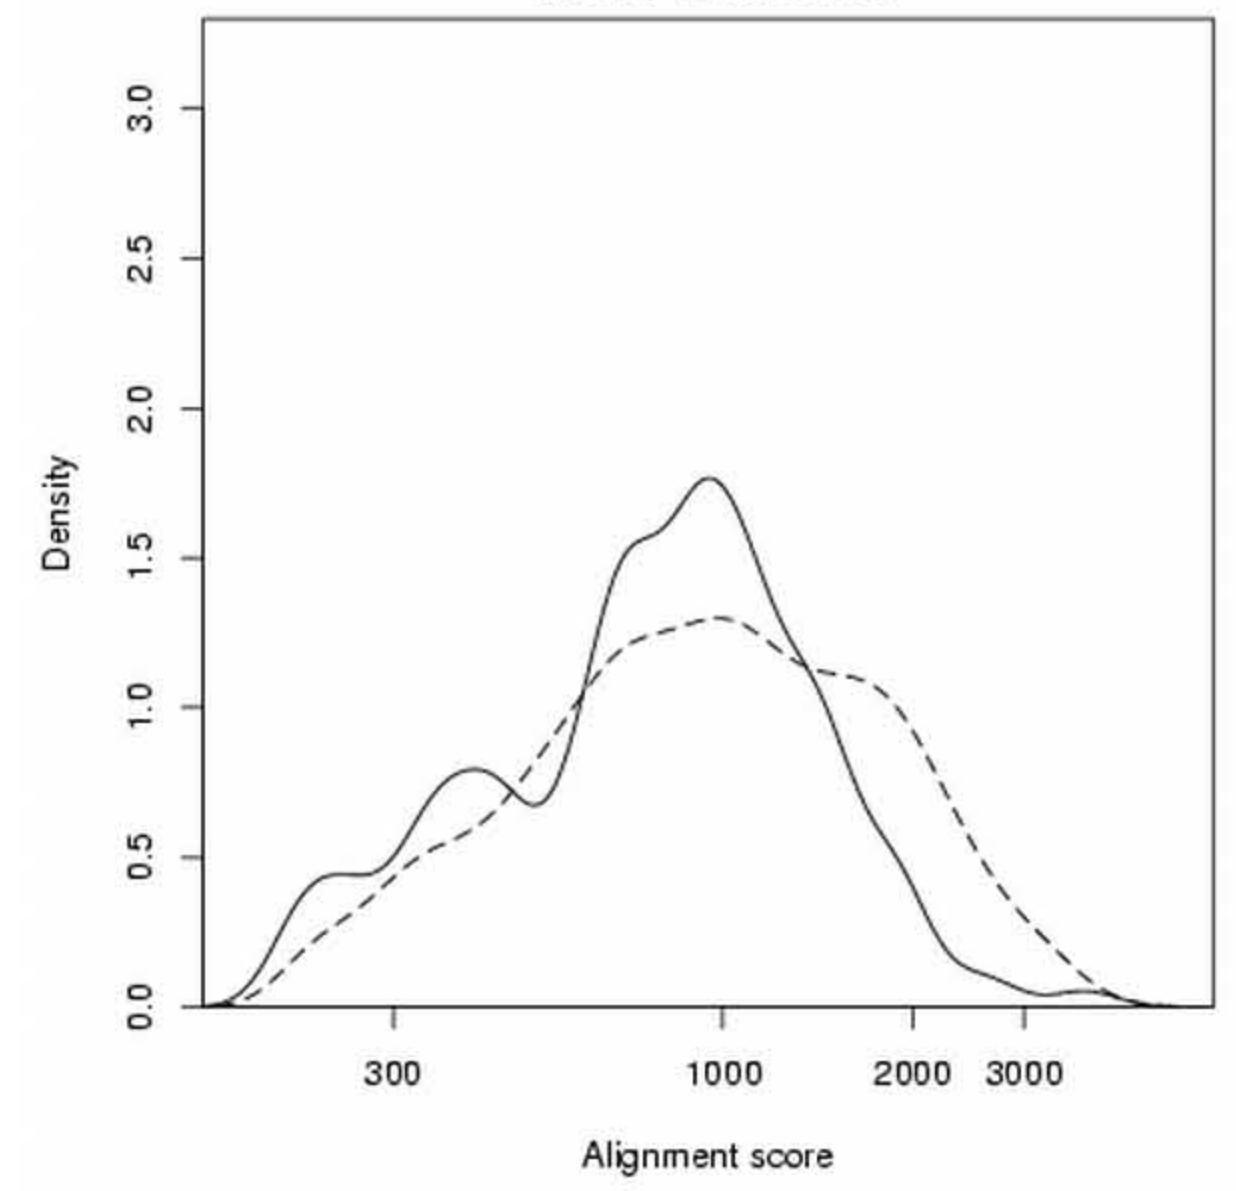

**catabolism**  
N = 260  
Low: P = 0.000251

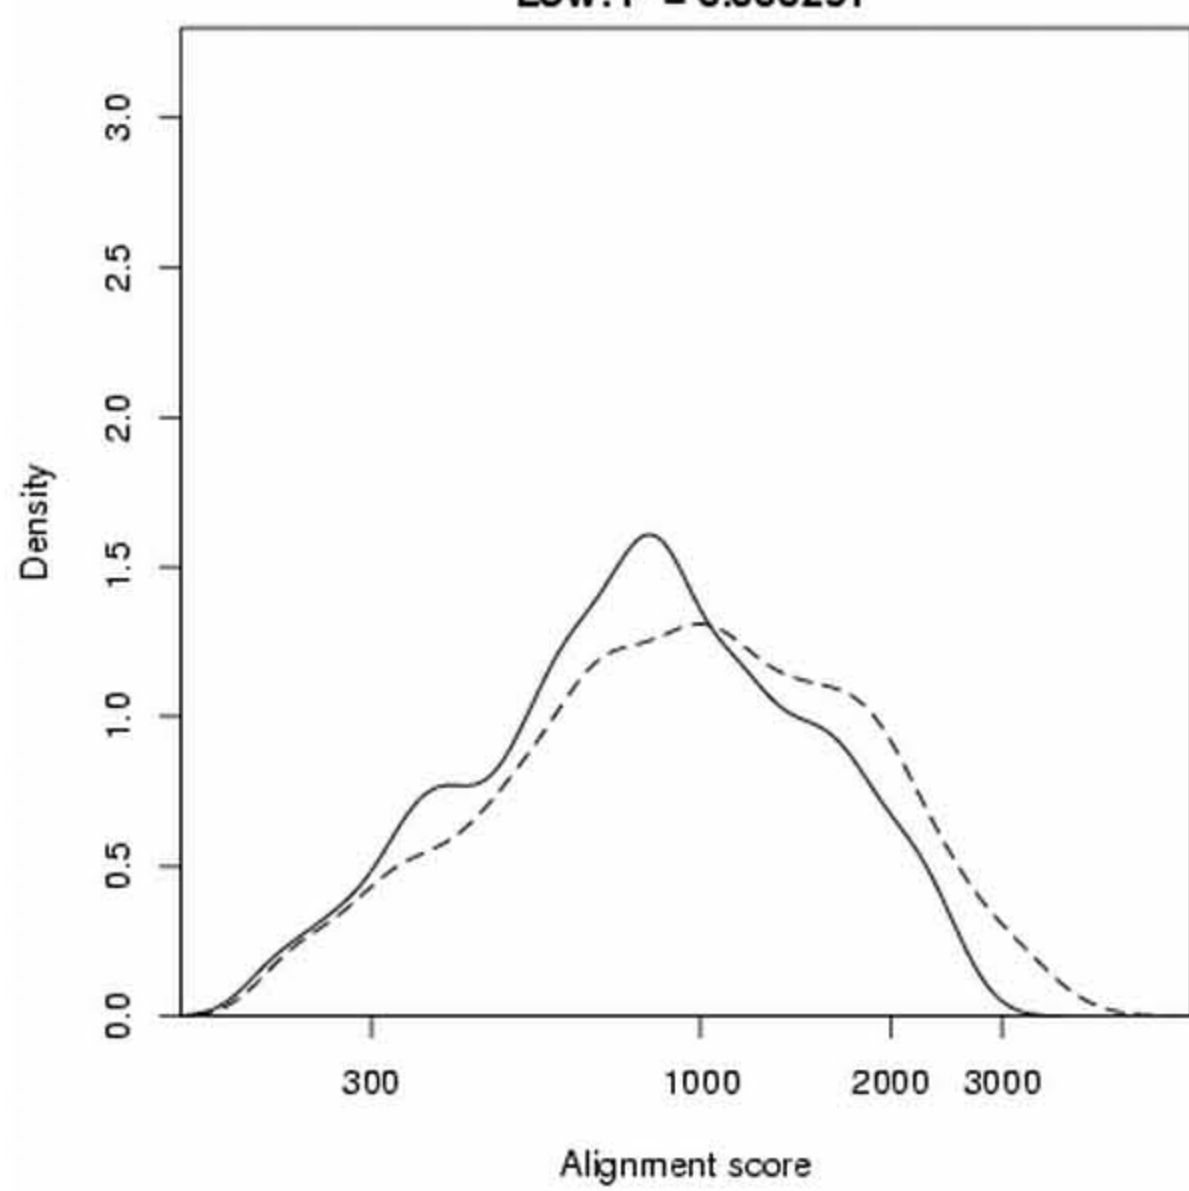

**carbohydrate metabolism**  
N = 220  
Low: P = 0.000278

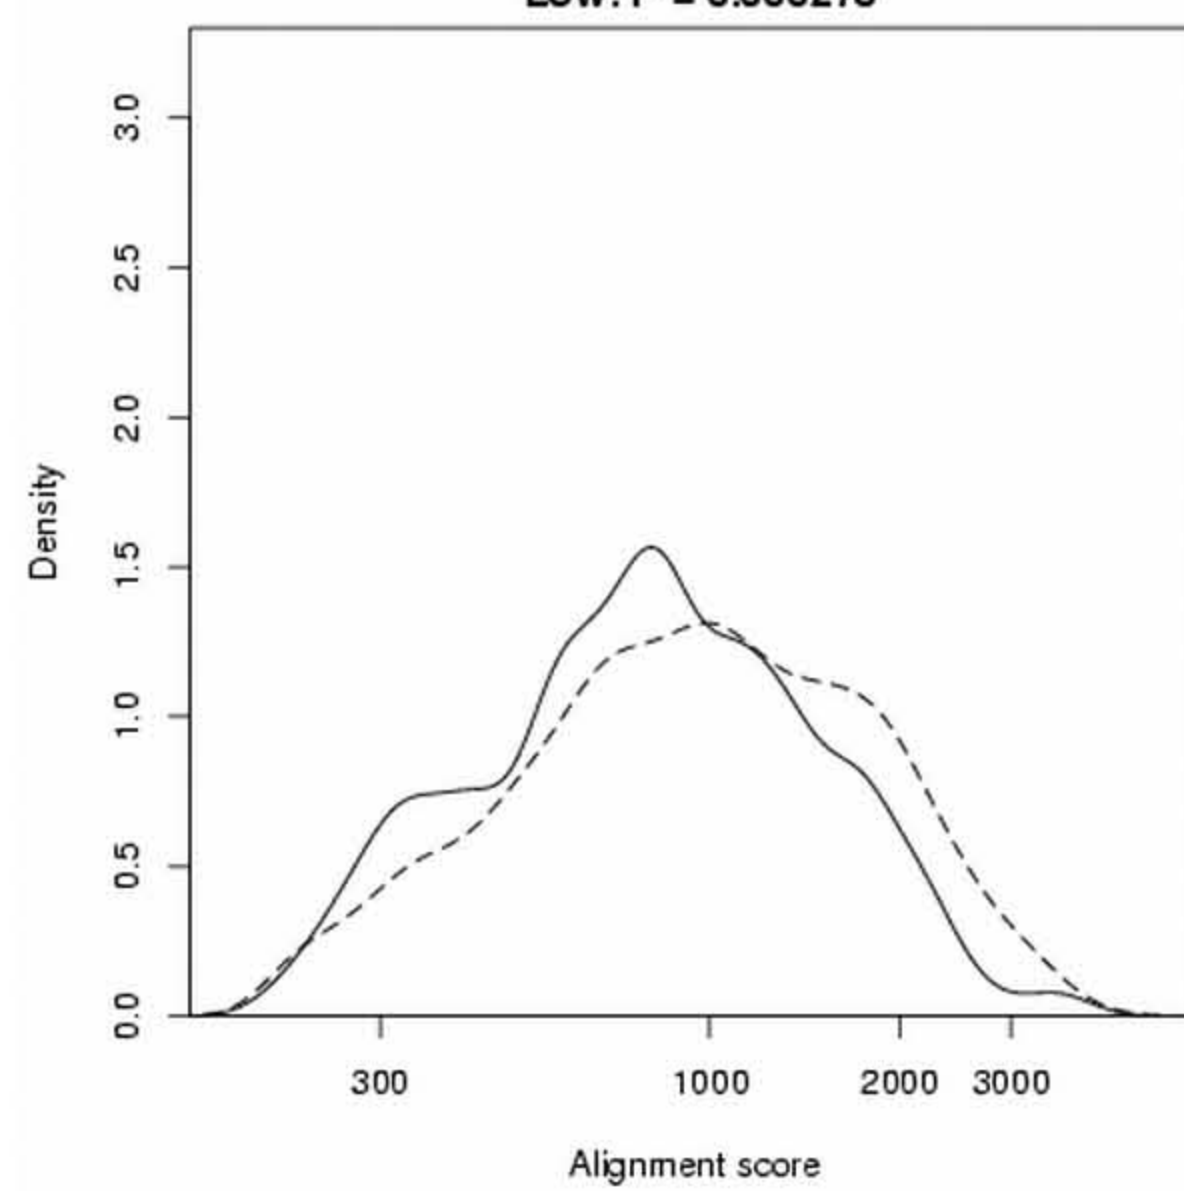

**peroxisome**  
N = 49  
Low: P = 0.000623

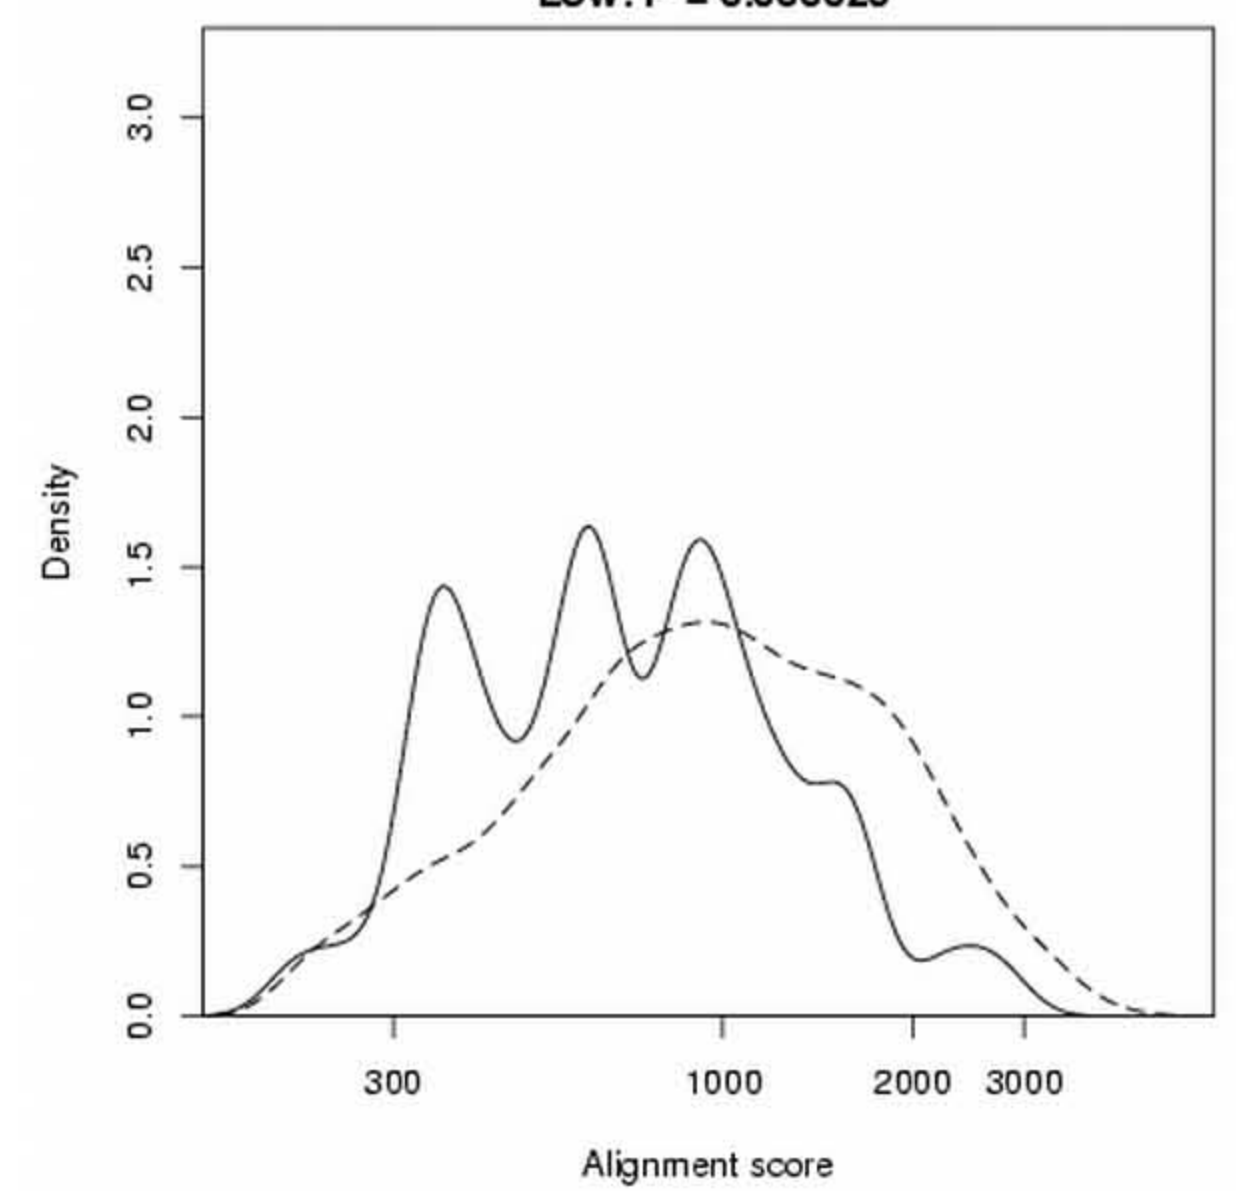

**protein biosynthesis**  
N = 283  
Low: P = 0.00063

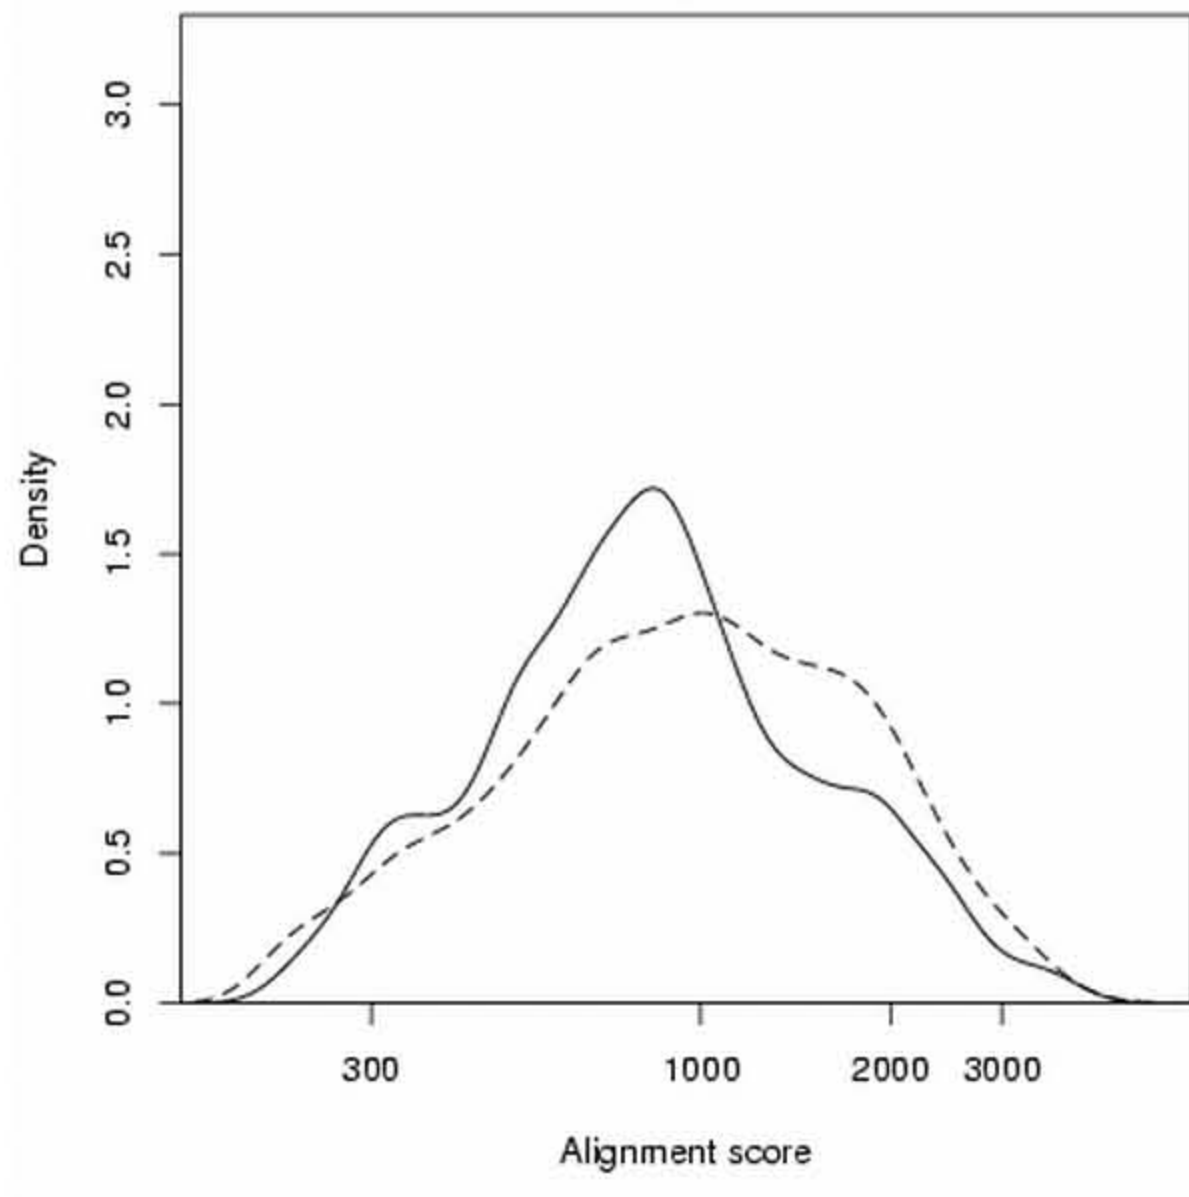

**nuclease activity**  
N = 60  
Low: P = 0.000772

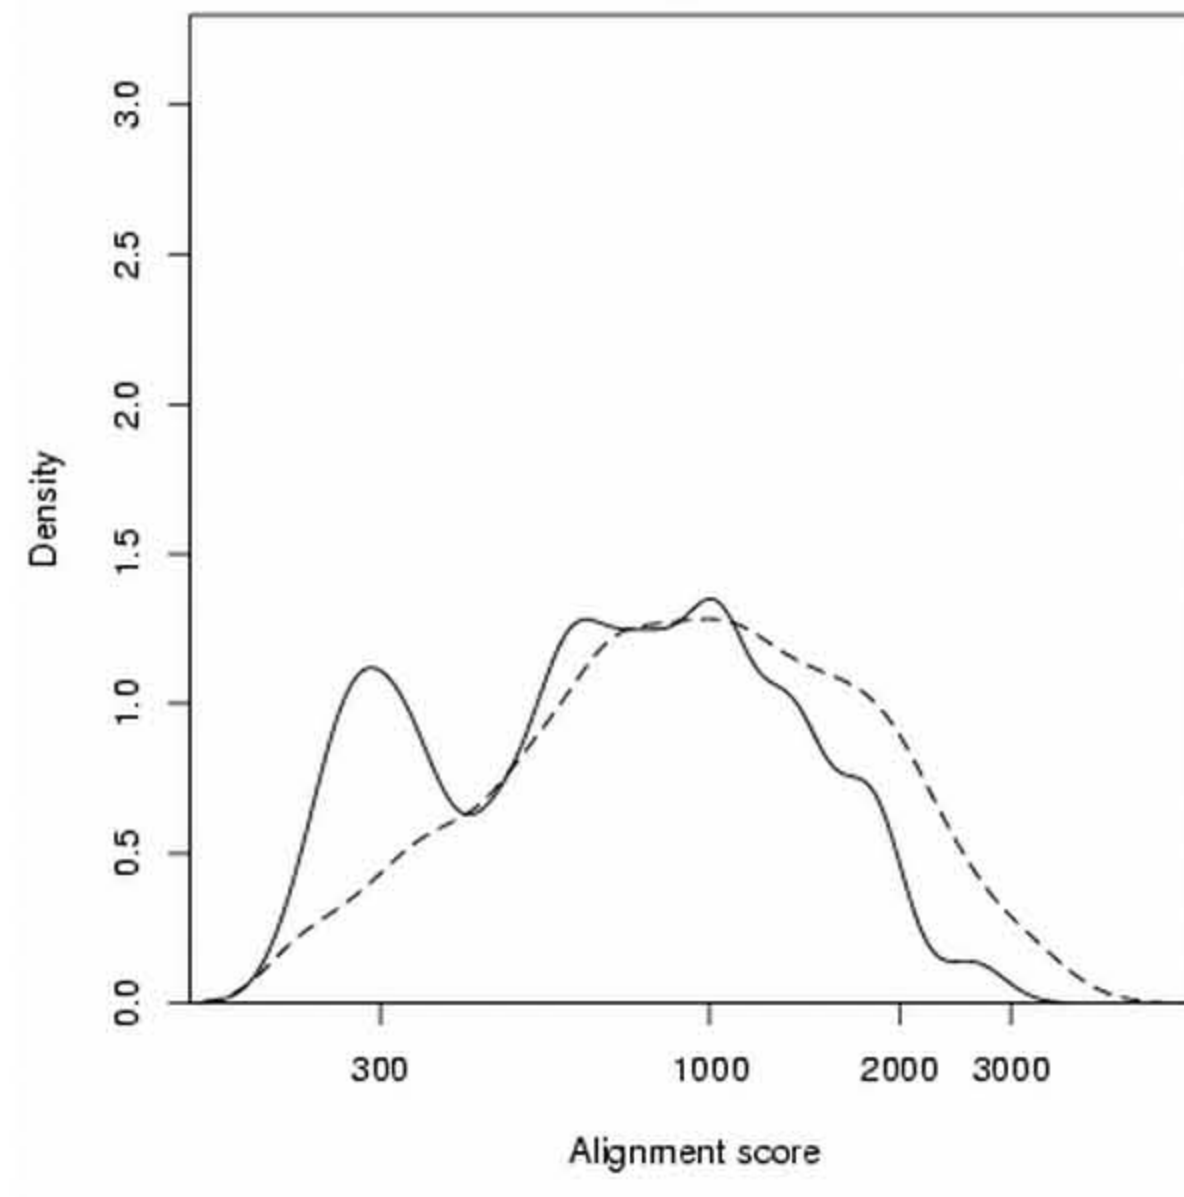

**response to biotic stimulus**  
N = 318  
Low: P = 0.000893

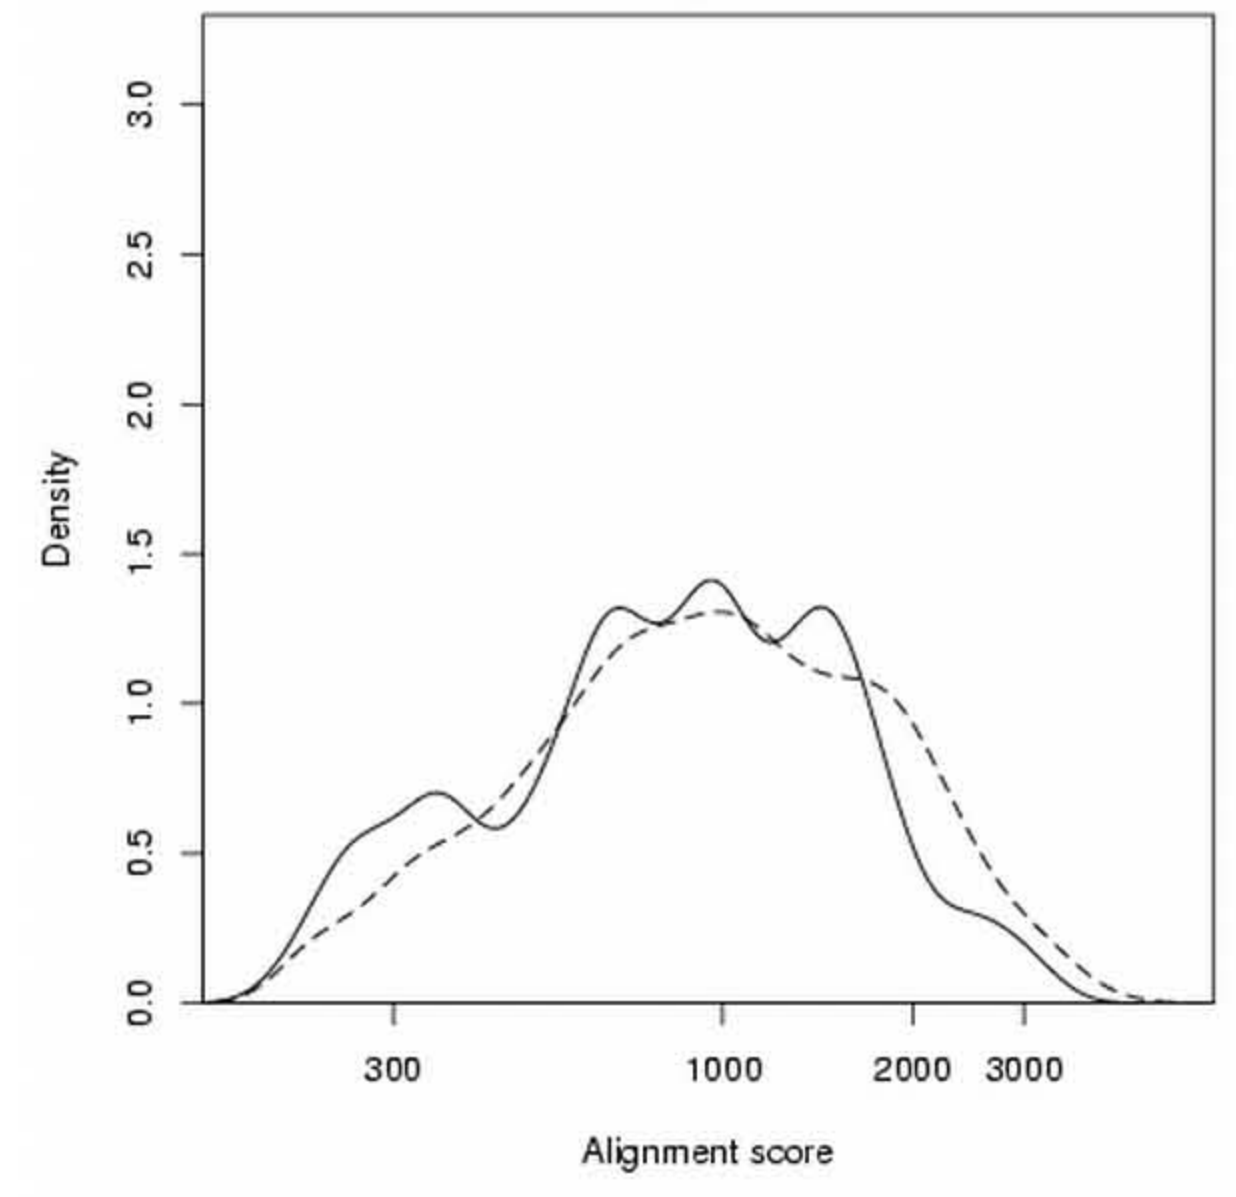

**nucleolus**  
N = 63  
Low: P = 0.00446

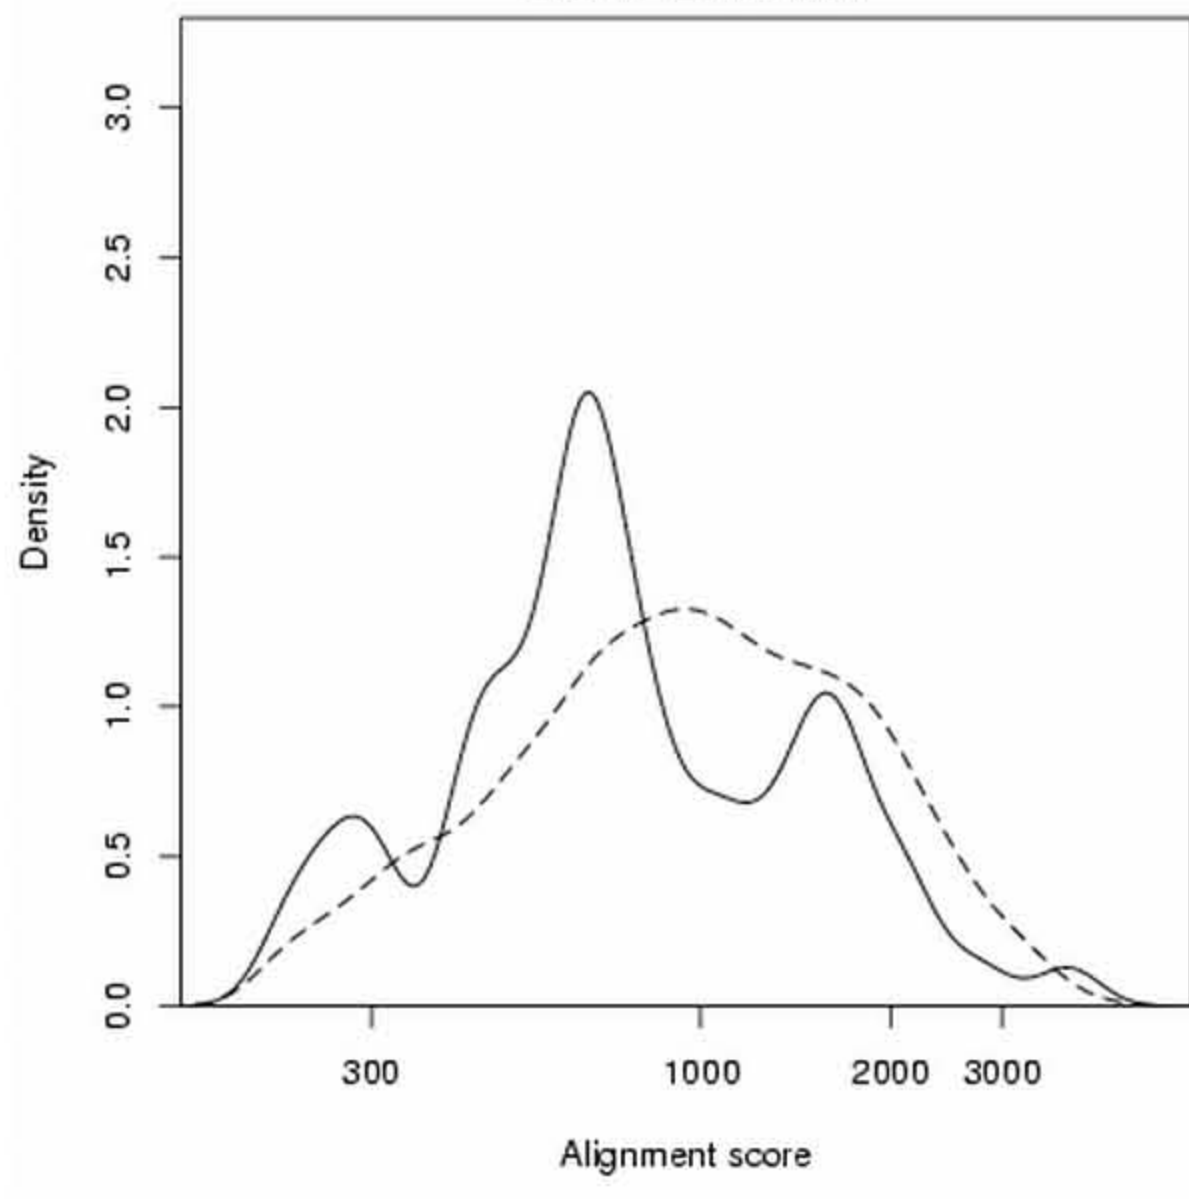

**Immune response**  
N = 270  
Low: P = 0.00544

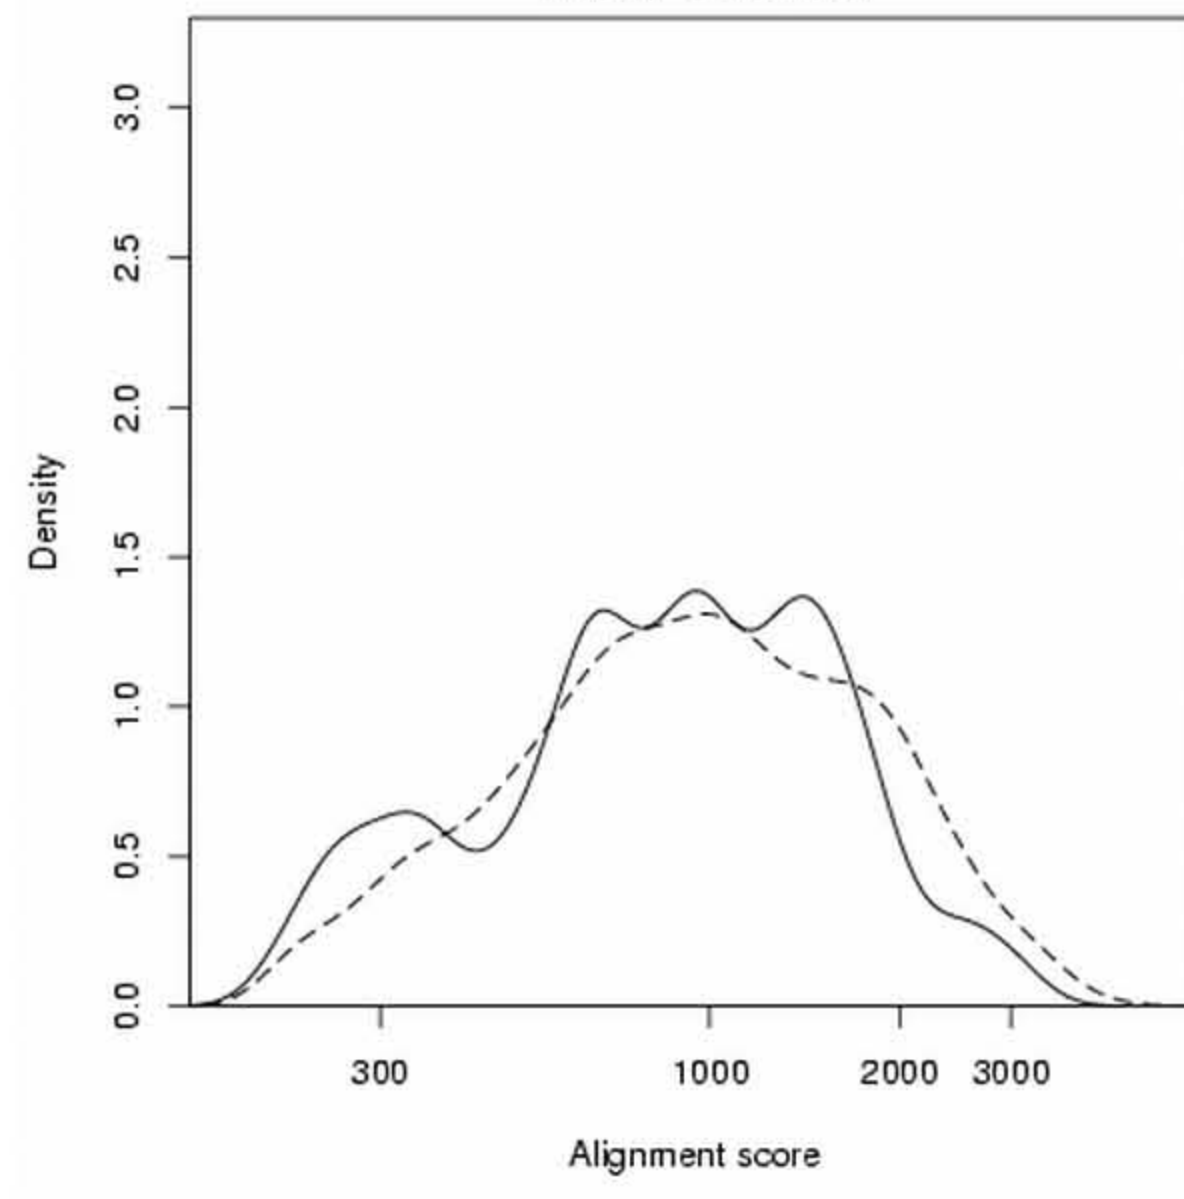

**Iron ion binding**  
N = 111  
Low: P = 0.0055

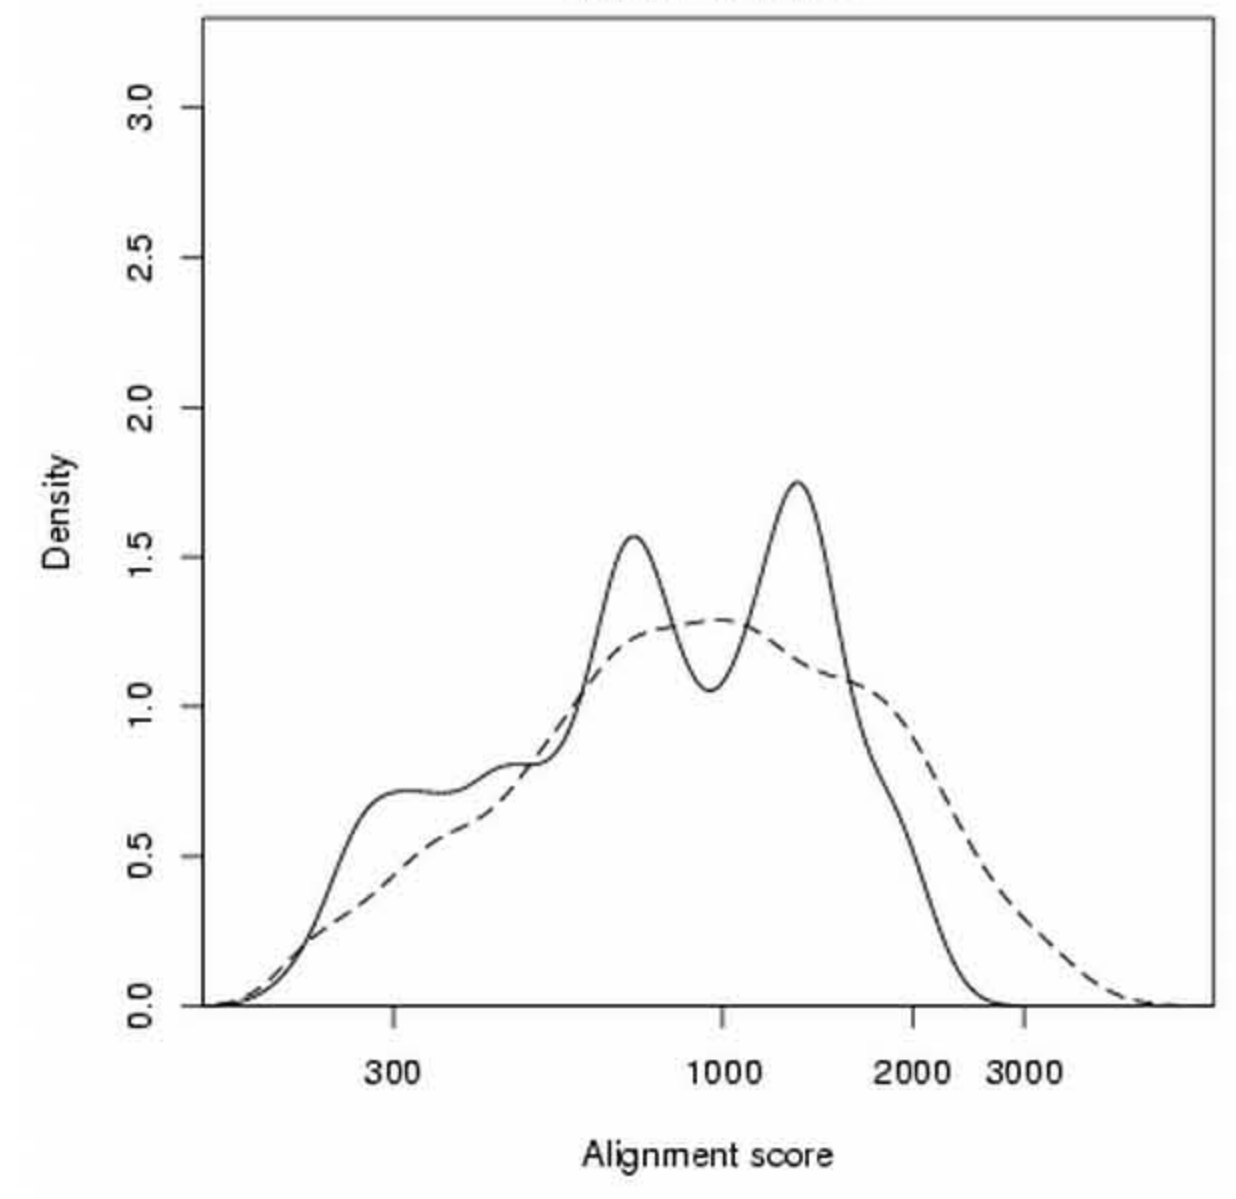

**peptidase activity**  
N = 227  
Low: P = 0.00559

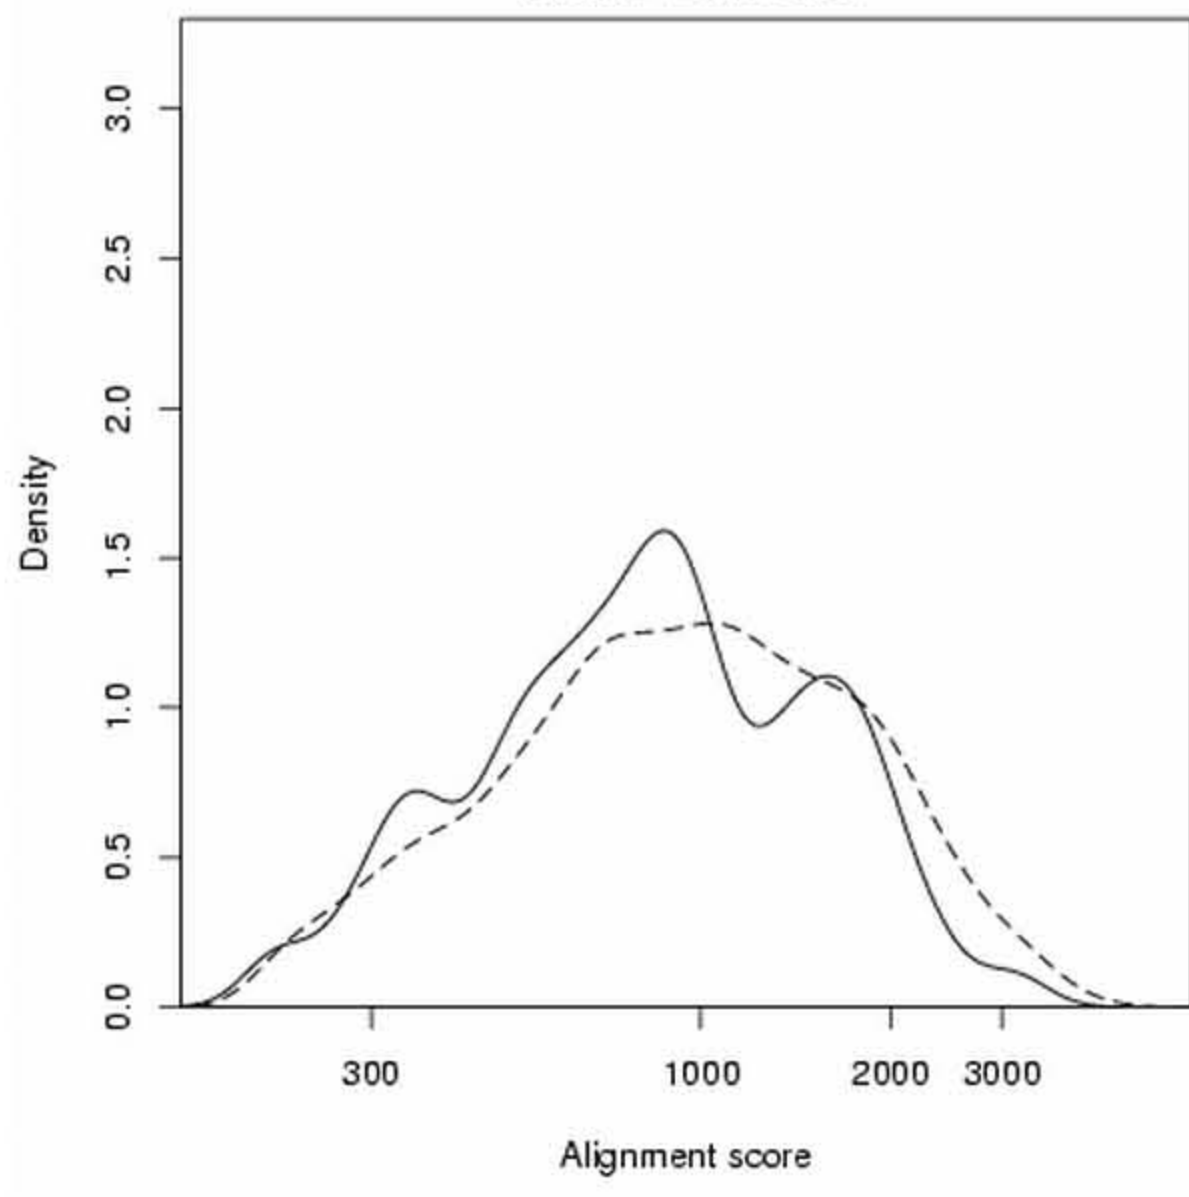

**proteolysis**  
N = 259  
Low: P = 0.00684

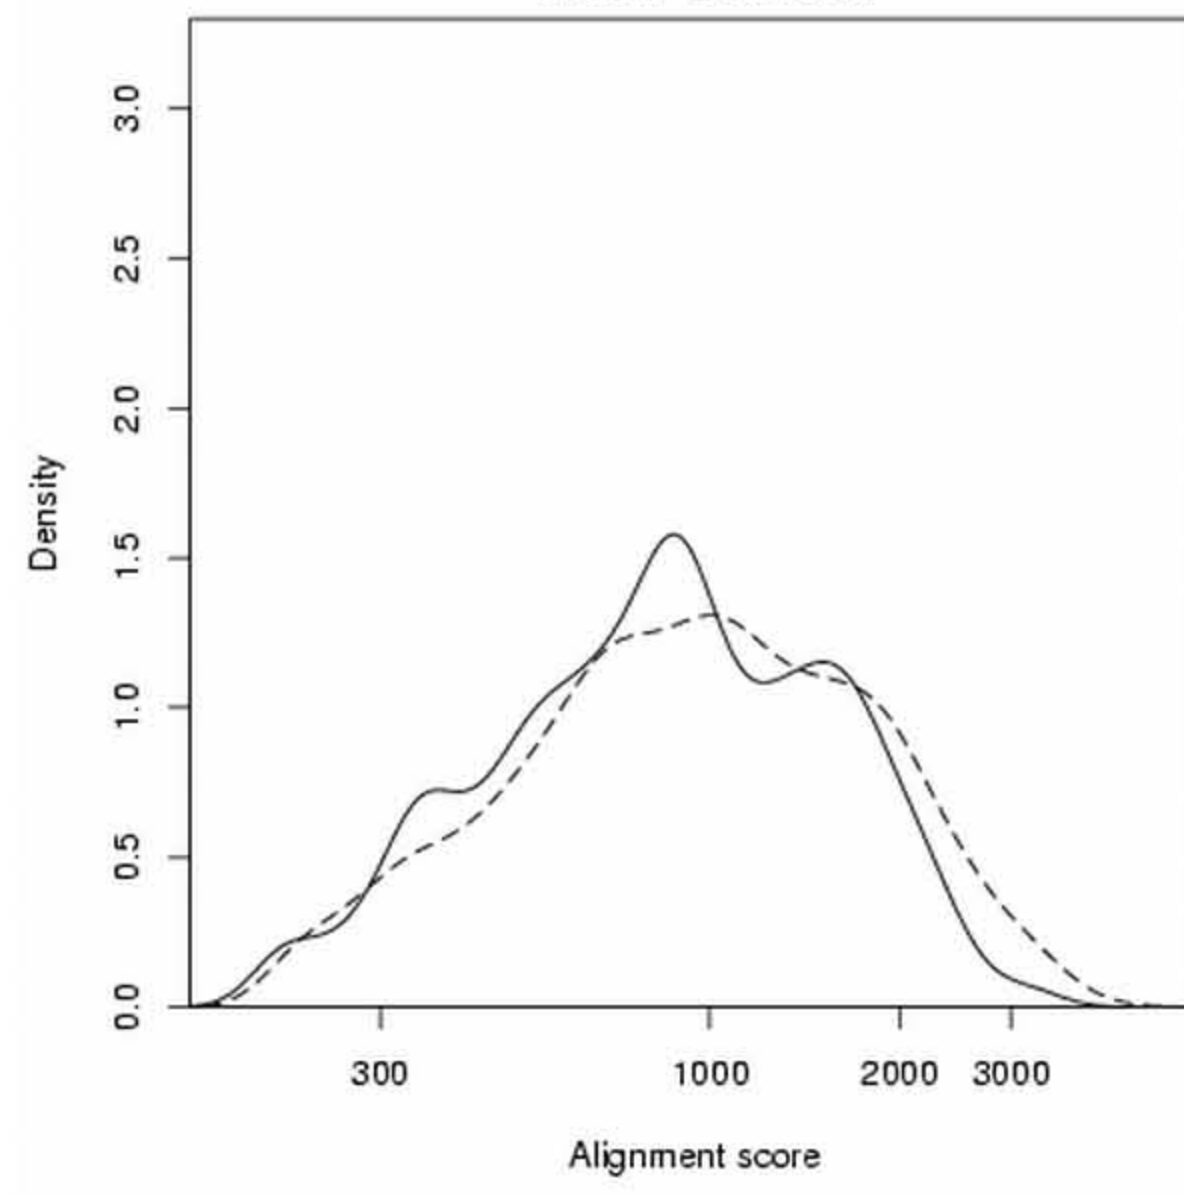

Supplement: 1471-2164-9-152-S4.pdf [file 1471-2164-9-152-S4.pdf]
