# Supplementary material for: Weak correlation between sequence conservation in promoter regions and in protein-coding regions of human-mouse orthologous gene pairs
Source: PubMed Central journal article supplement (PMC2335122; doi:10.1186/1471-2164-9-152), 2008-04-02

A

**GTPase activity**  
N = 88  
High: P = 0

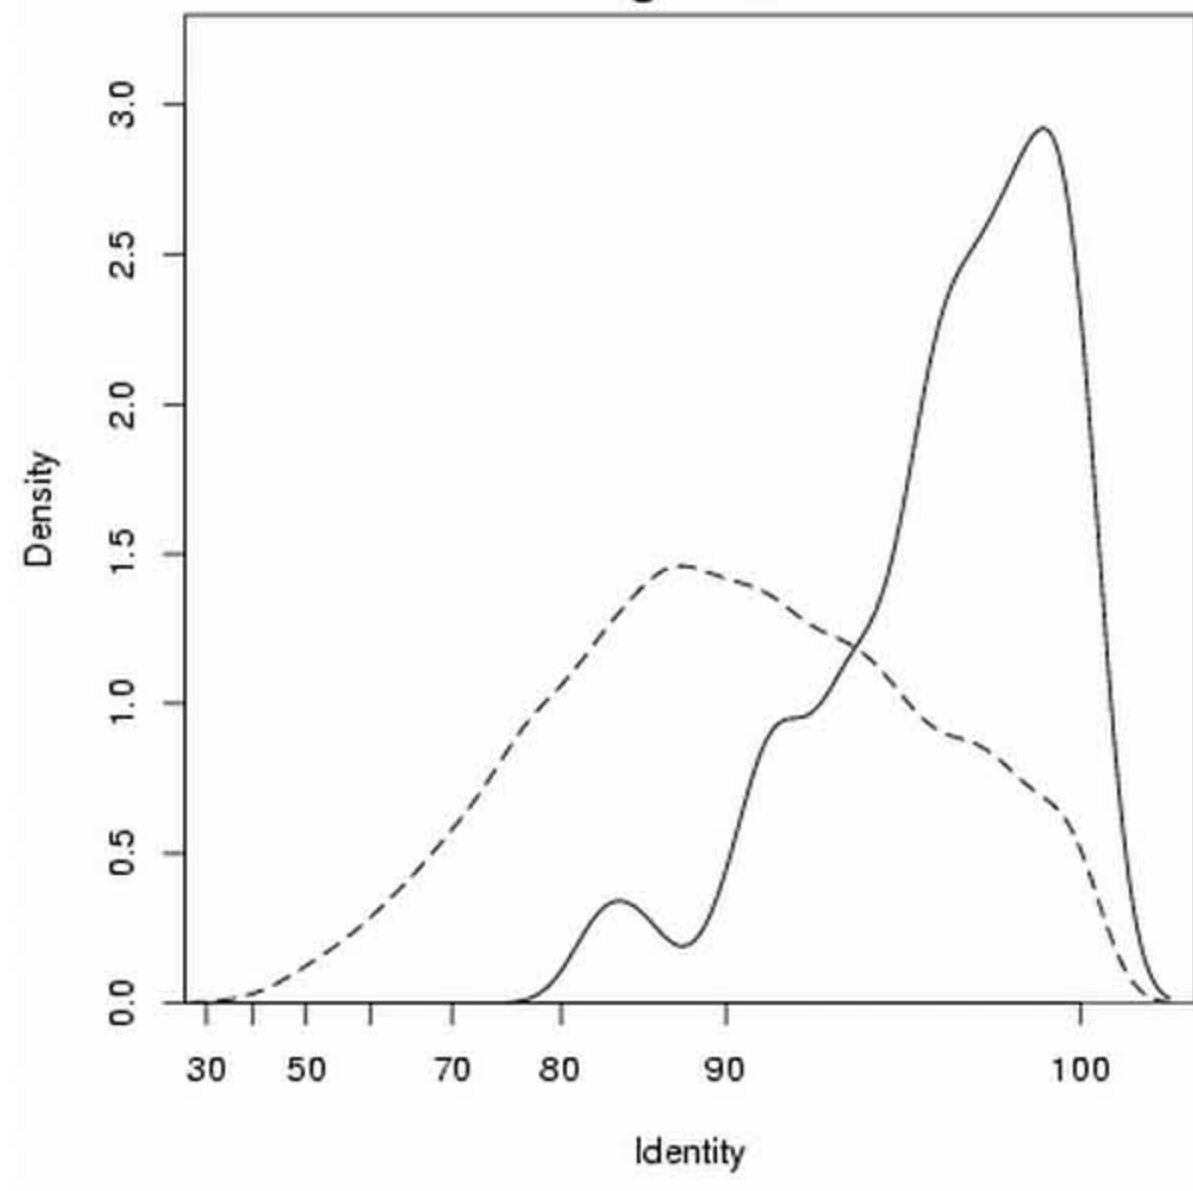

**GTP binding**  
N = 160  
High: P = 0

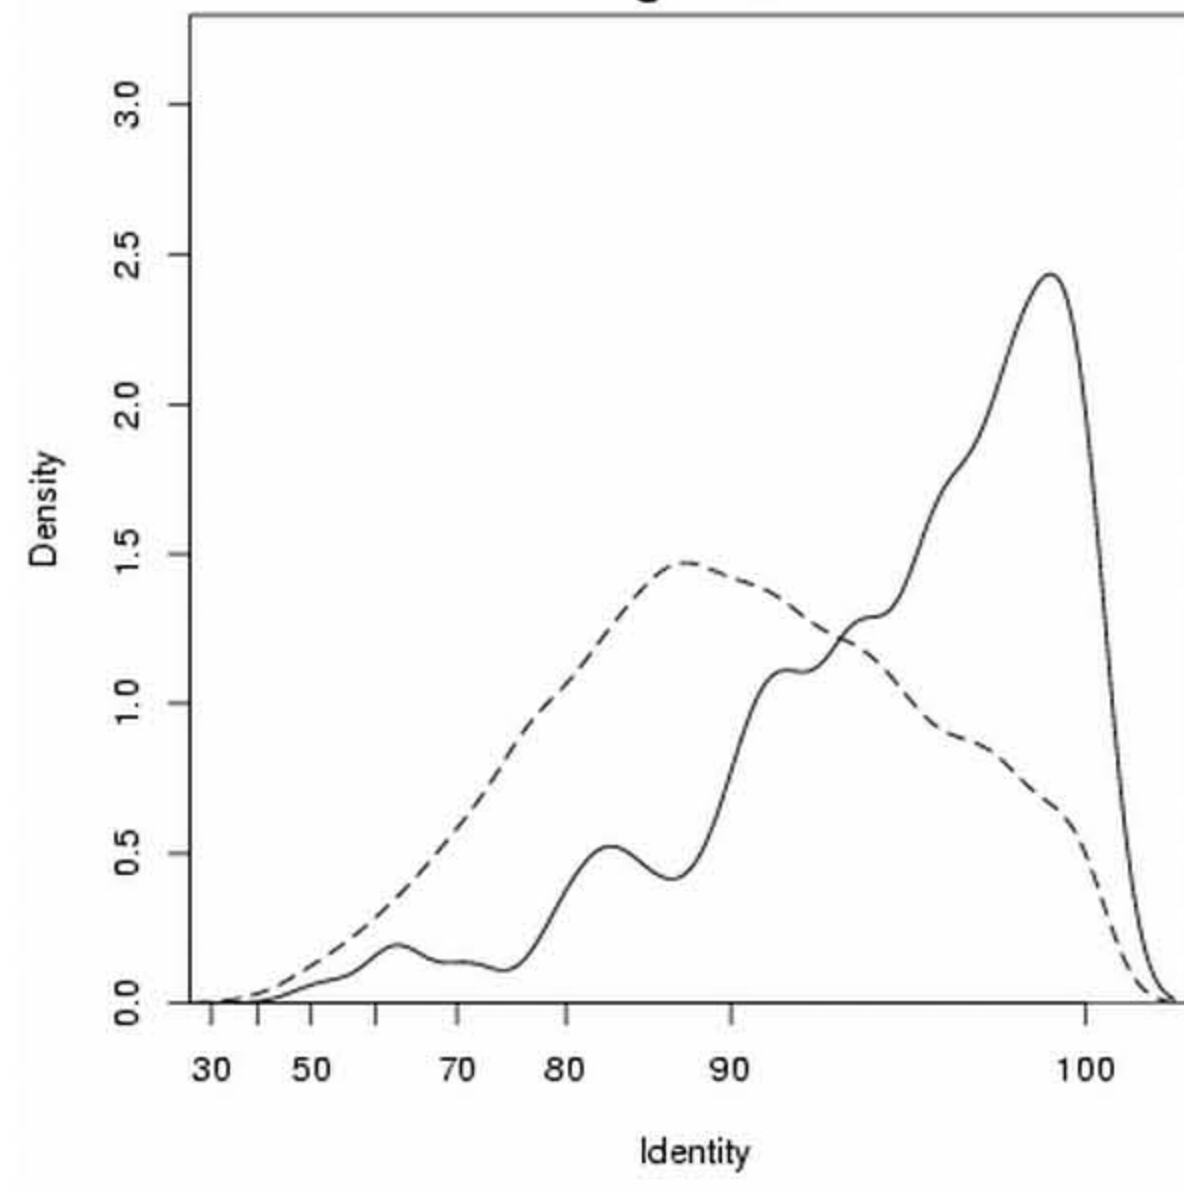

**pyrophosphatase activity**  
N = 254  
High: P = 0

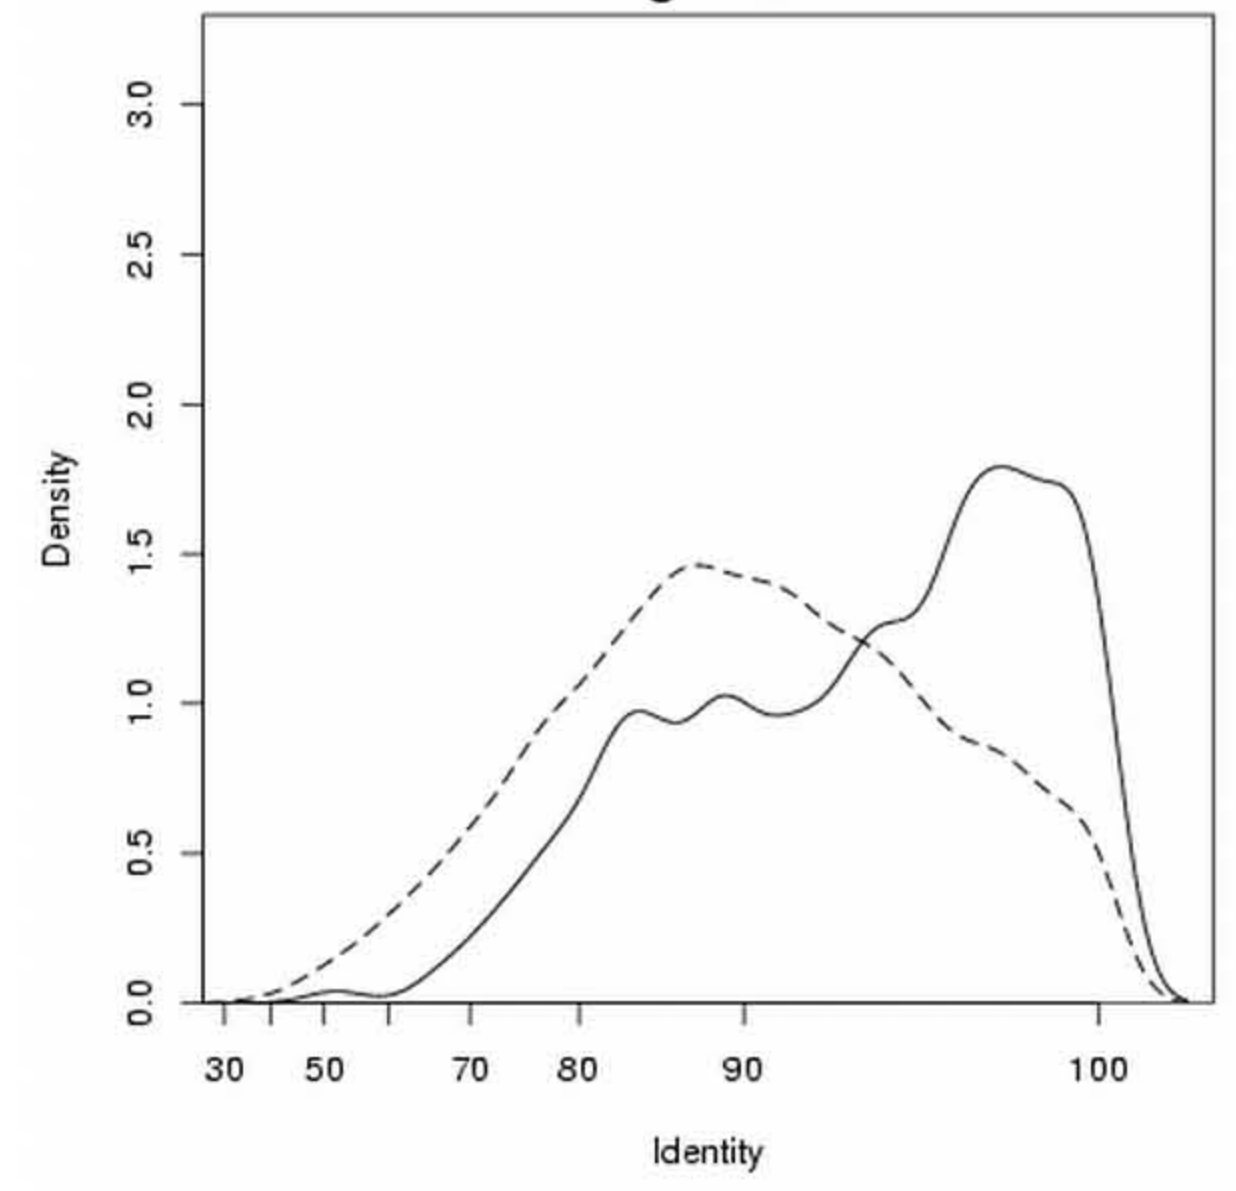

**Intracellular transport**  
N = 350  
High: P = 0

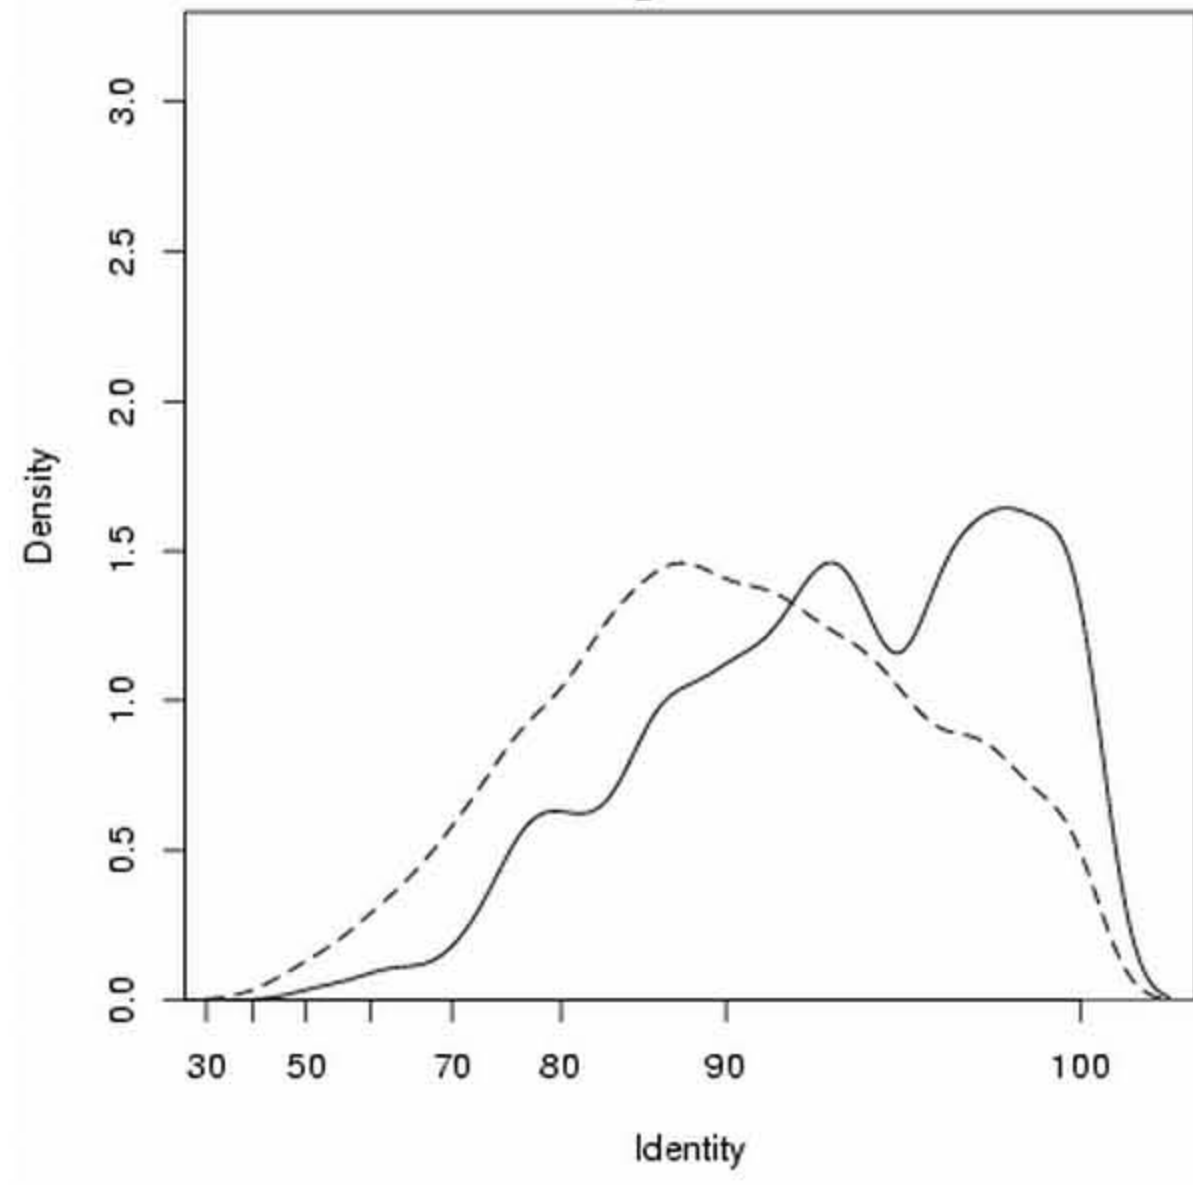

**small GTPase mediated signal transduction**  
N = 126  
High: P = 1.11e-16

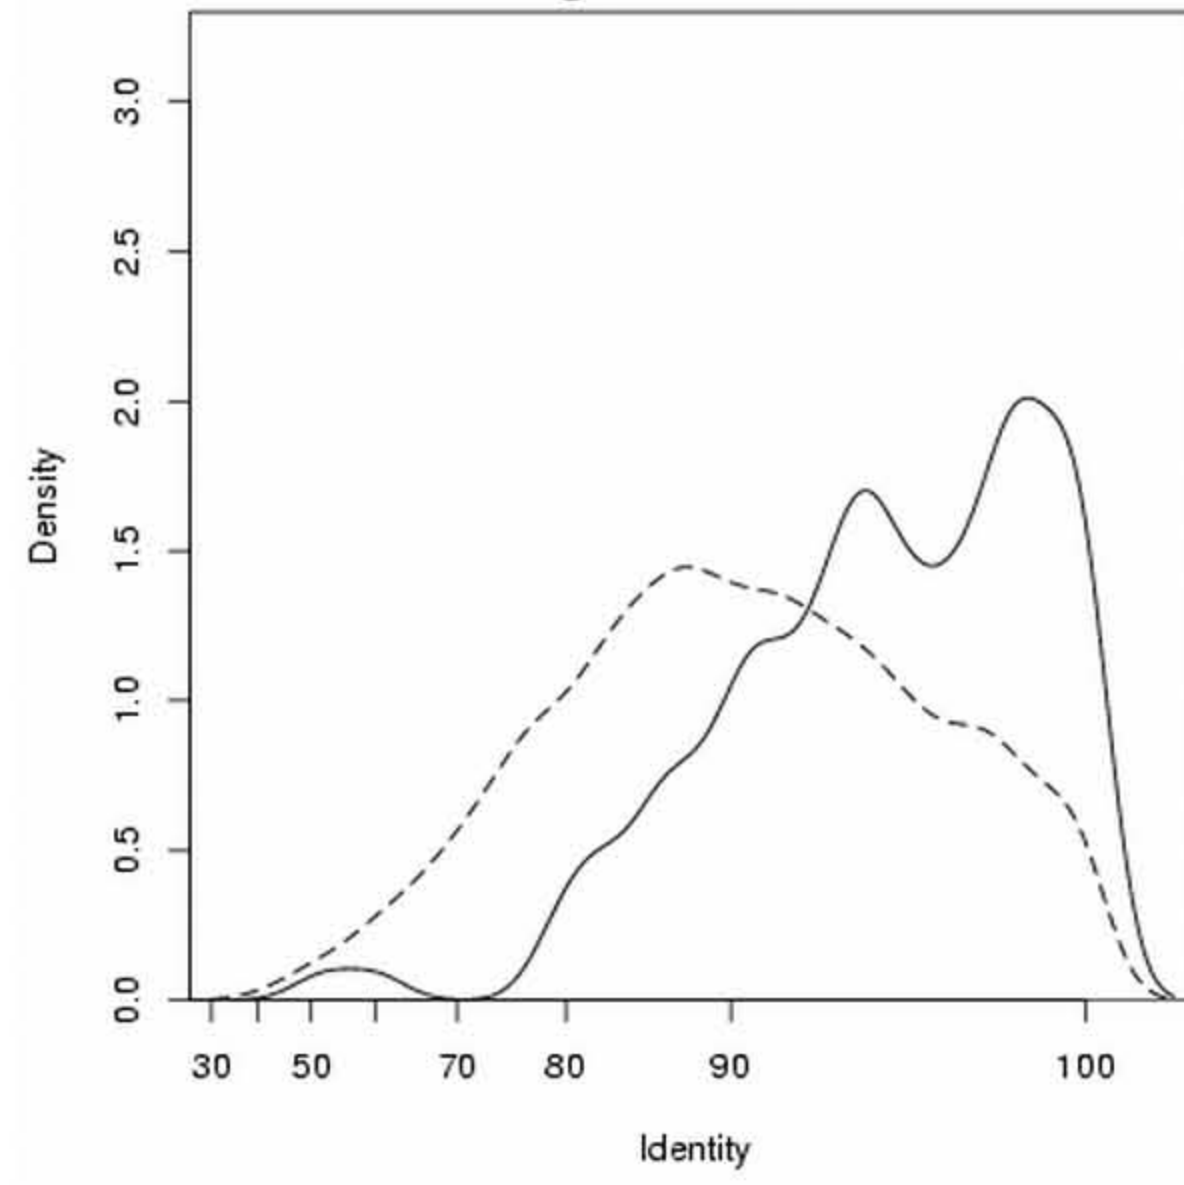

**RNA binding**  
N = 290  
High: P = 1.33e-15

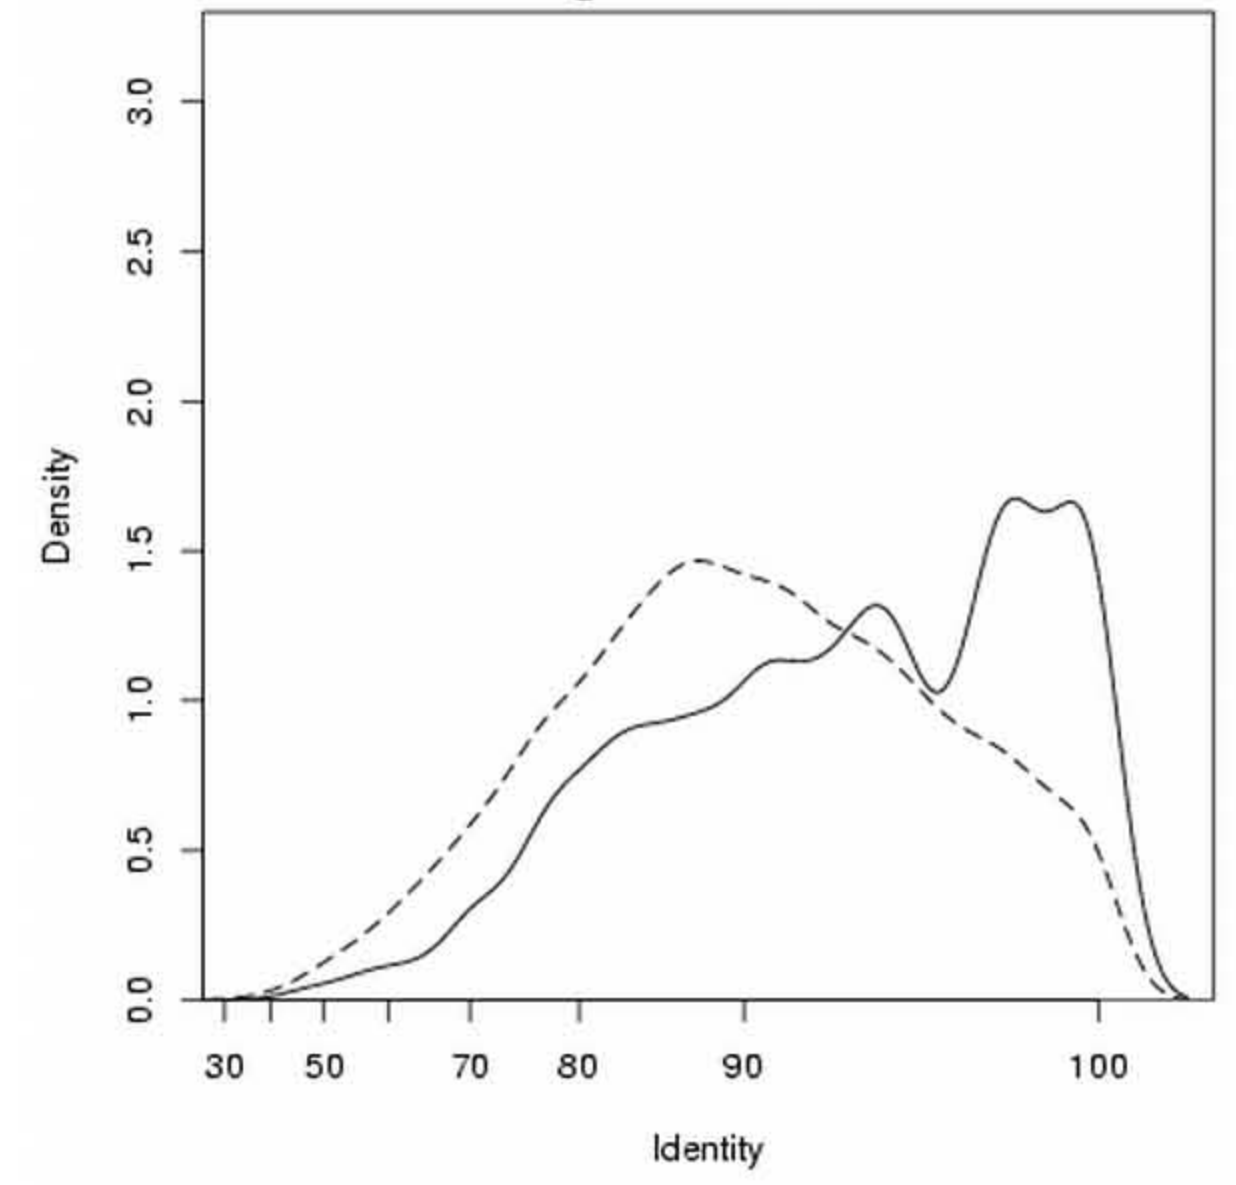

**cytosol**  
N = 171  
High: P = 3.7e-11

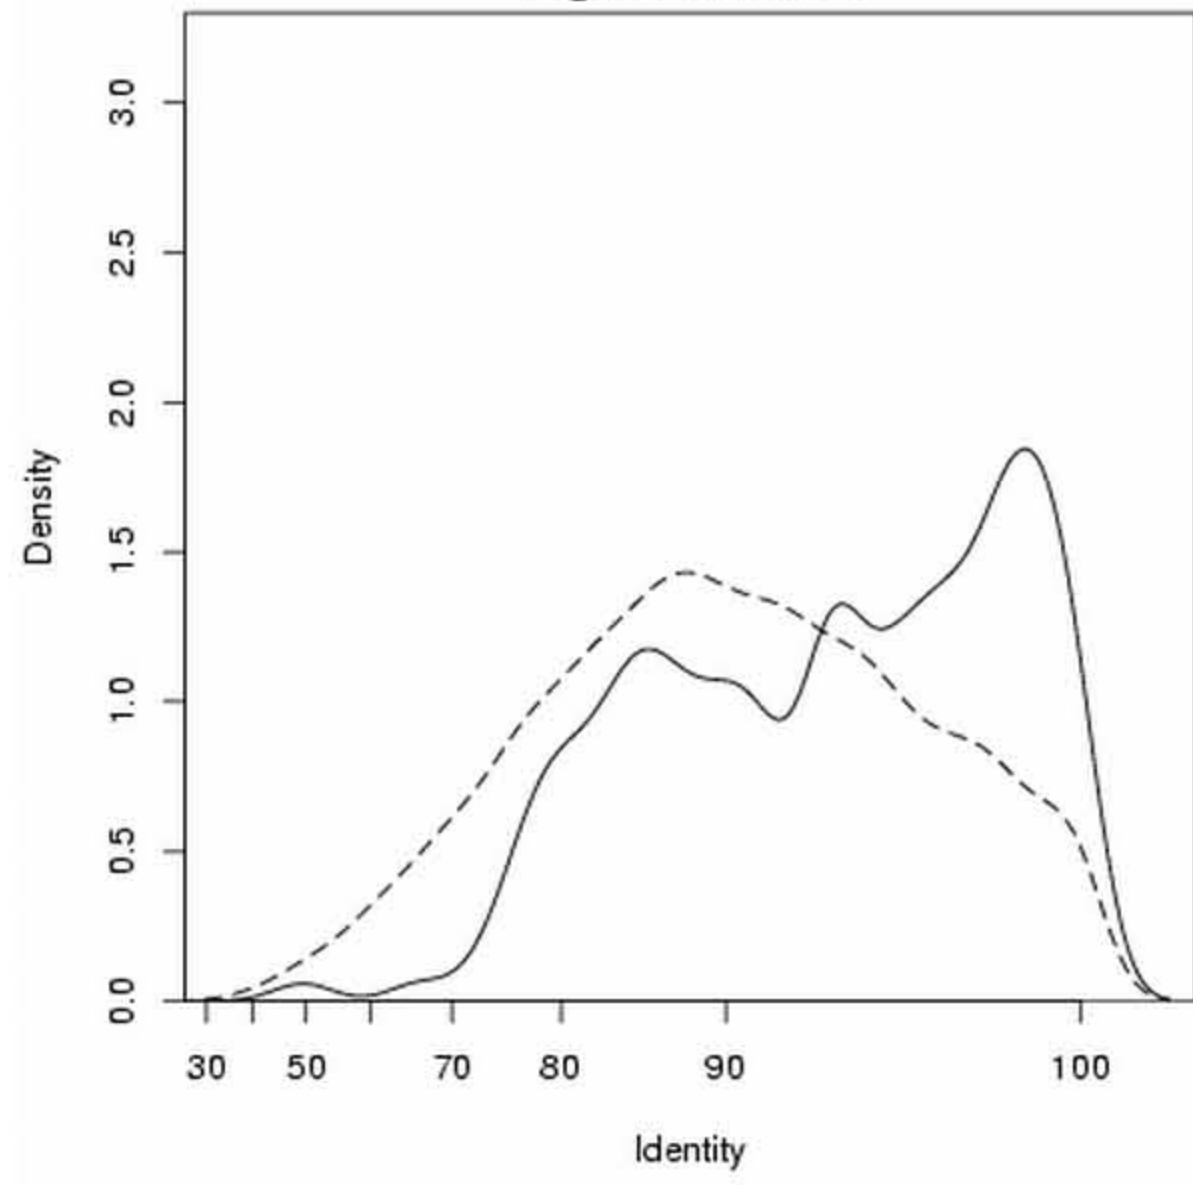

**RNA processing**  
N = 198  
High: P = 3.25e-10

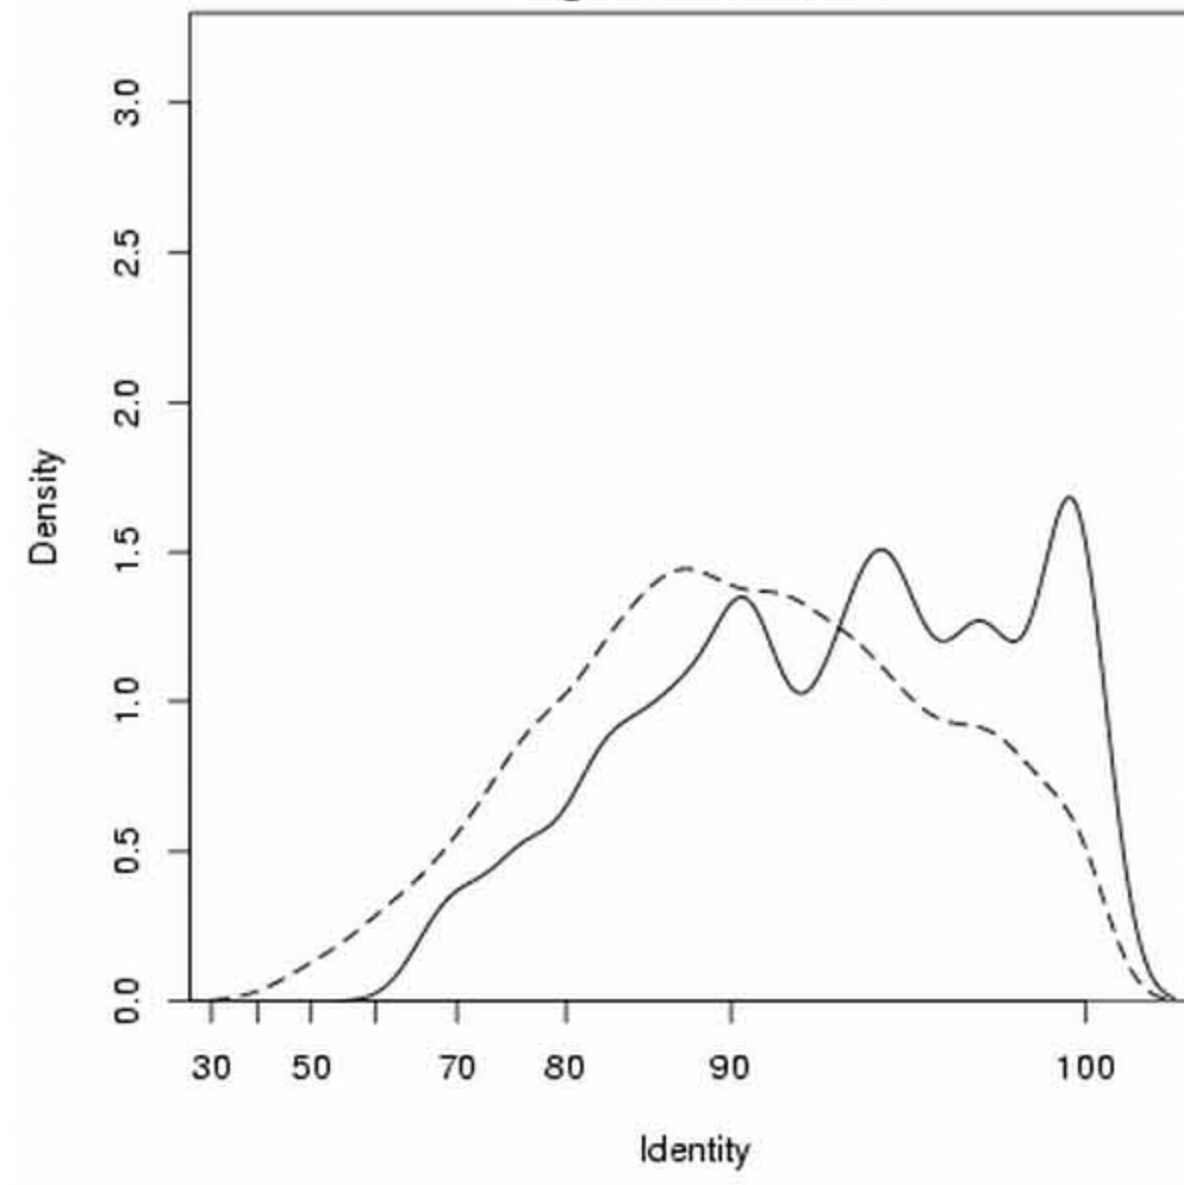

**Golgi apparatus**  
N = 216  
High: P = 5.63e-10

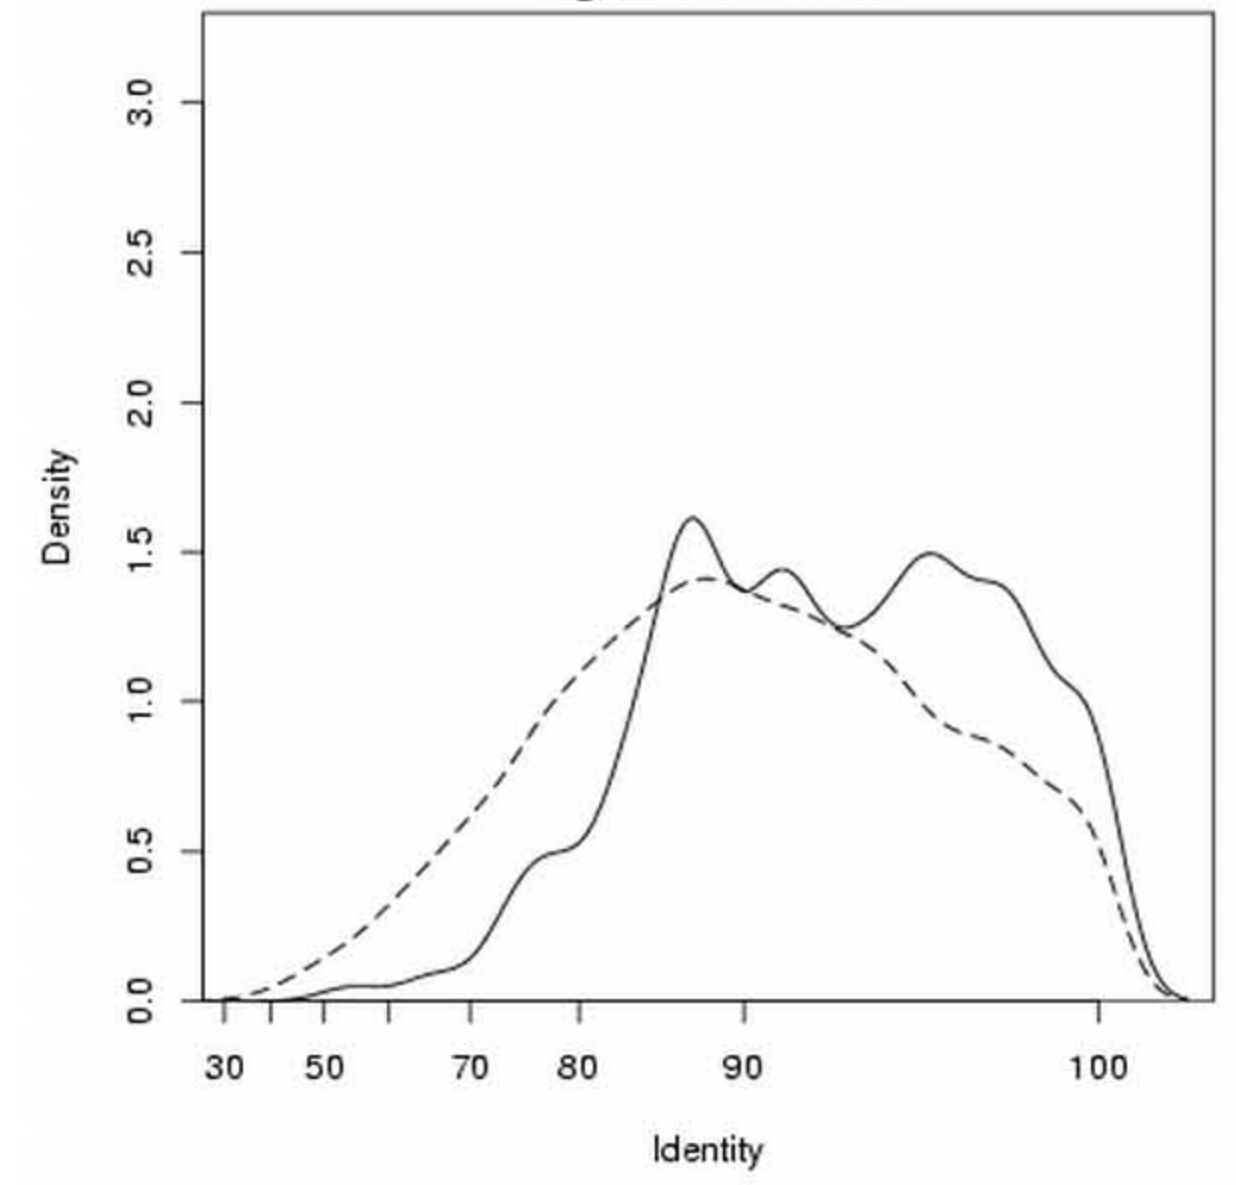

**Intracellular signaling cascade**  
N = 431  
High: P = 2.57e-09

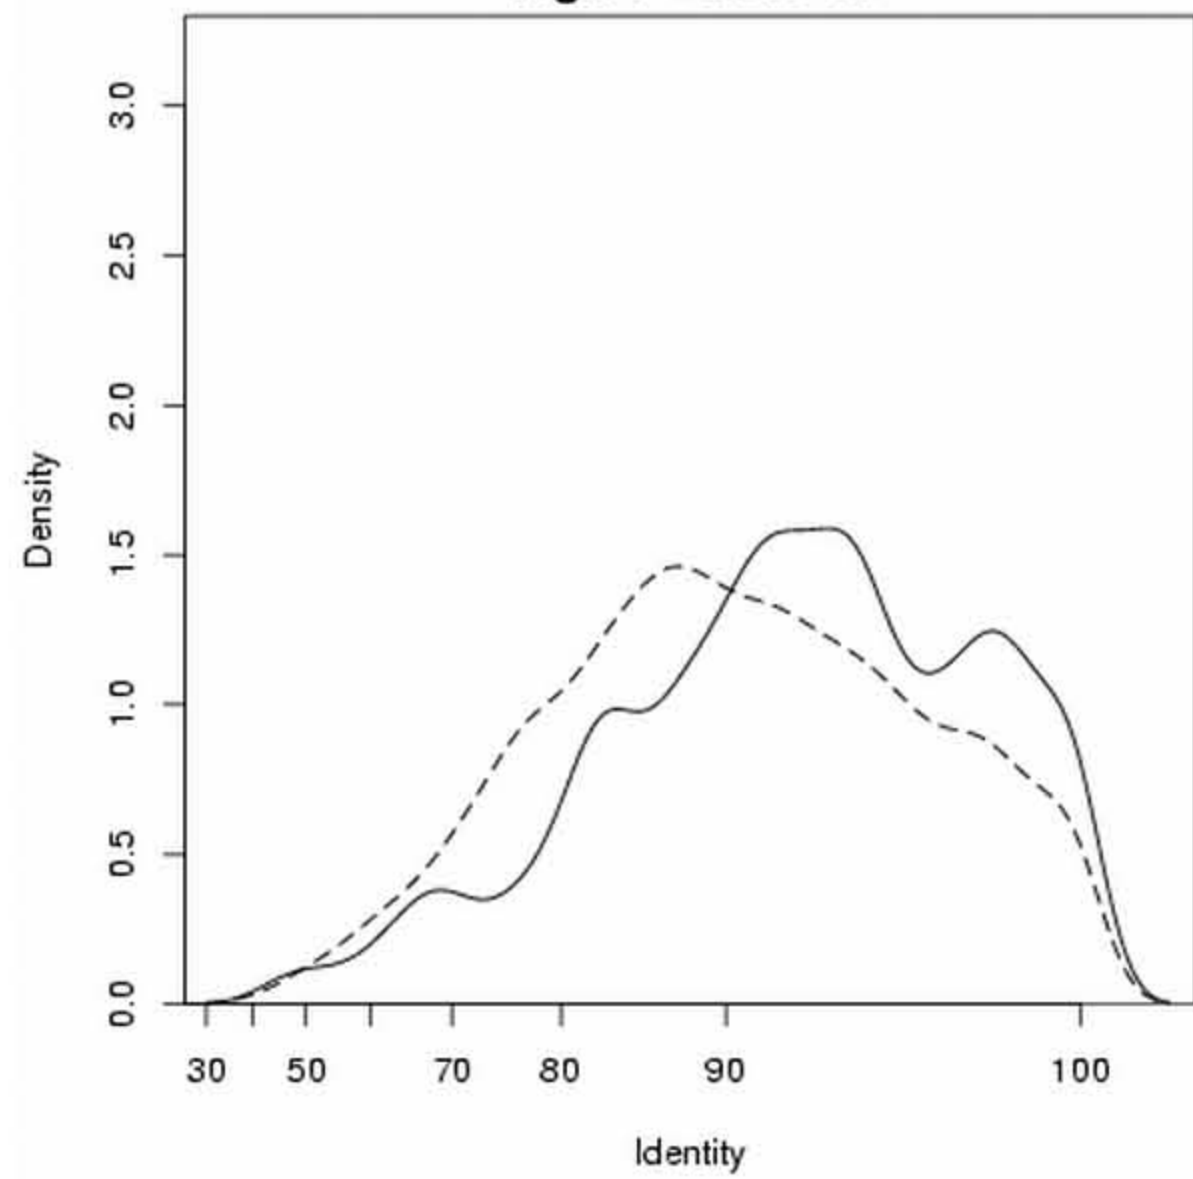

**transcription**  
N = 640  
High: P = 1.76e-08

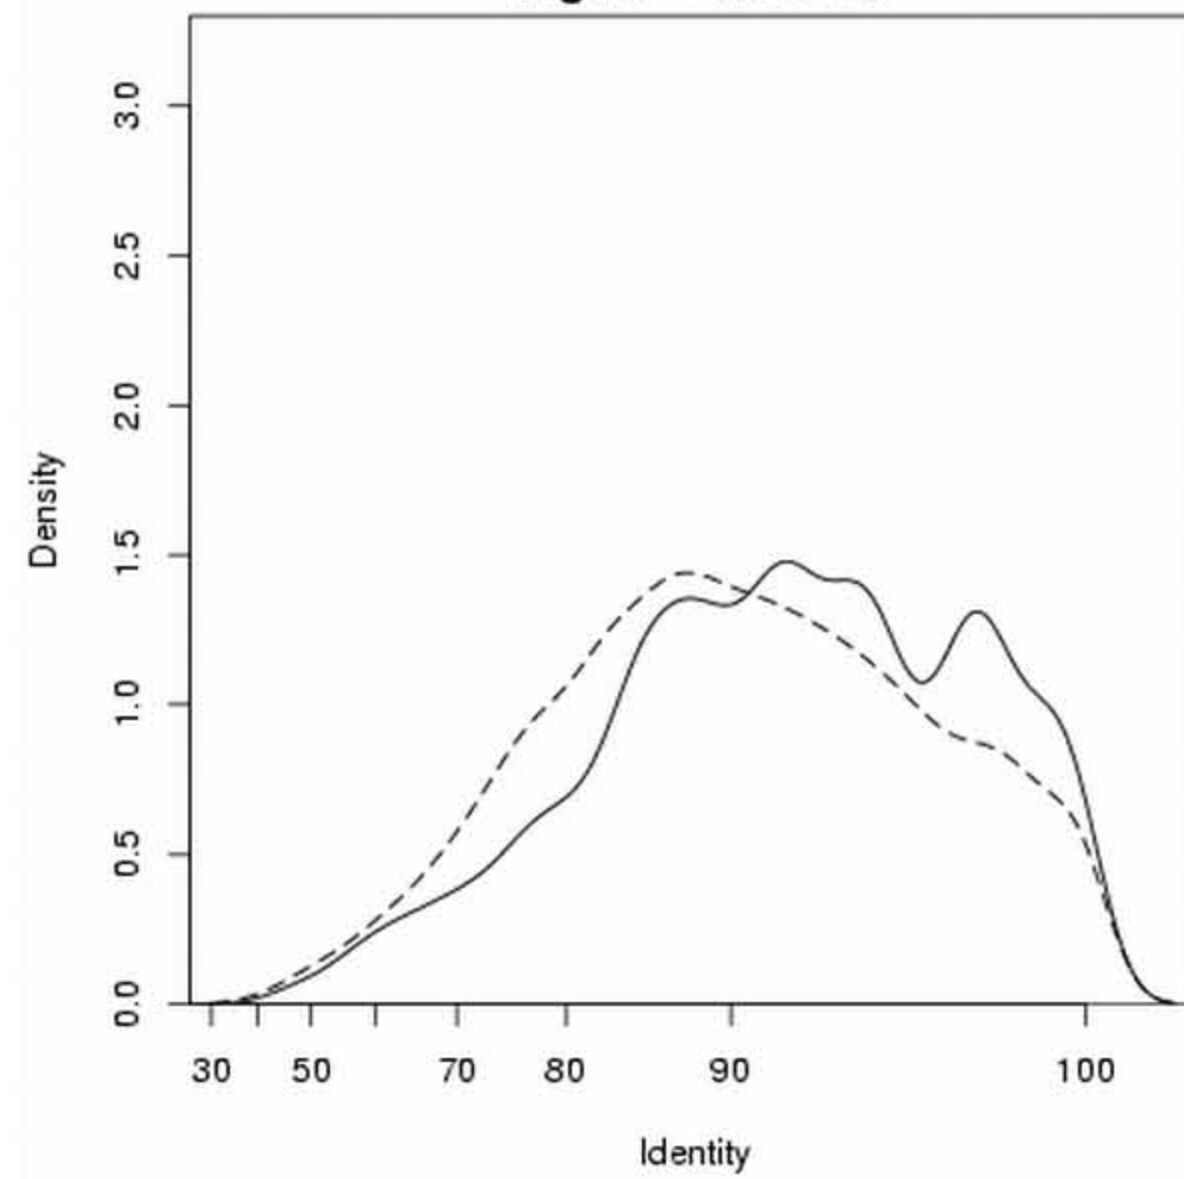

**regulation of transcription**  
N = 602  
High: P = 2.02e-08

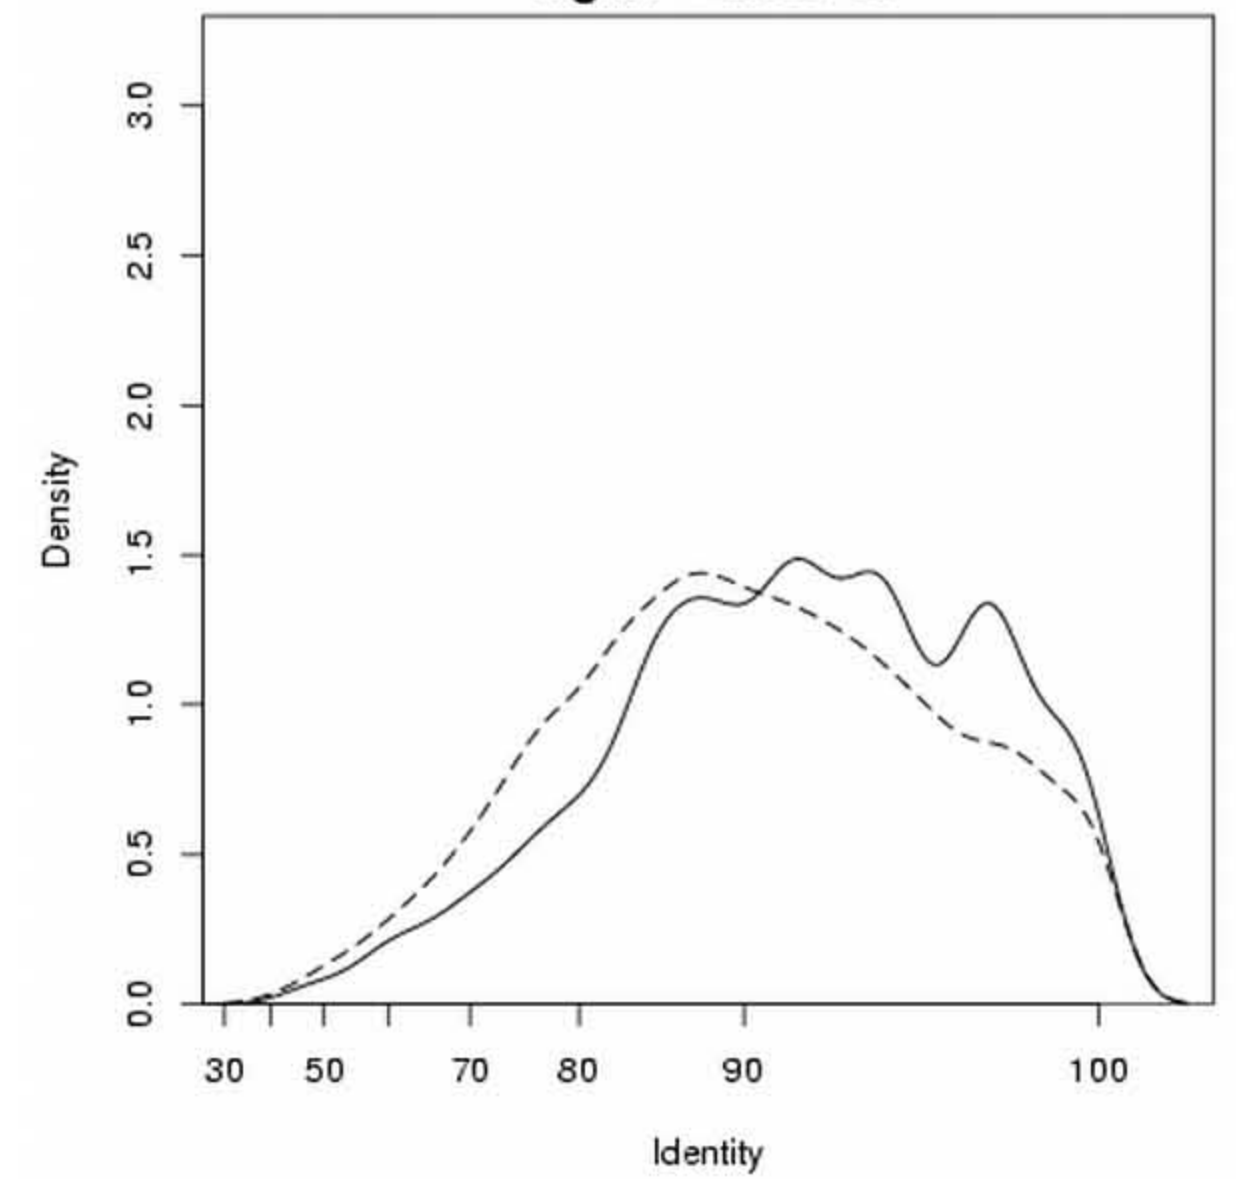

**ATP binding**  
N = 520  
High: P = 2.85e-08

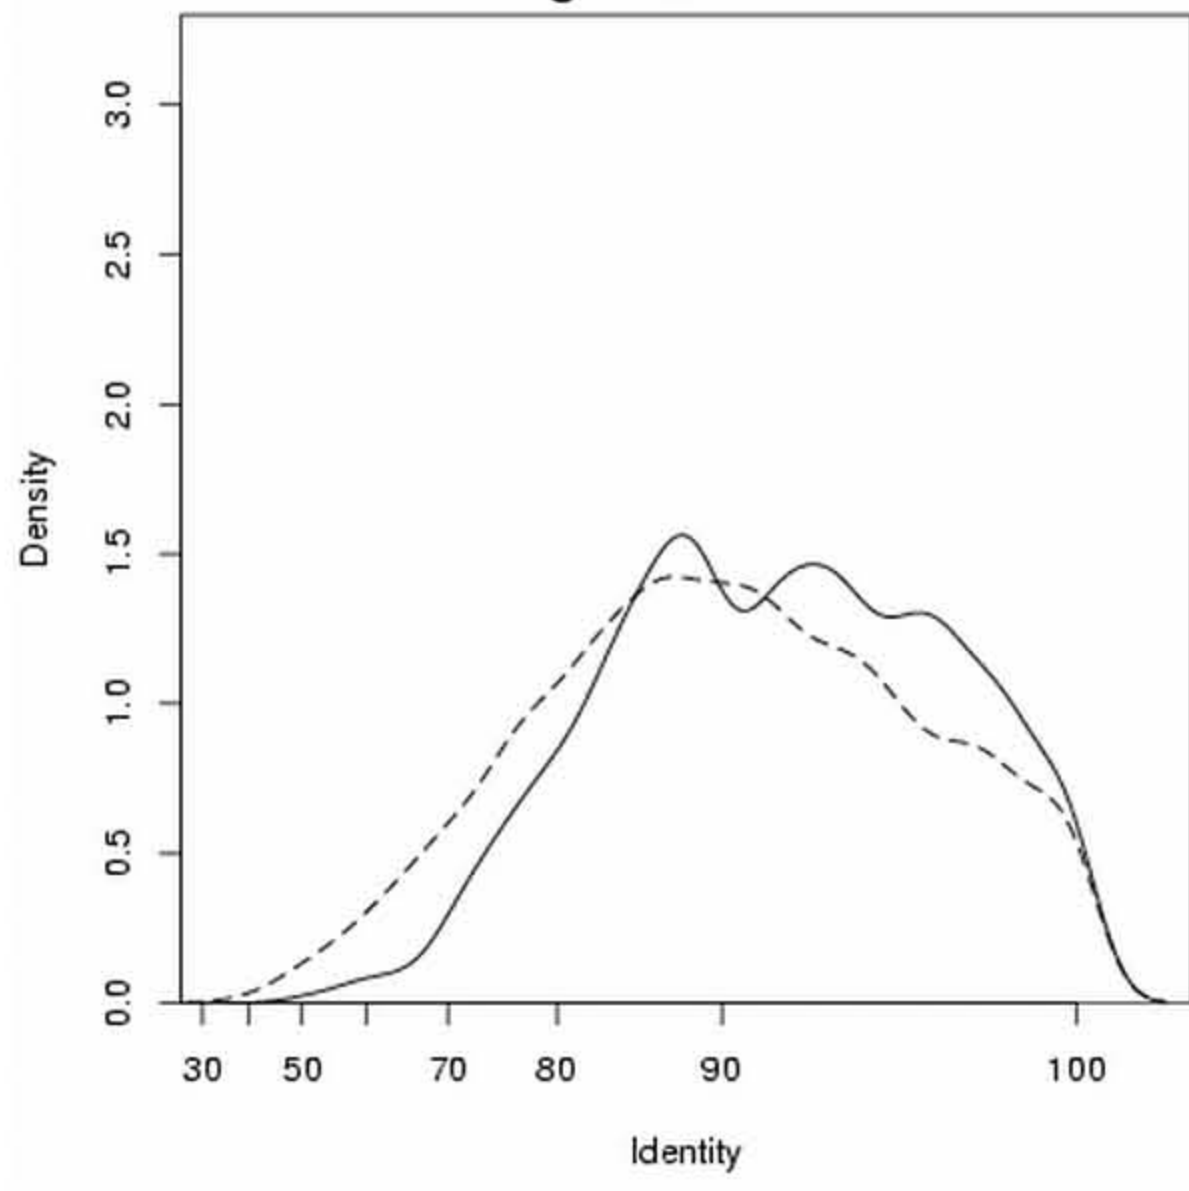

**actin cytoskeleton**  
N = 85  
High: P = 5.37e-08

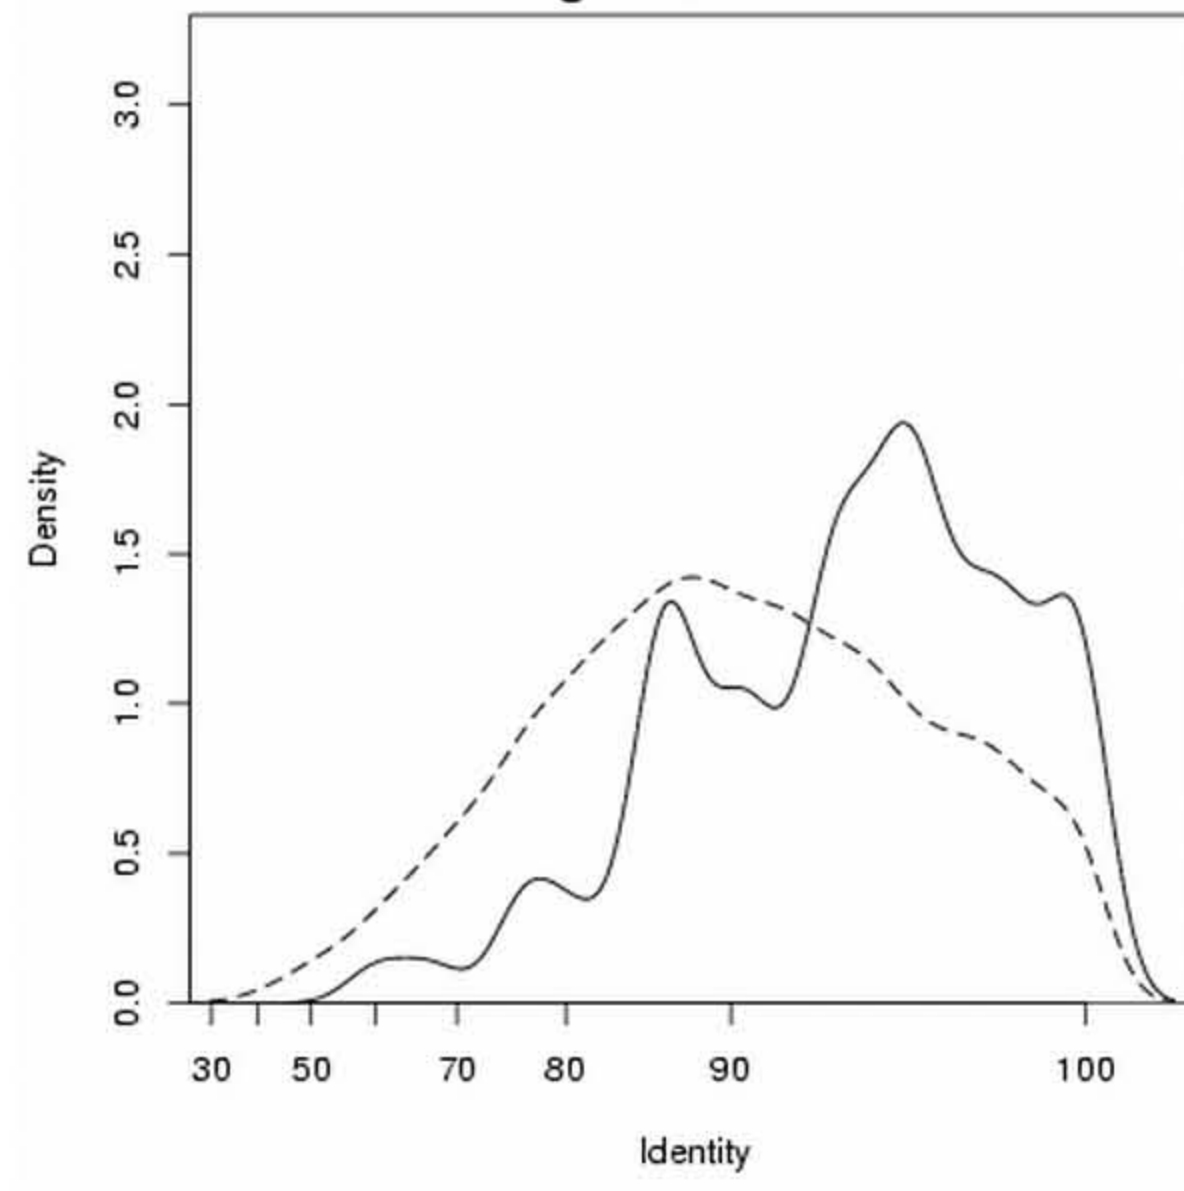

**vesicle-mediated transport**  
N = 190  
High: P = 7.02e-08

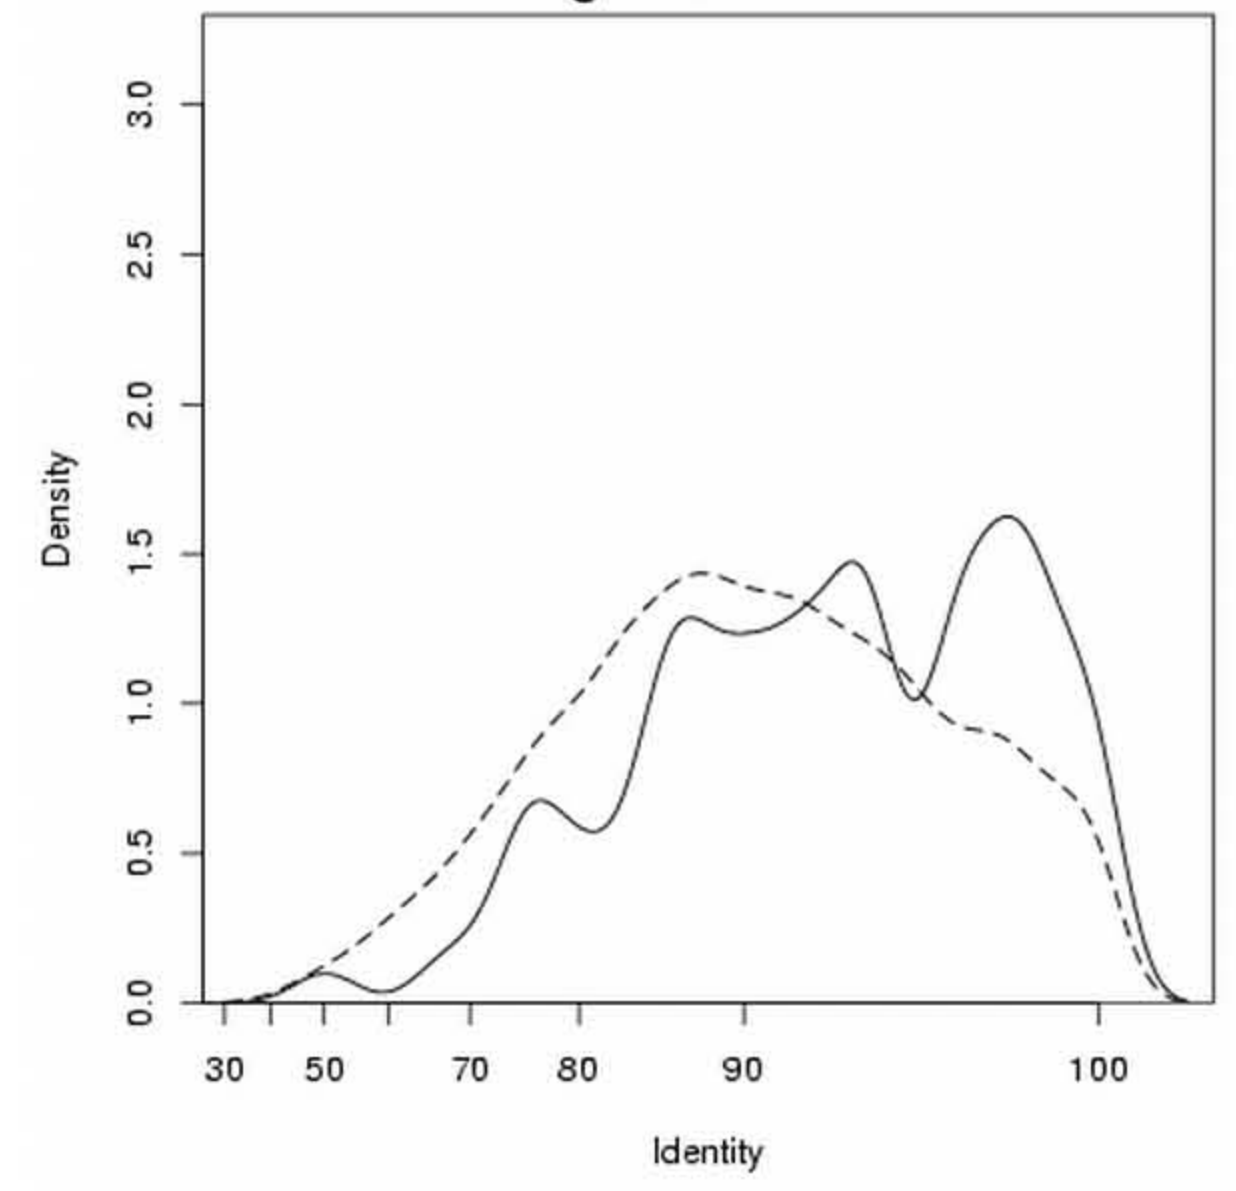

**cytoskeleton organization and biogenesis**  
N = 155  
High: P = 9.26e-08

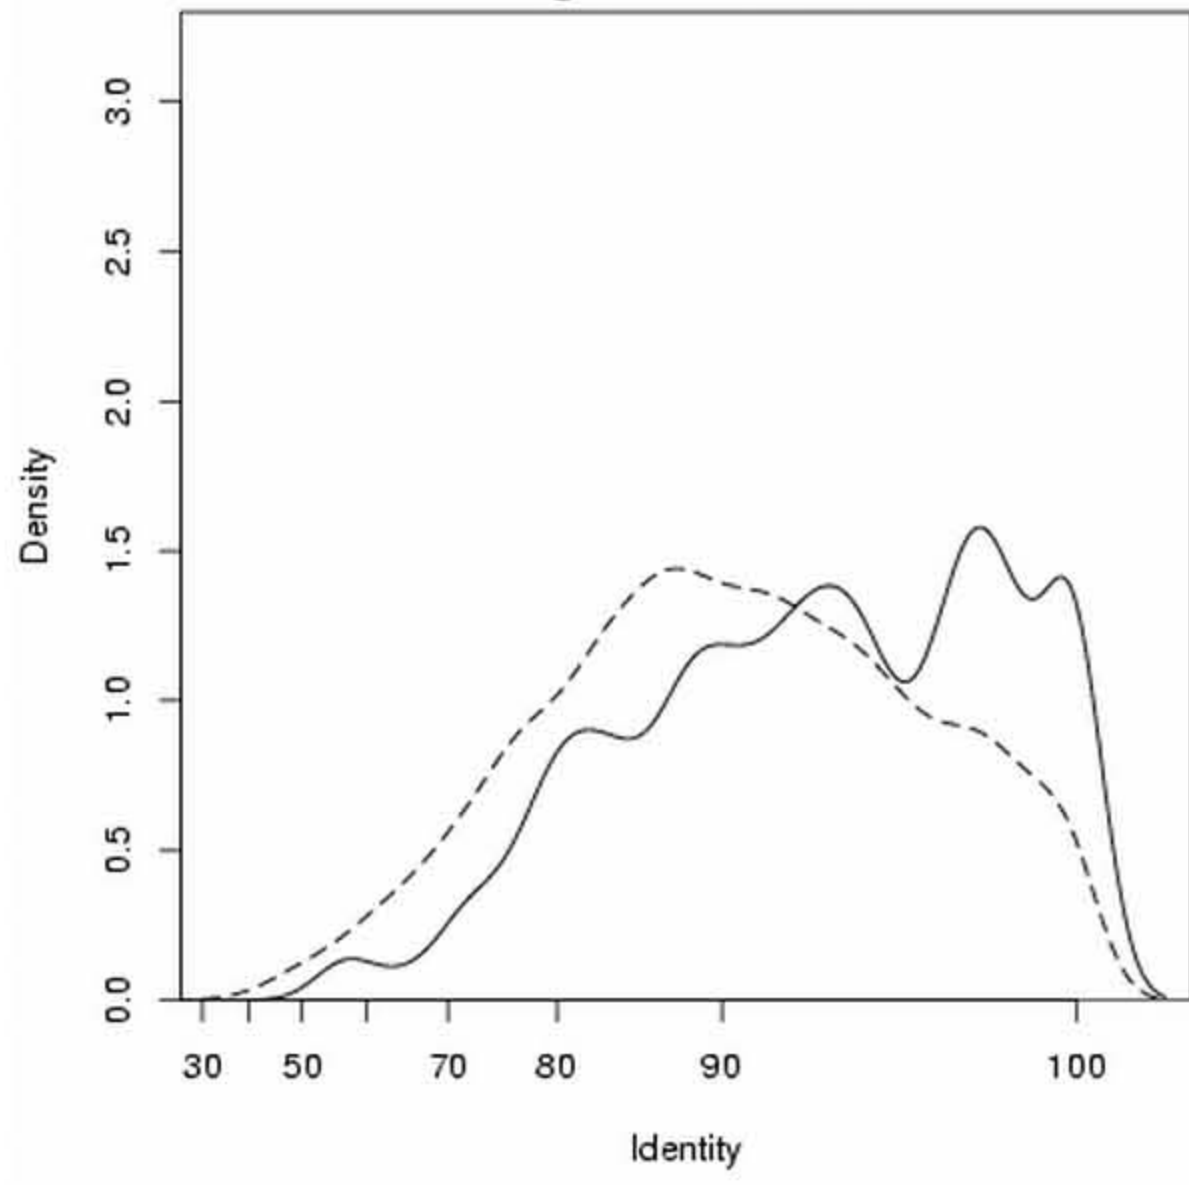

**cytoskeletal protein binding**  
N = 137  
High: P = 1.44e-07

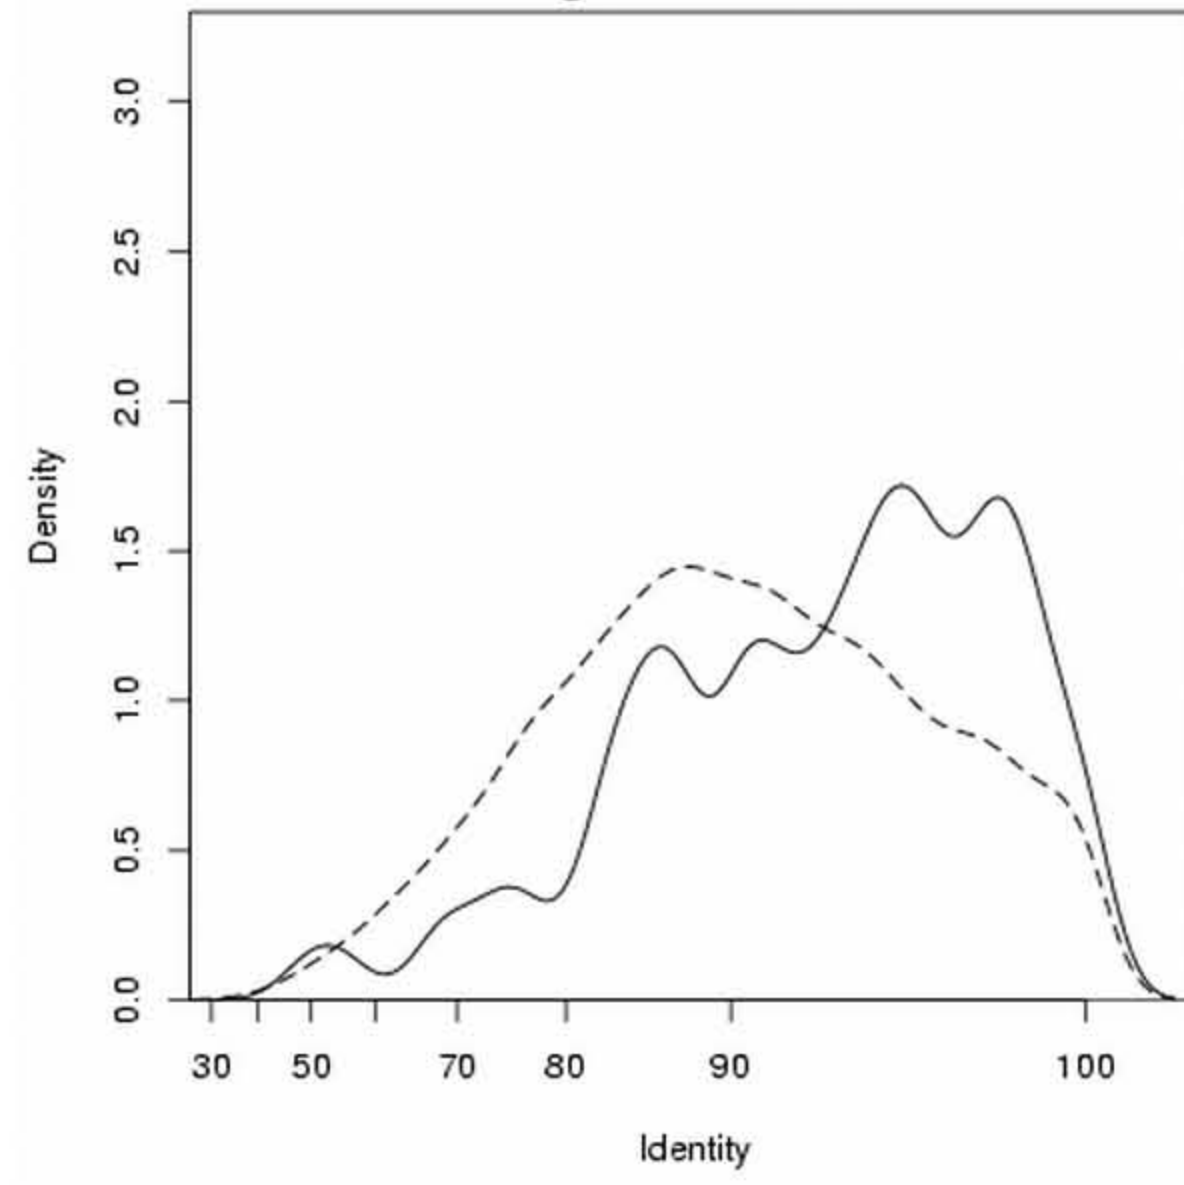

**transcription regulator activity**  
N = 414  
High: P = 6.06e-07

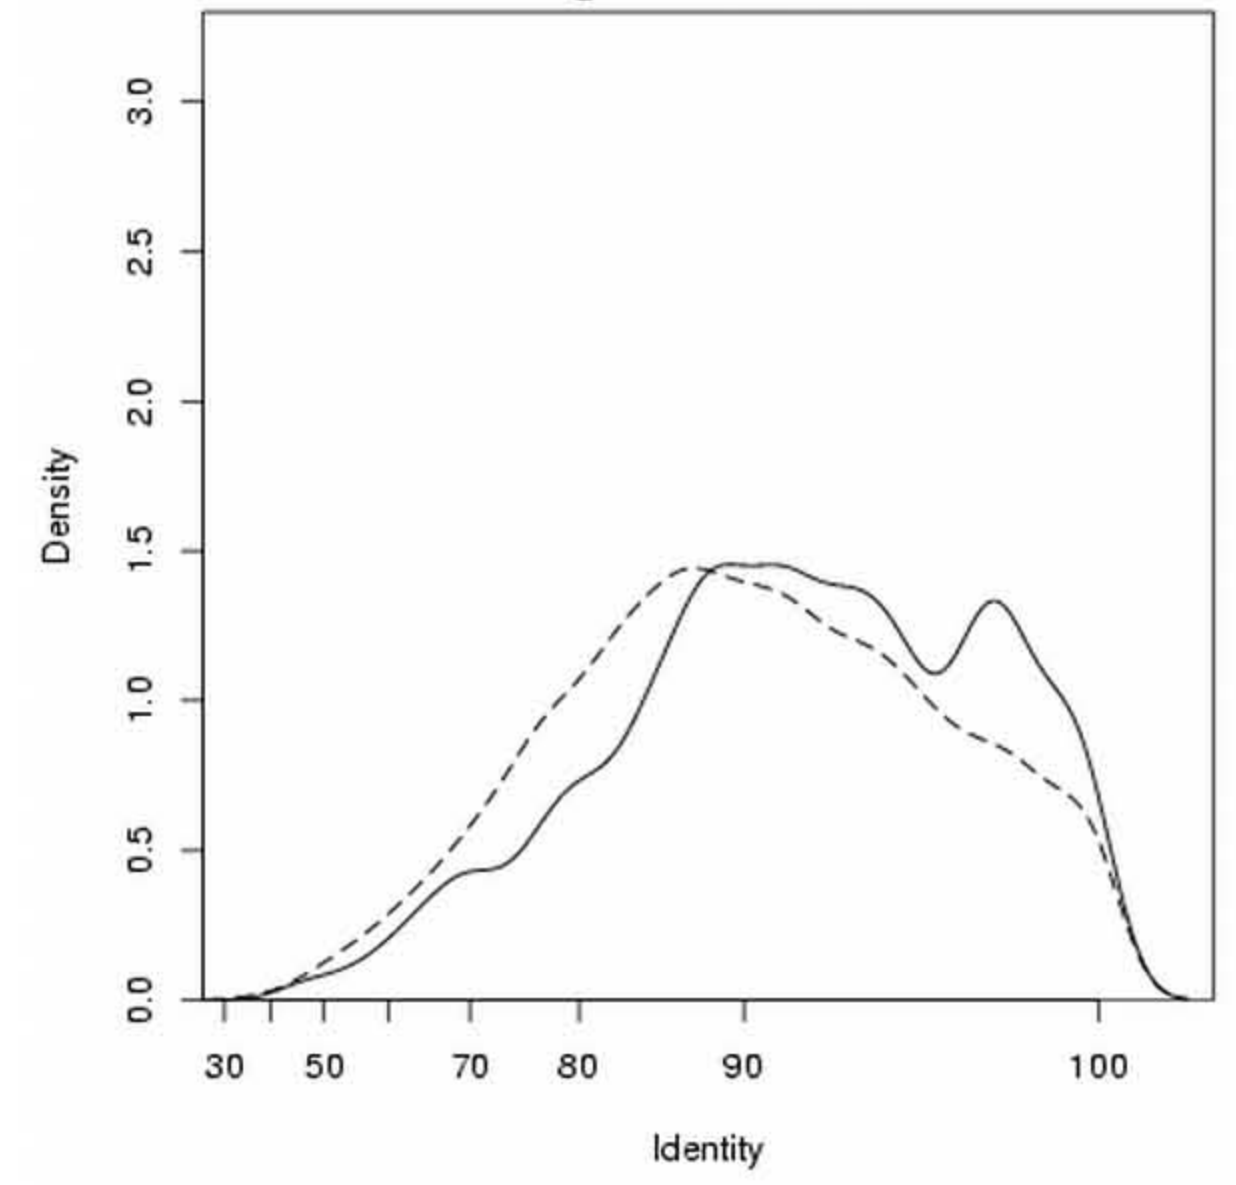

**secretory pathway**  
N = 102  
High: P = 7.91e-07

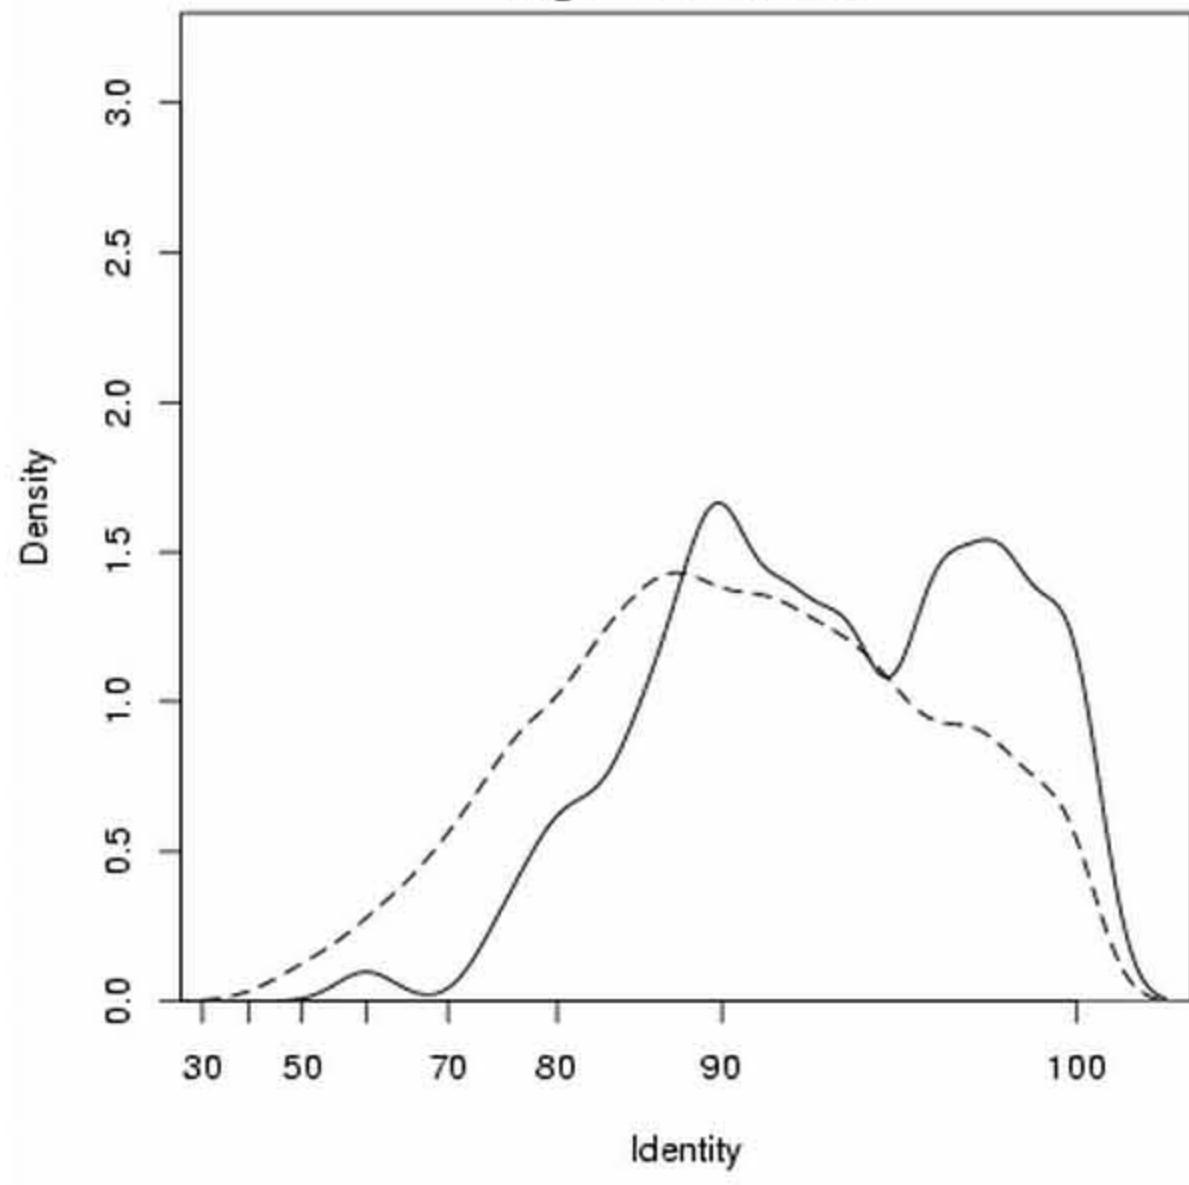

**nucleoplasm**  
N = 107  
High: P = 1.22e-06

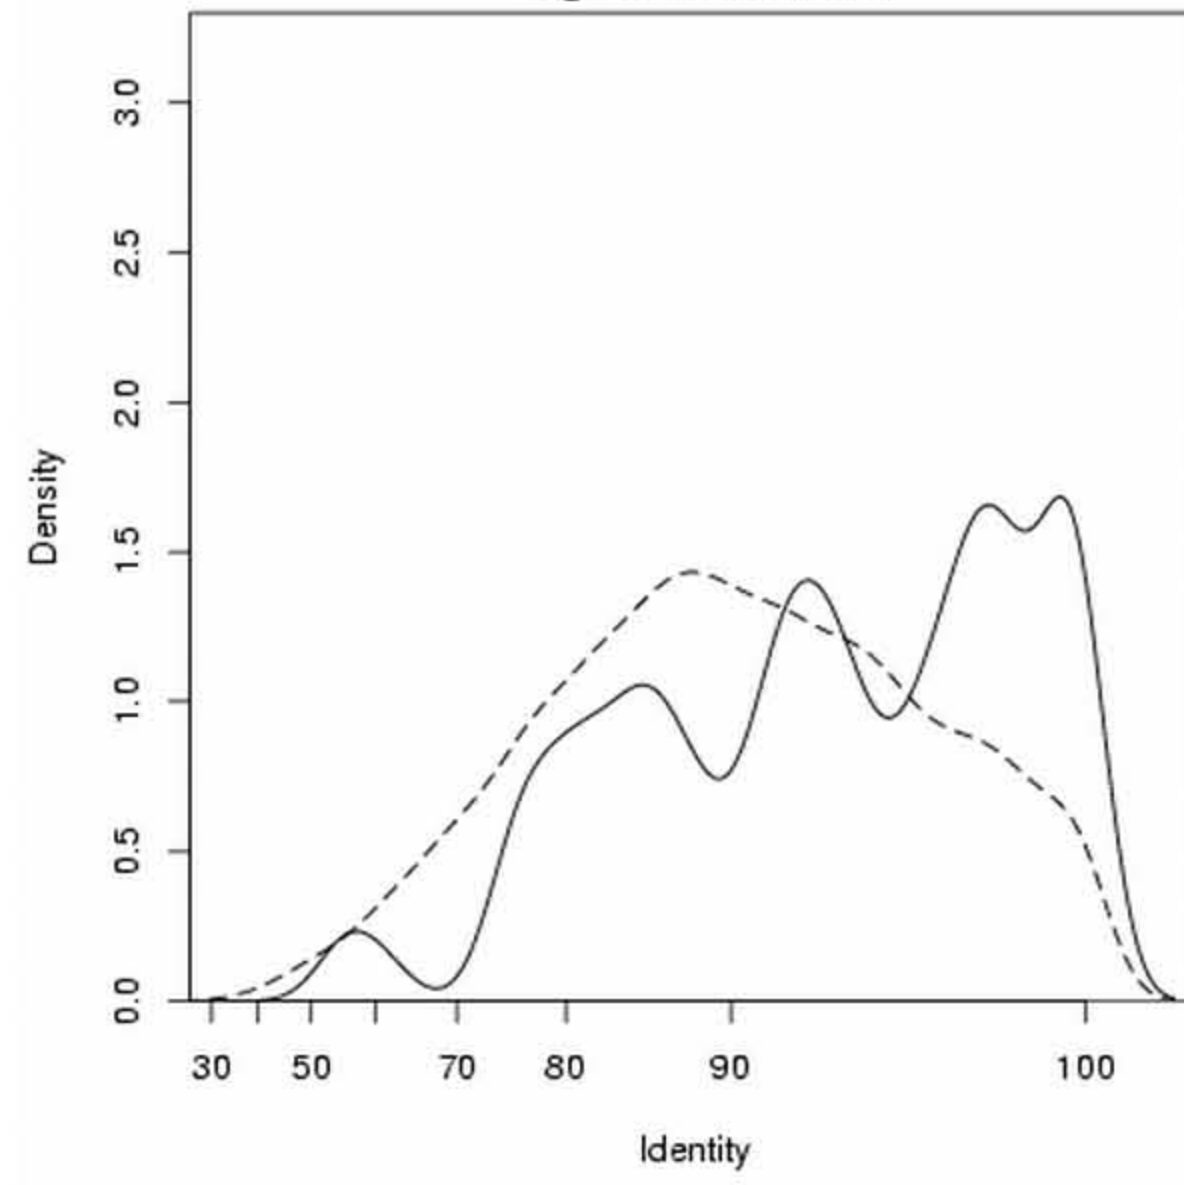

**ribosome**  
N = 114  
High: P = 1.36e-06

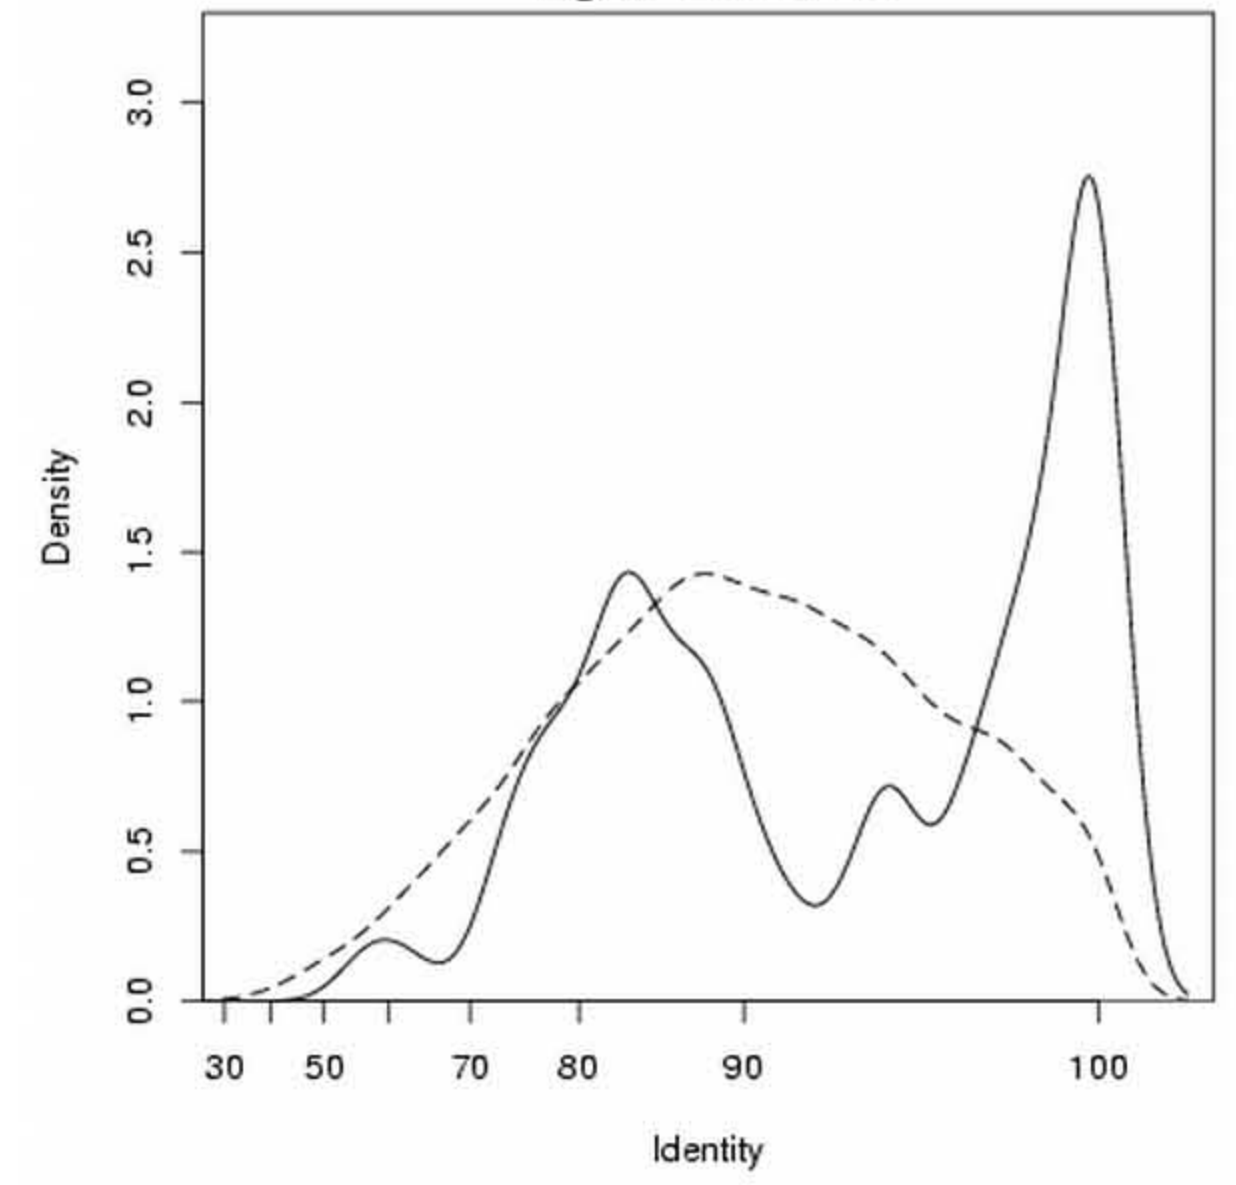

**protein biosynthesis**  
N = 283  
High: P = 1.56e-06

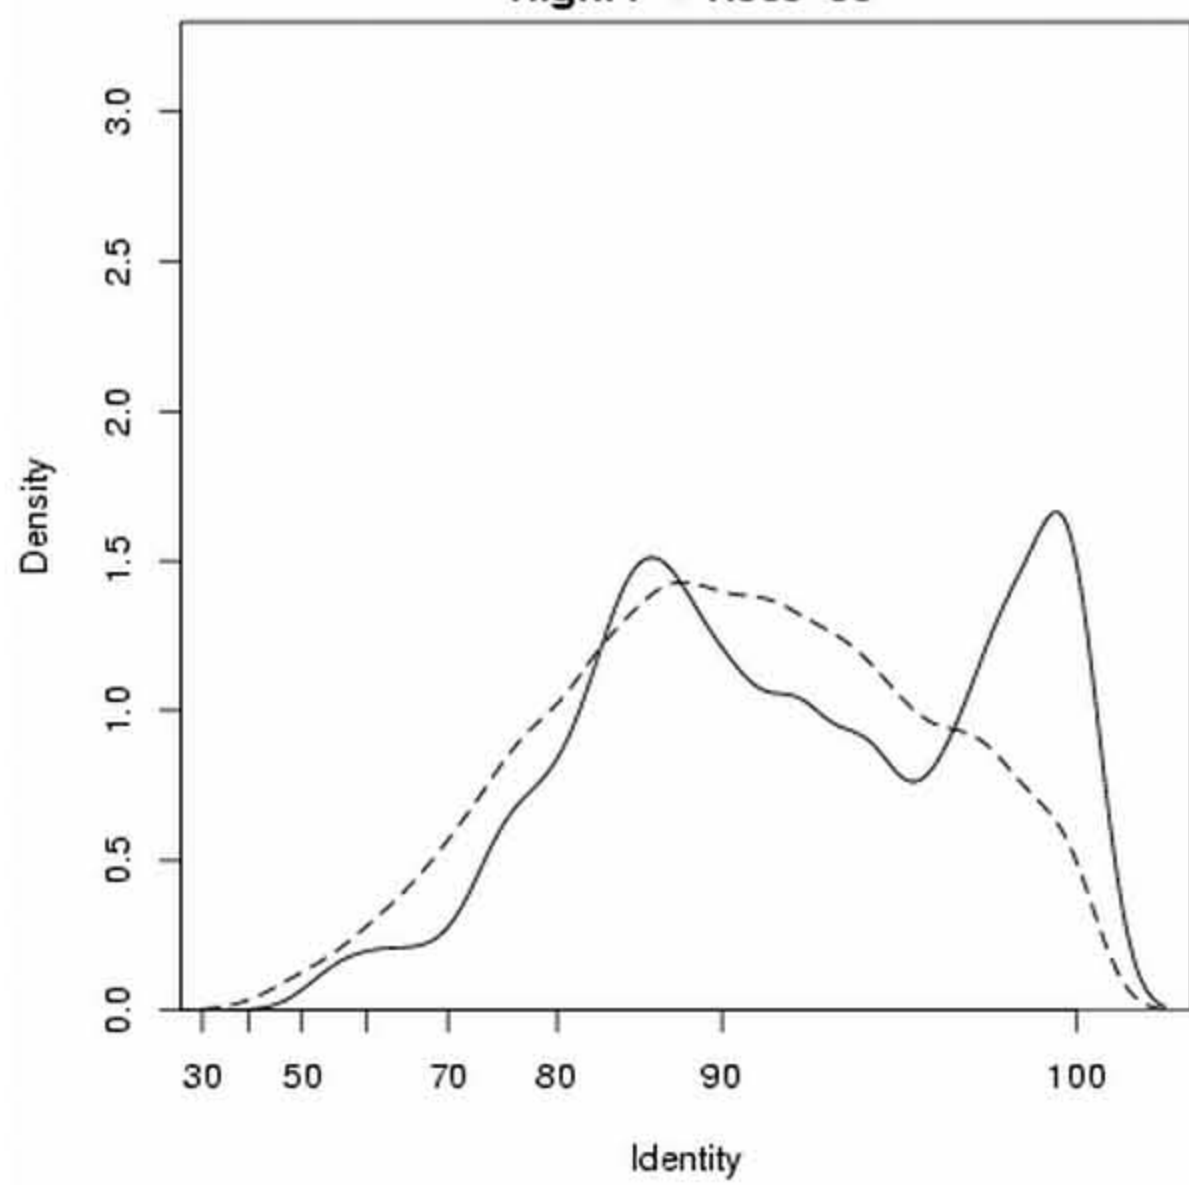

**ubiquitin cycle**  
N = 235  
High: P = 2.86e-06

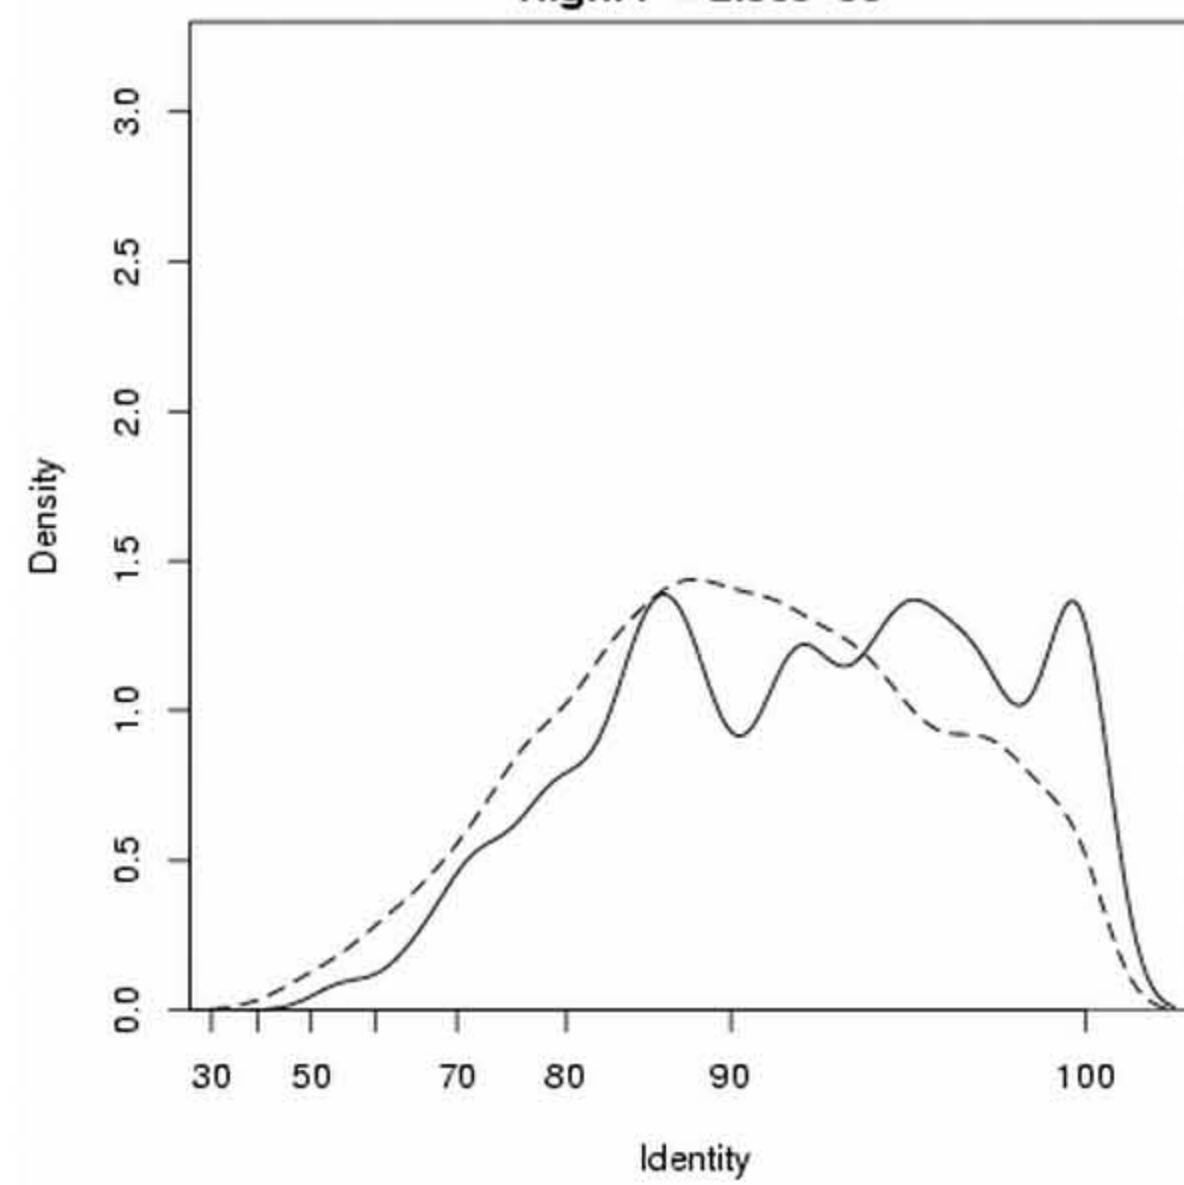

**ion channel activity**  
N = 98  
High: P = 7.08e-05

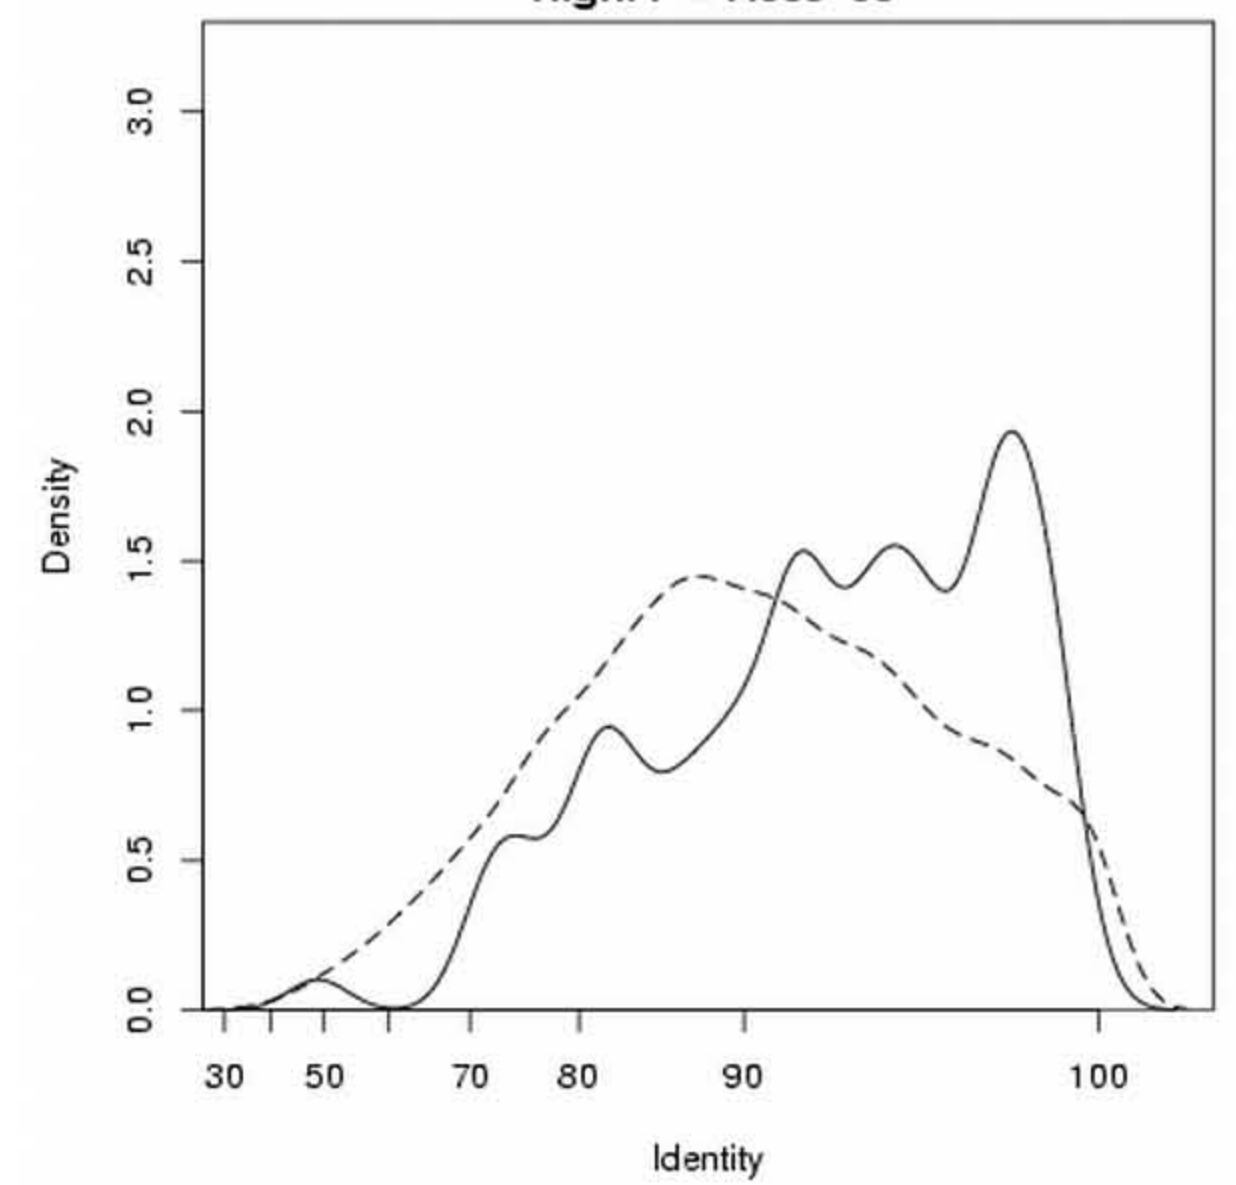

**protein amino acid phosphorylation**  
N = 213  
High: P = 0.000101

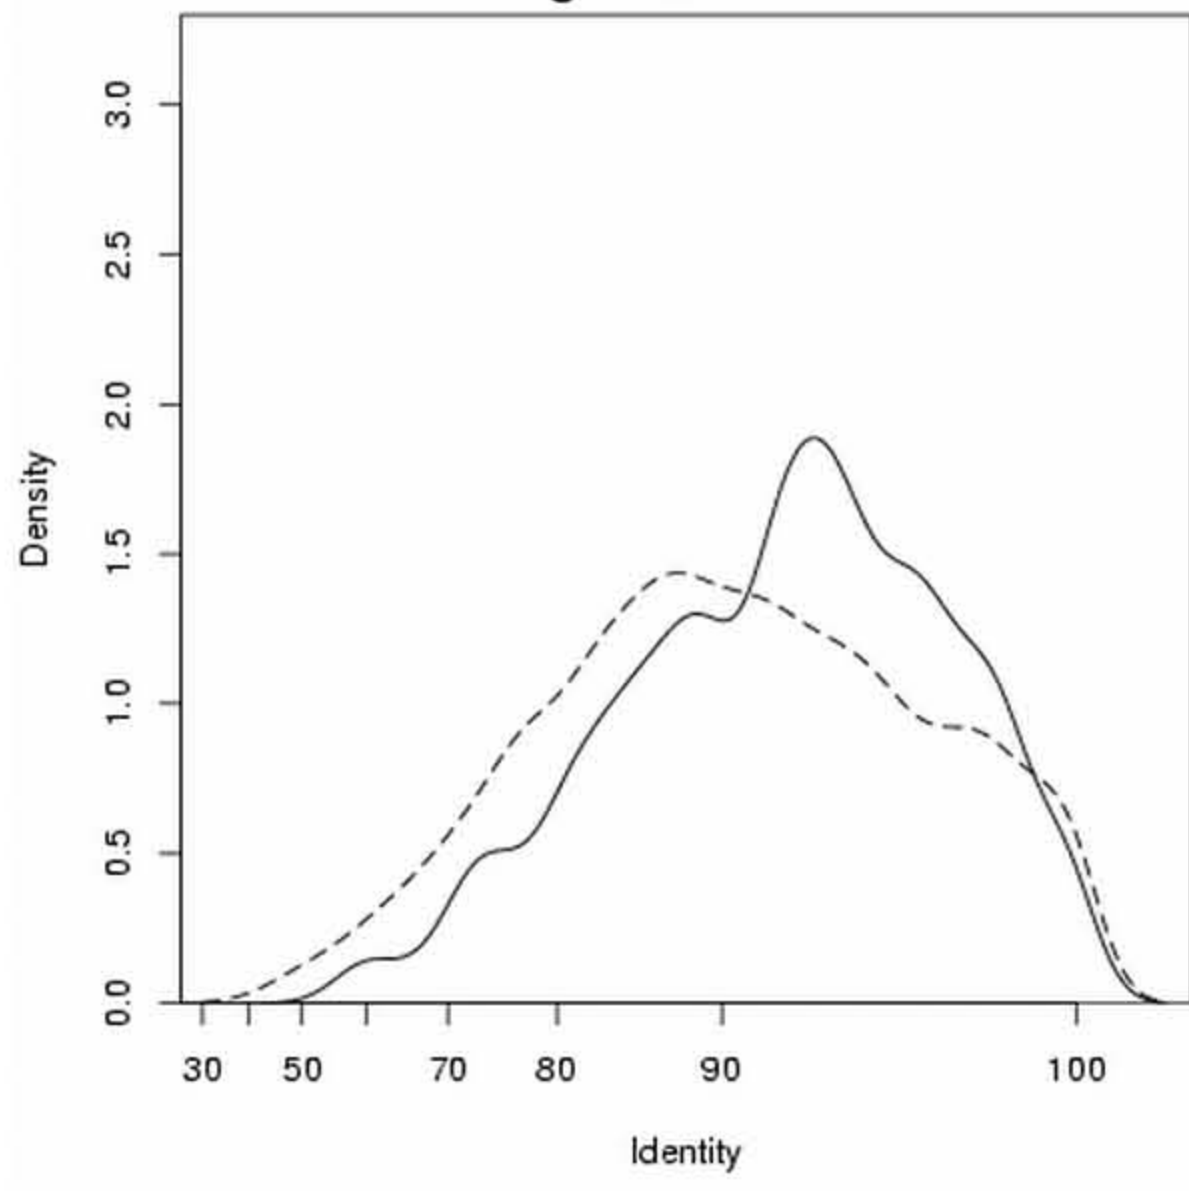

**ATPase activity**  
N = 130  
High: P = 0.000143

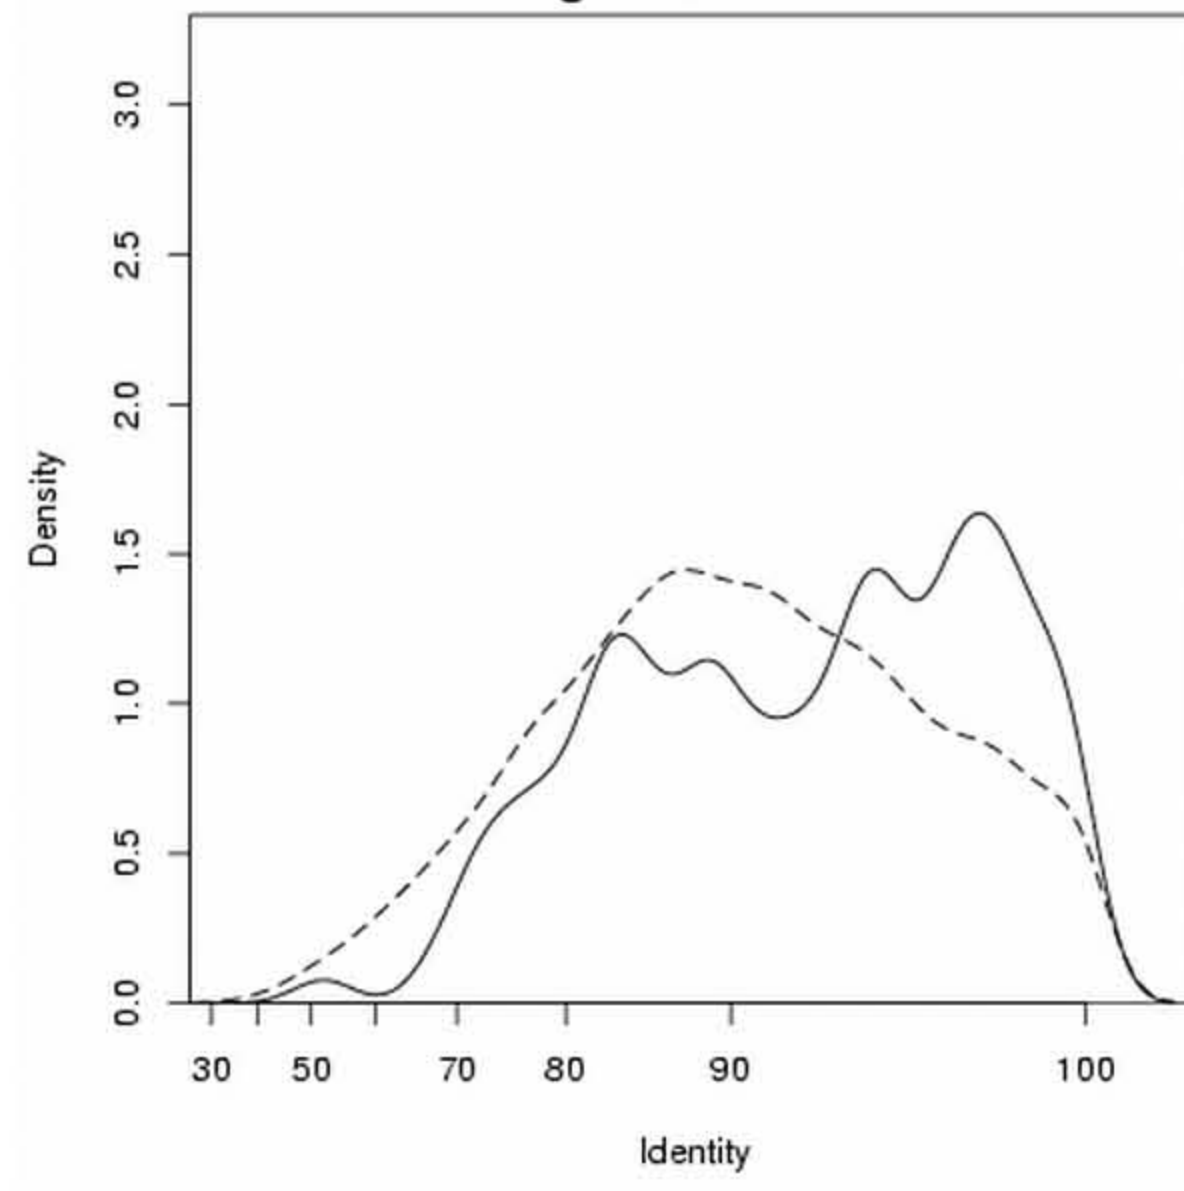

**endomembrane system**  
N = 163  
High: P = 0.000154

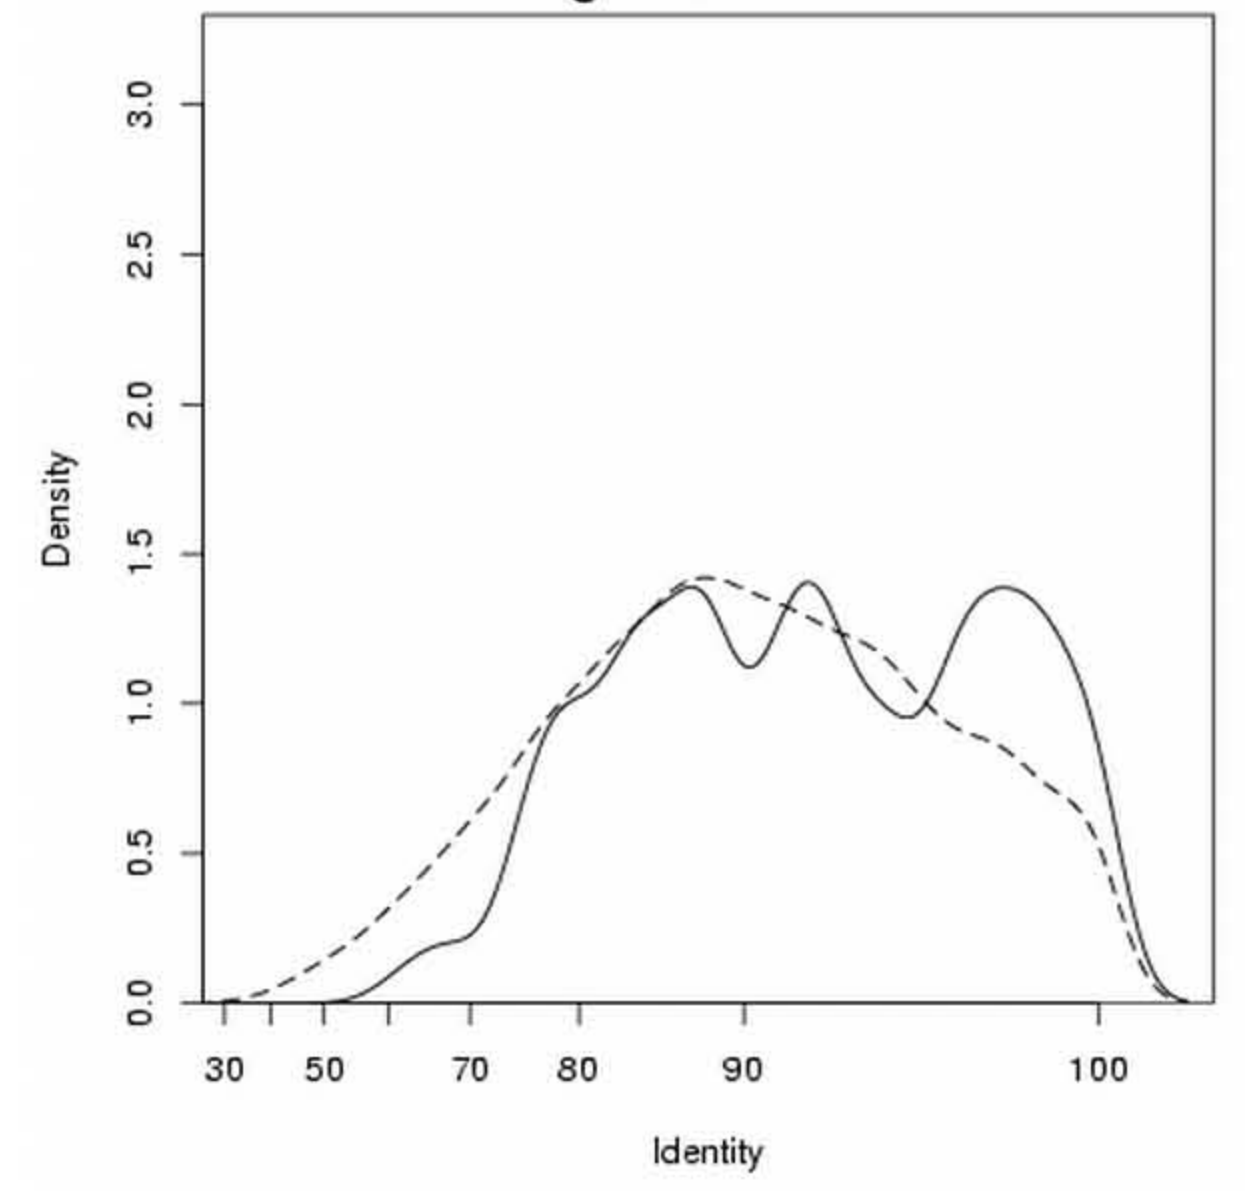

**protein kinase activity**  
N = 220  
High: P = 0.000178

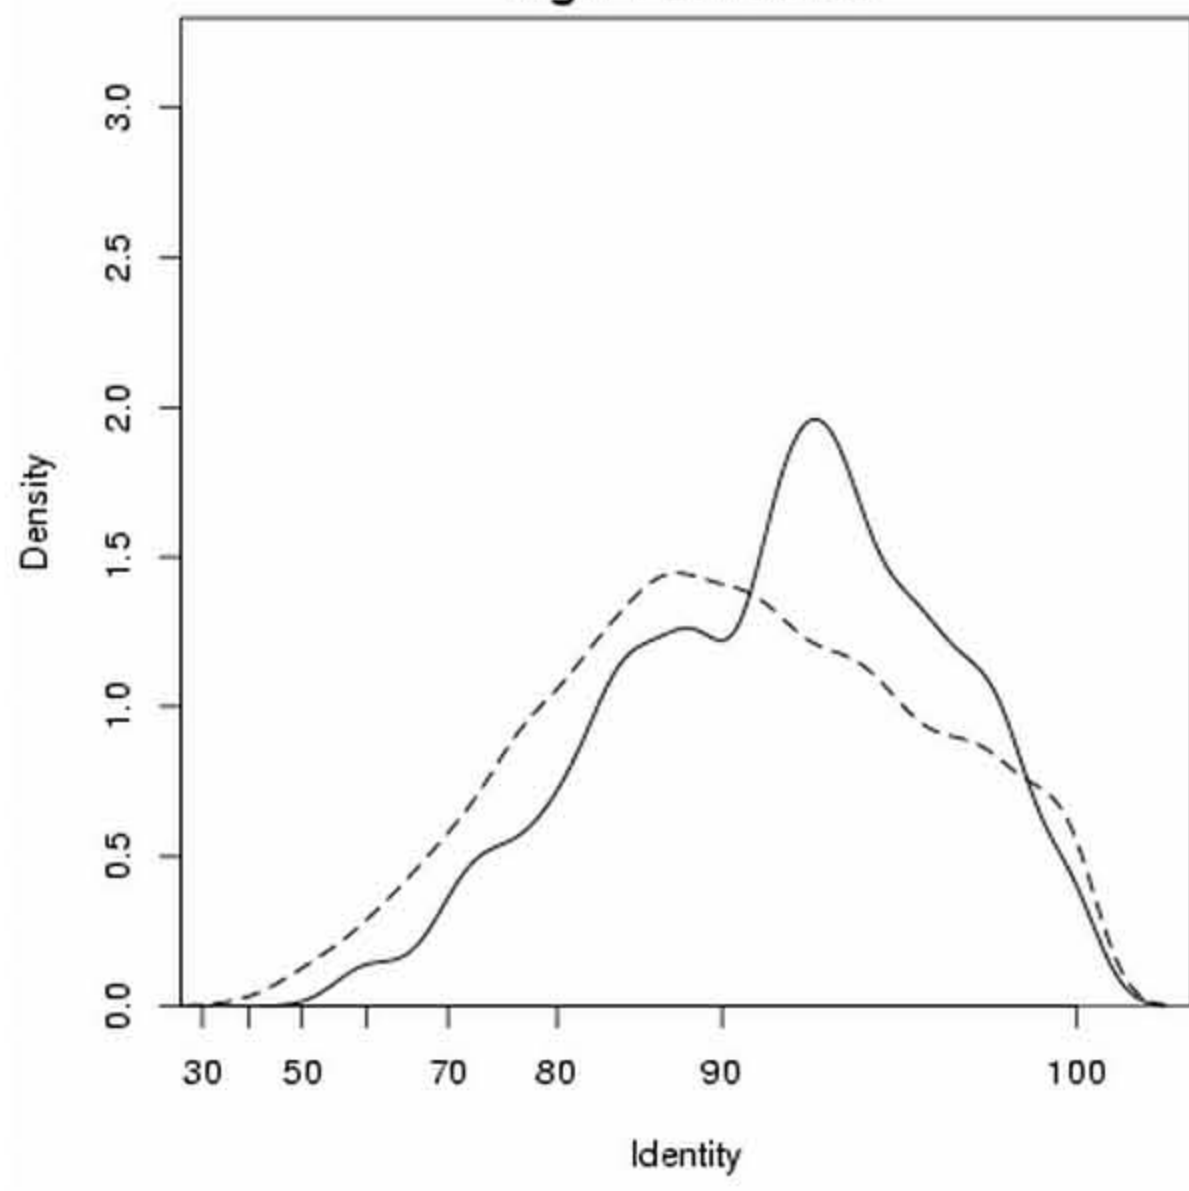

**nervous system development**  
N = 154  
High: P = 0.000293

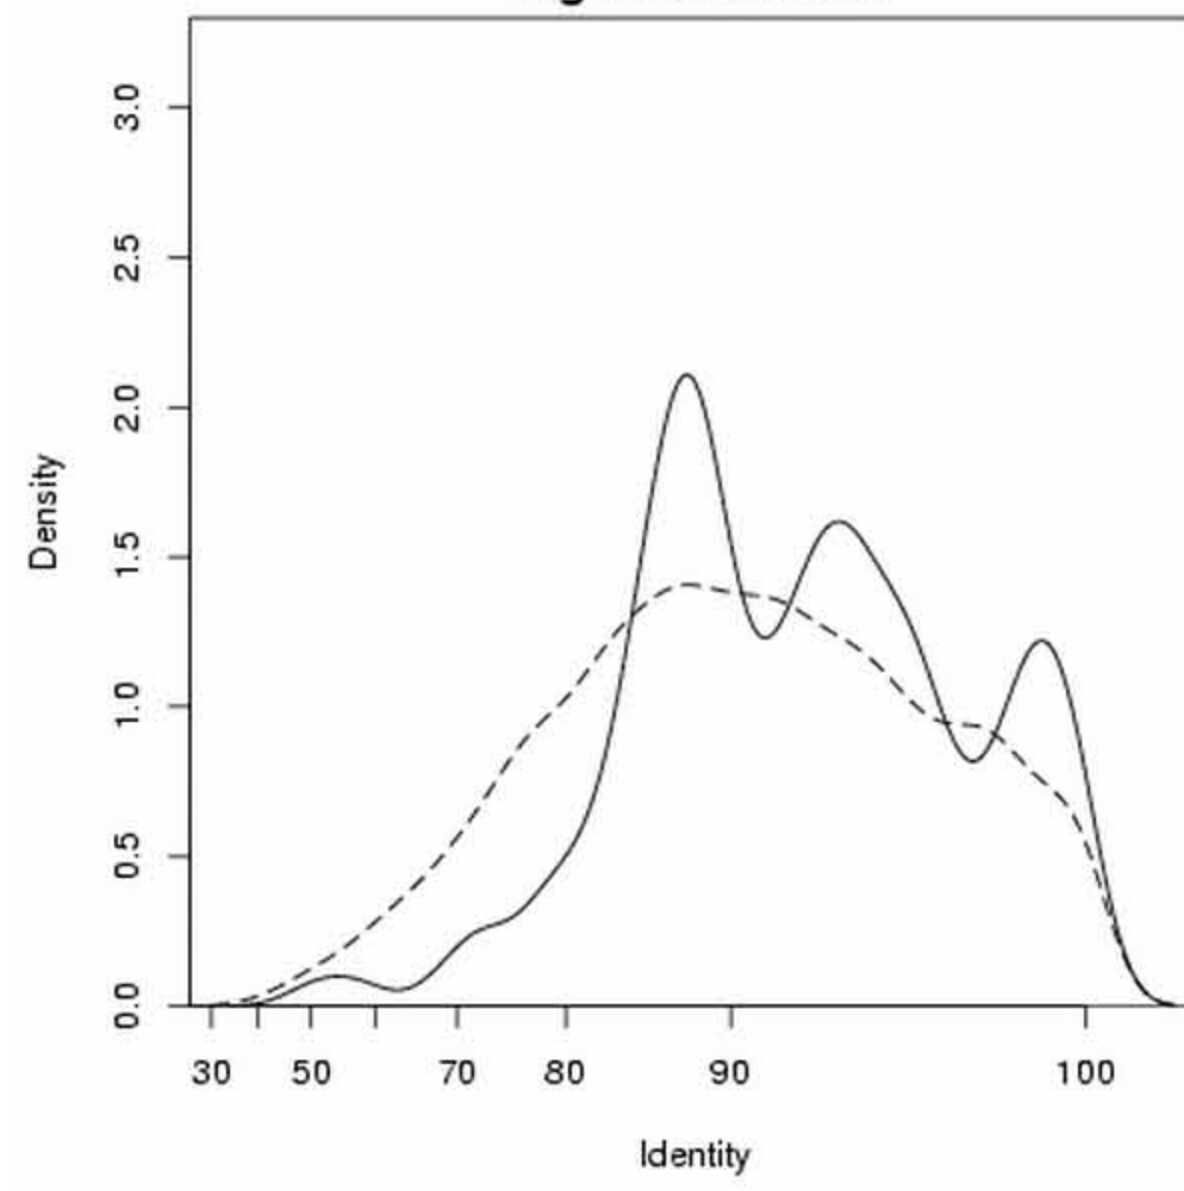

**microtubule cytoskeleton**  
N = 115  
High: P = 0.000595

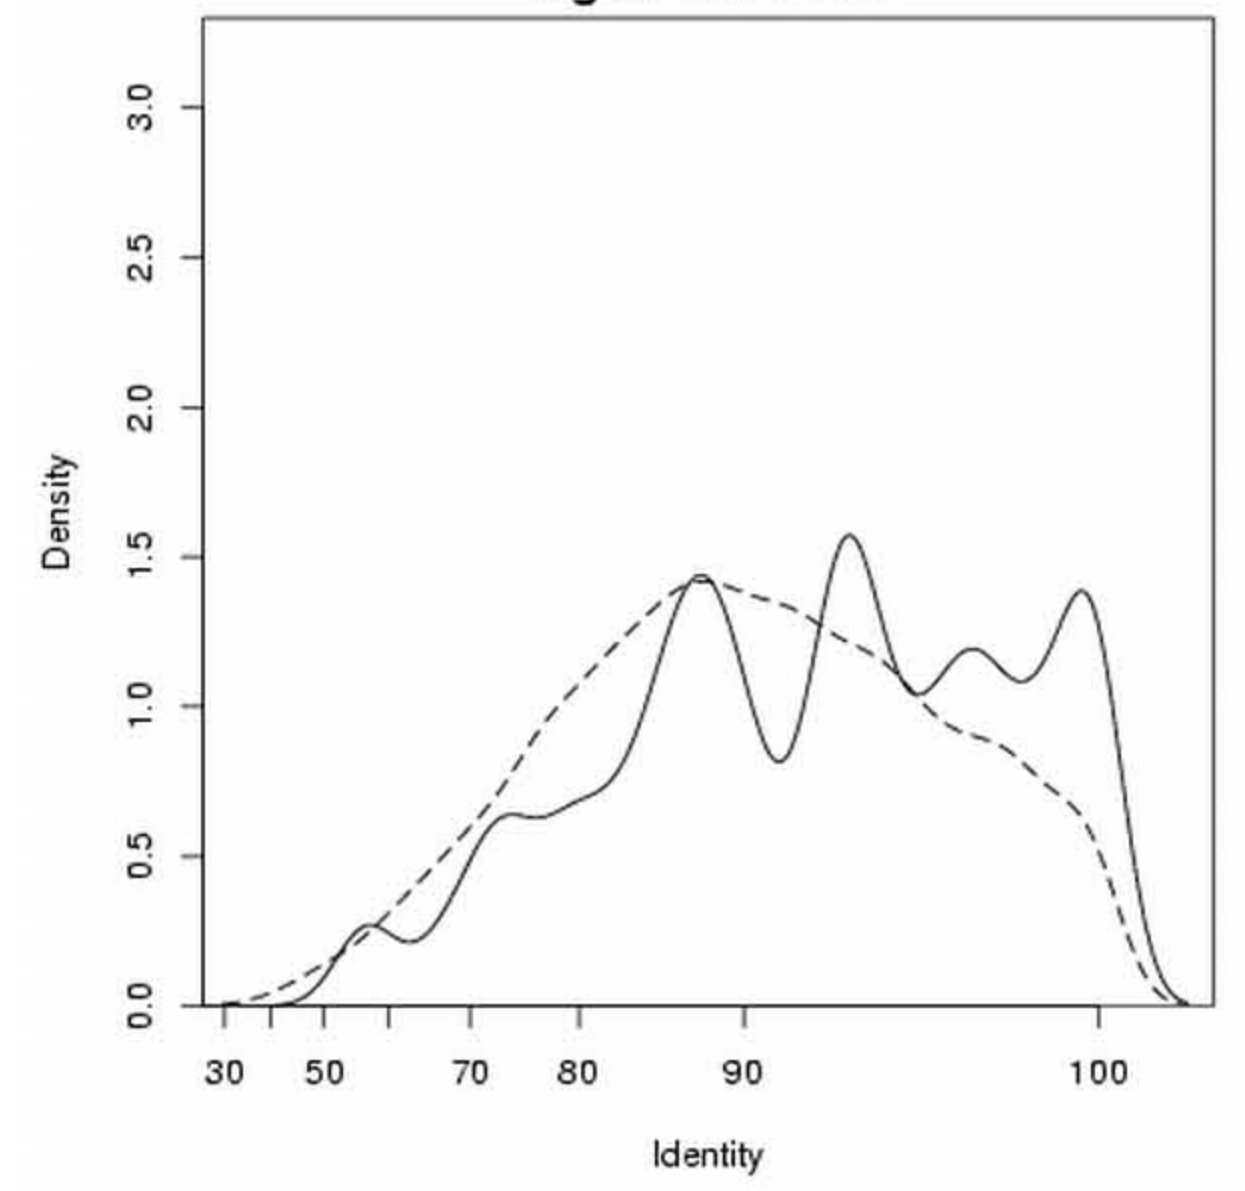

**vesicle**  
N = 86  
High: P = 0.000732

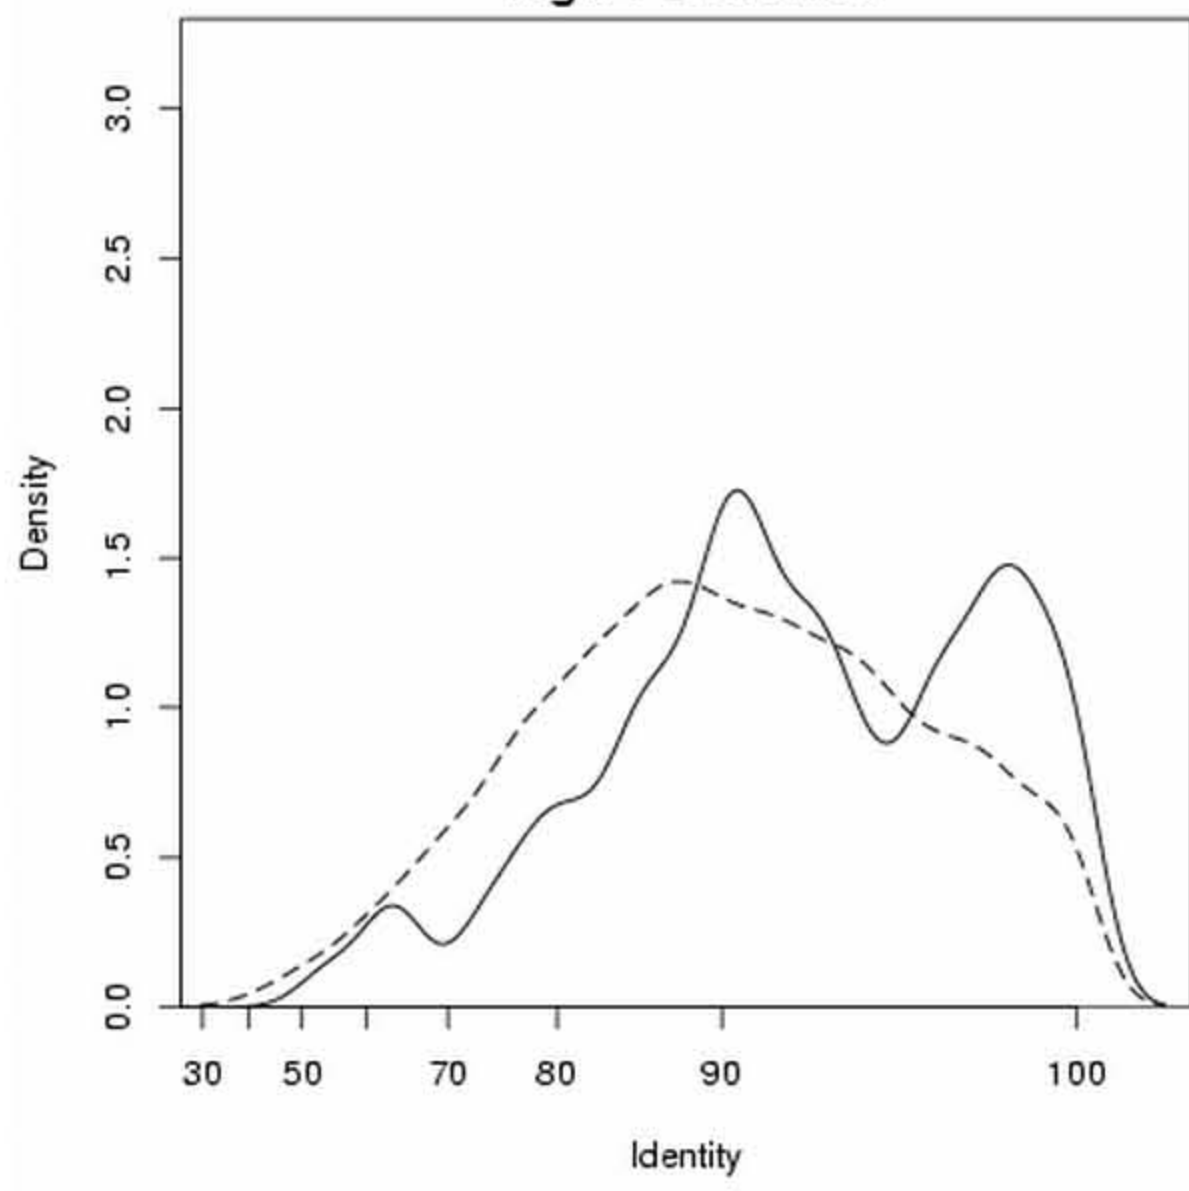

**structural molecule activity**  
N = 307  
High: P = 0.000801

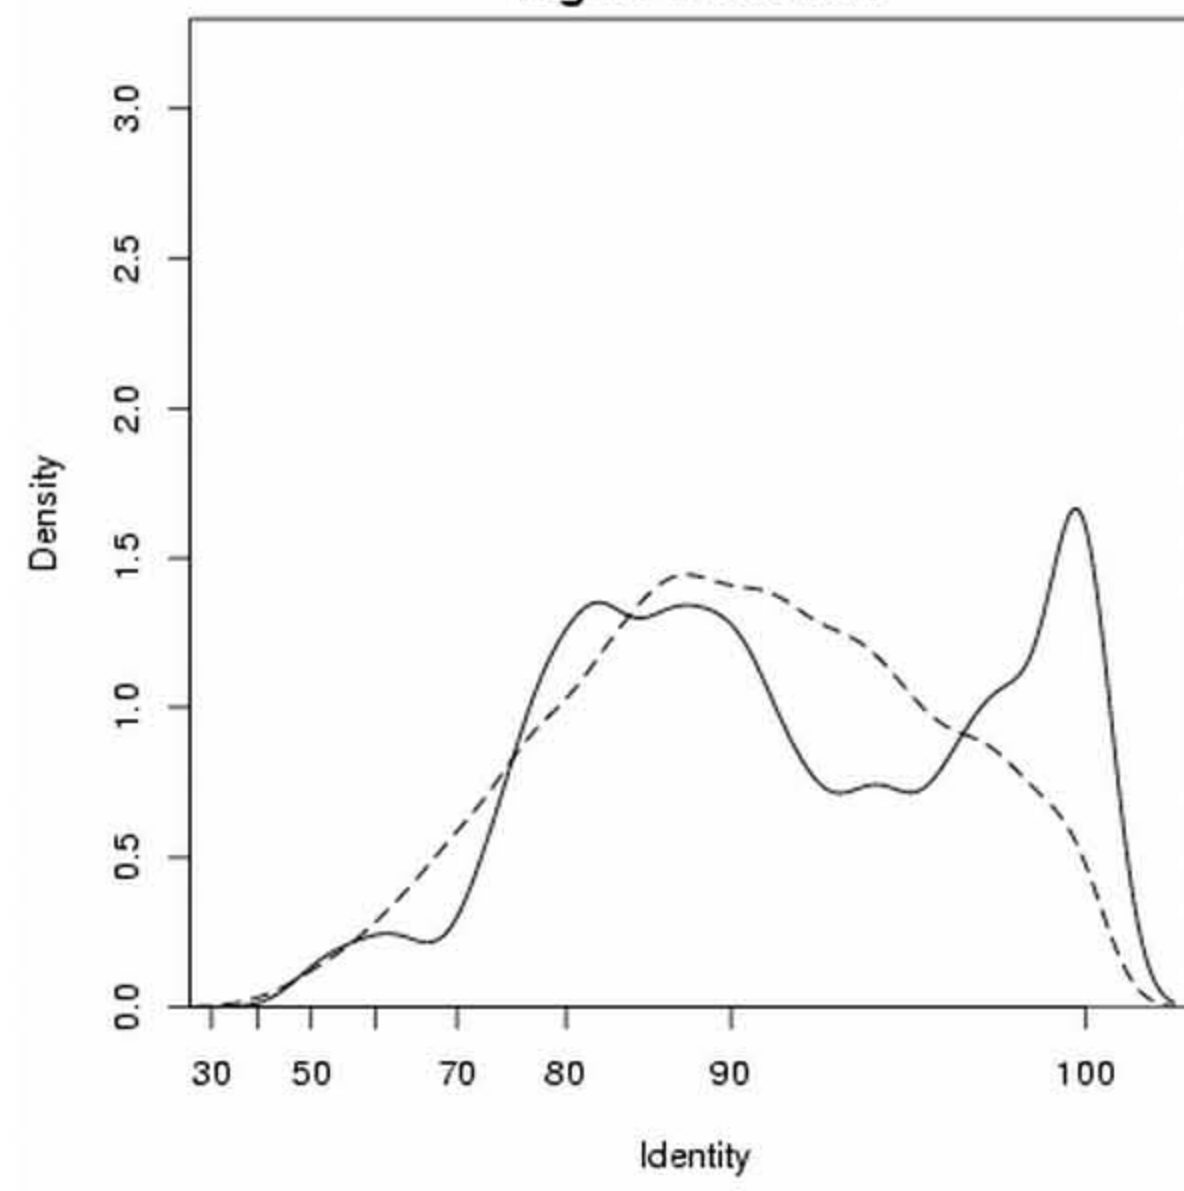

**structural constituent of ribosome**  
N = 130  
High: P = 0.000843

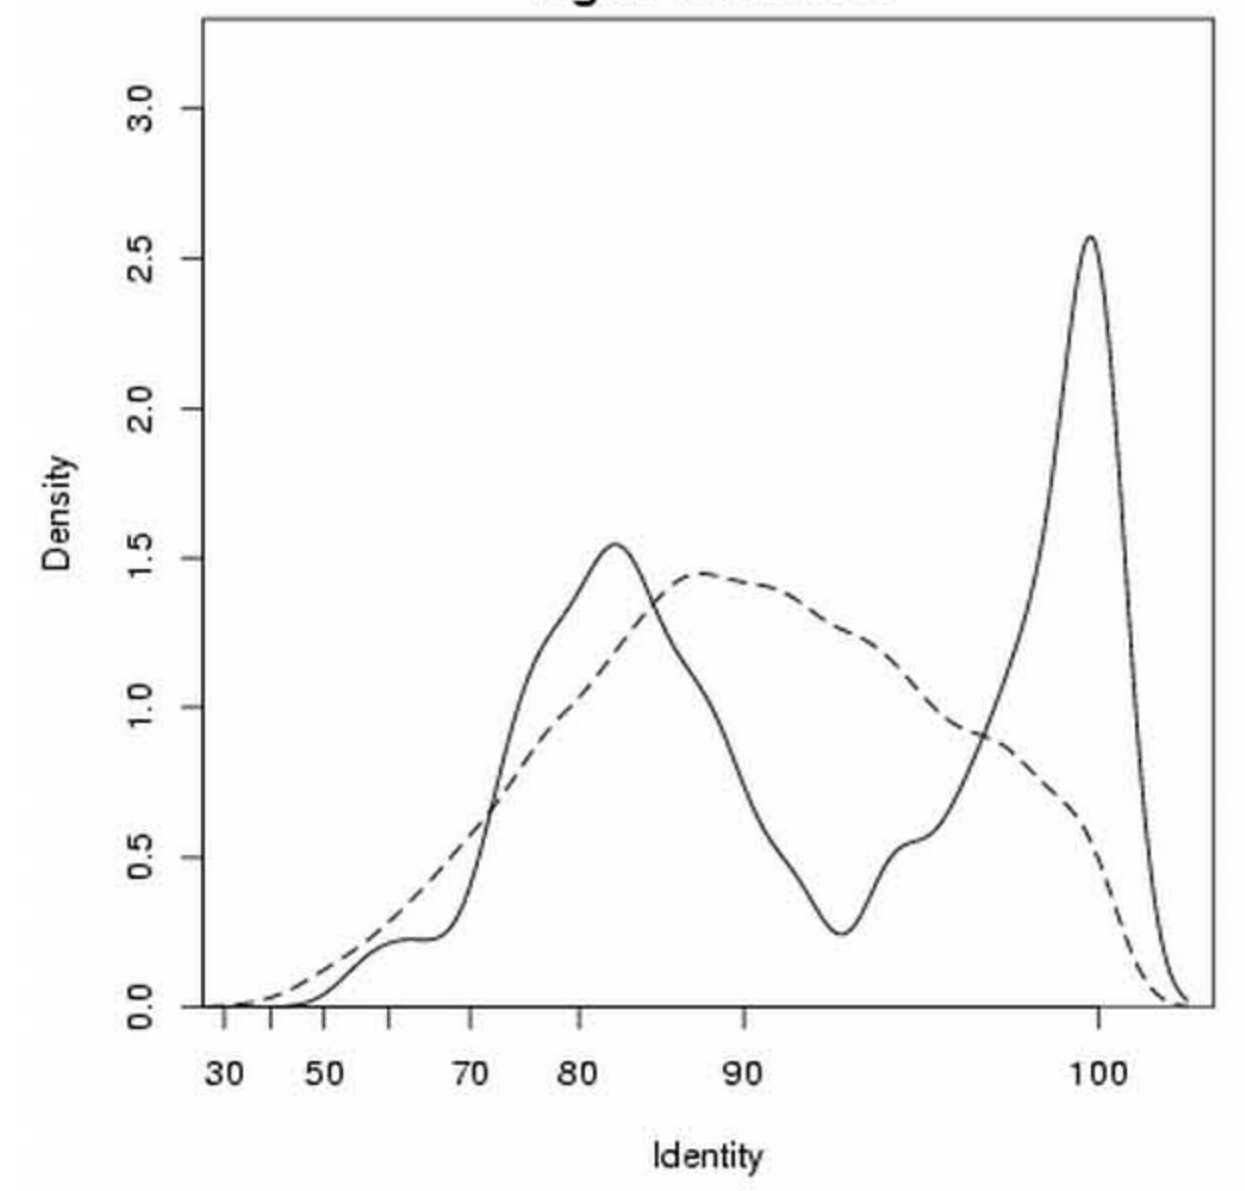

**ubiquitin-protein ligase activity**  
N = 144  
High: P = 0.00197

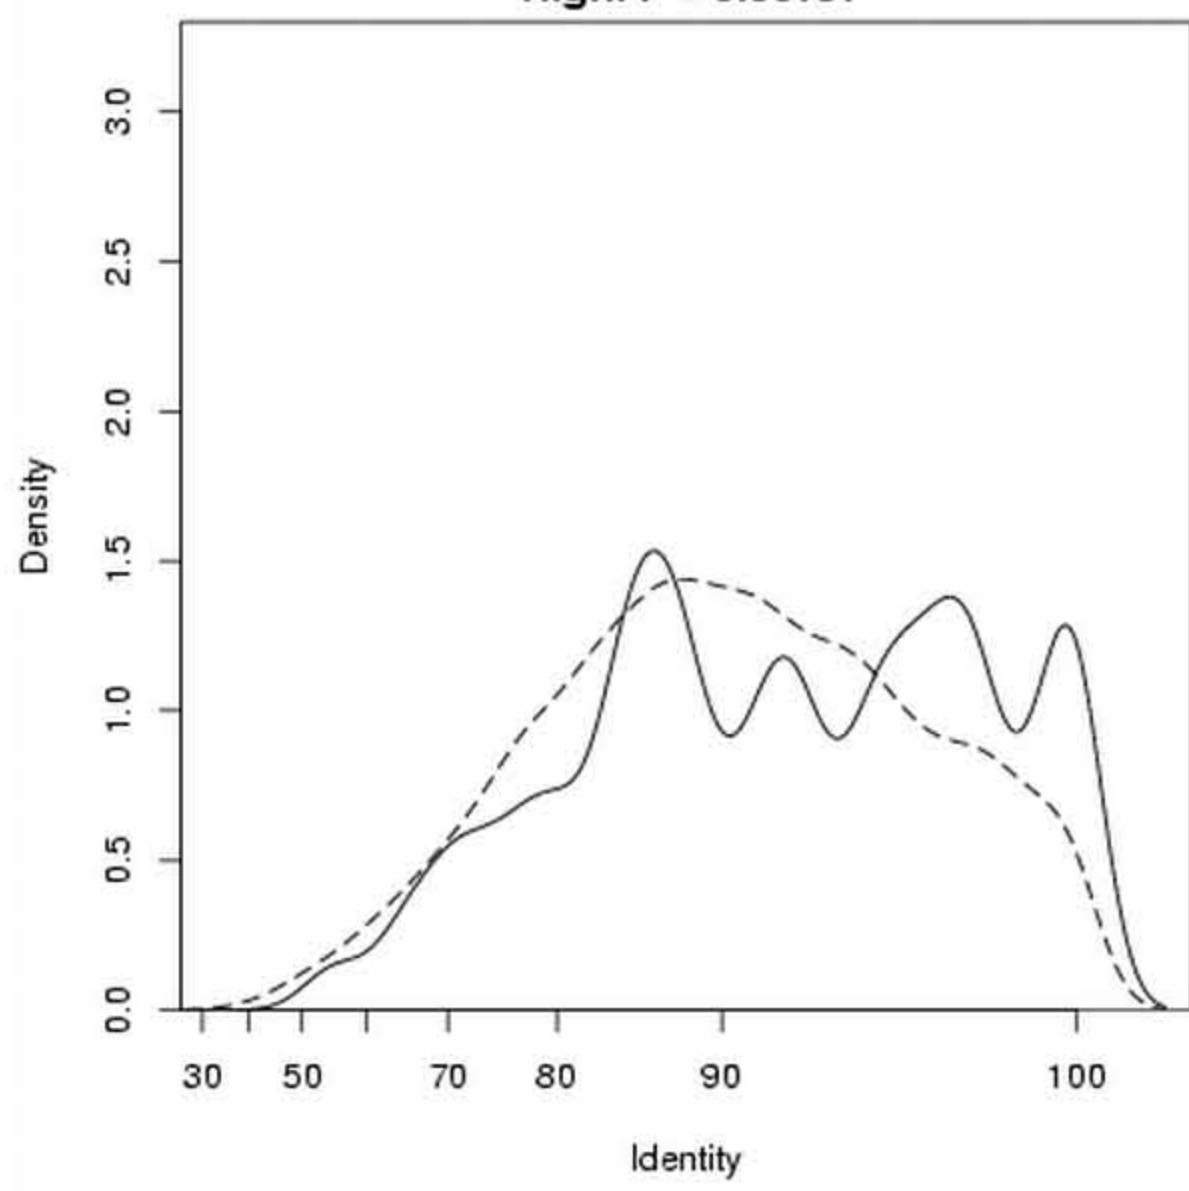

**organelle membrane**  
N = 242  
High: P = 0.00412

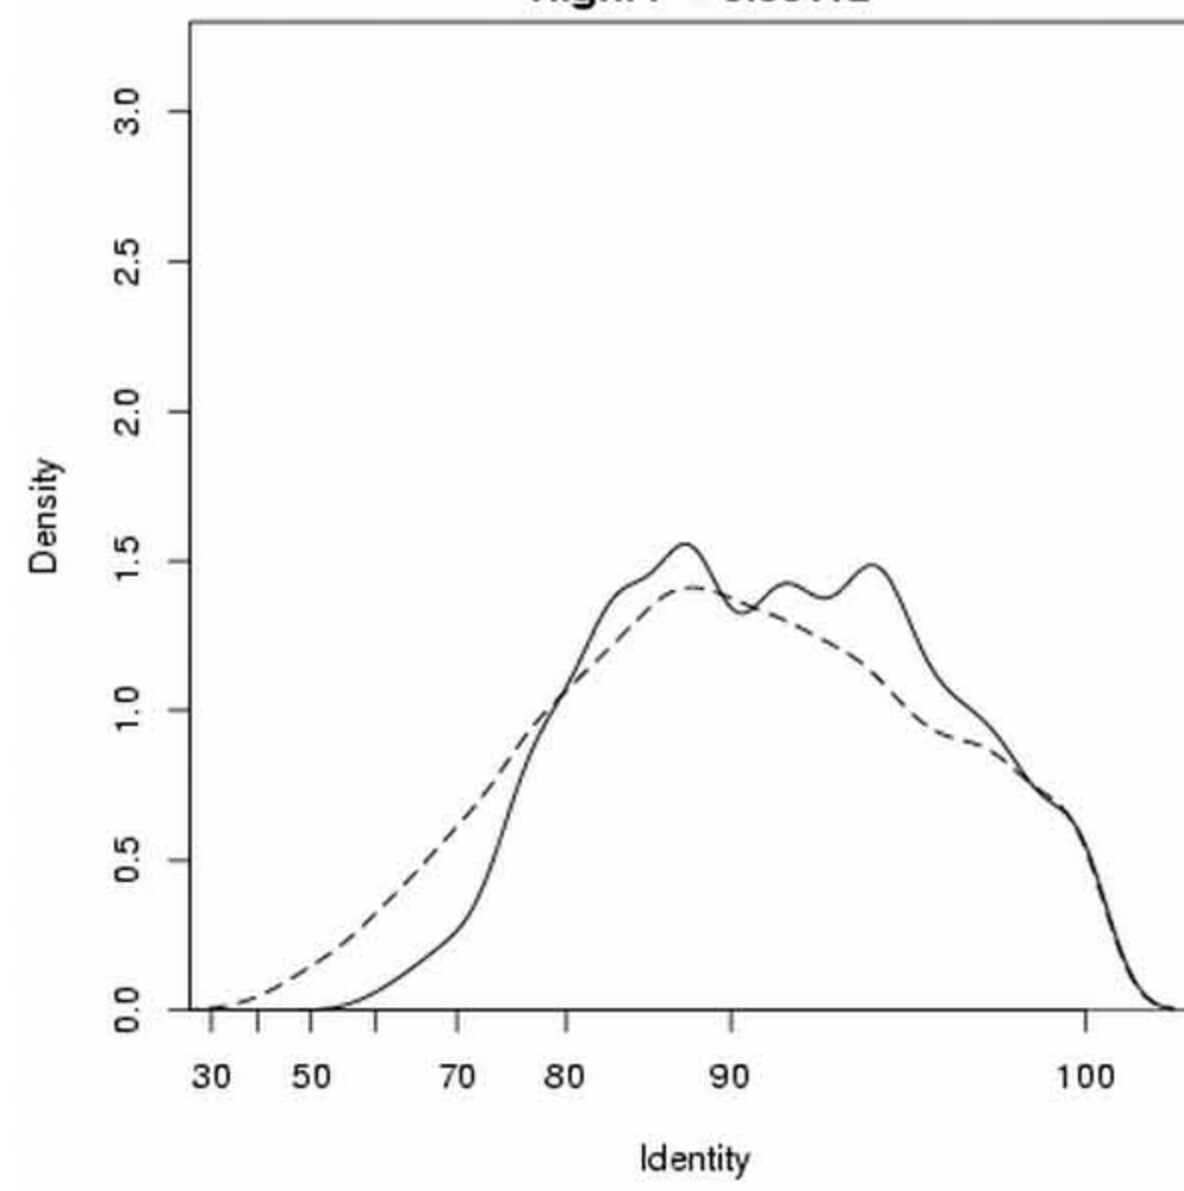

**cell cycle**  
N = 340  
High: P = 0.00645

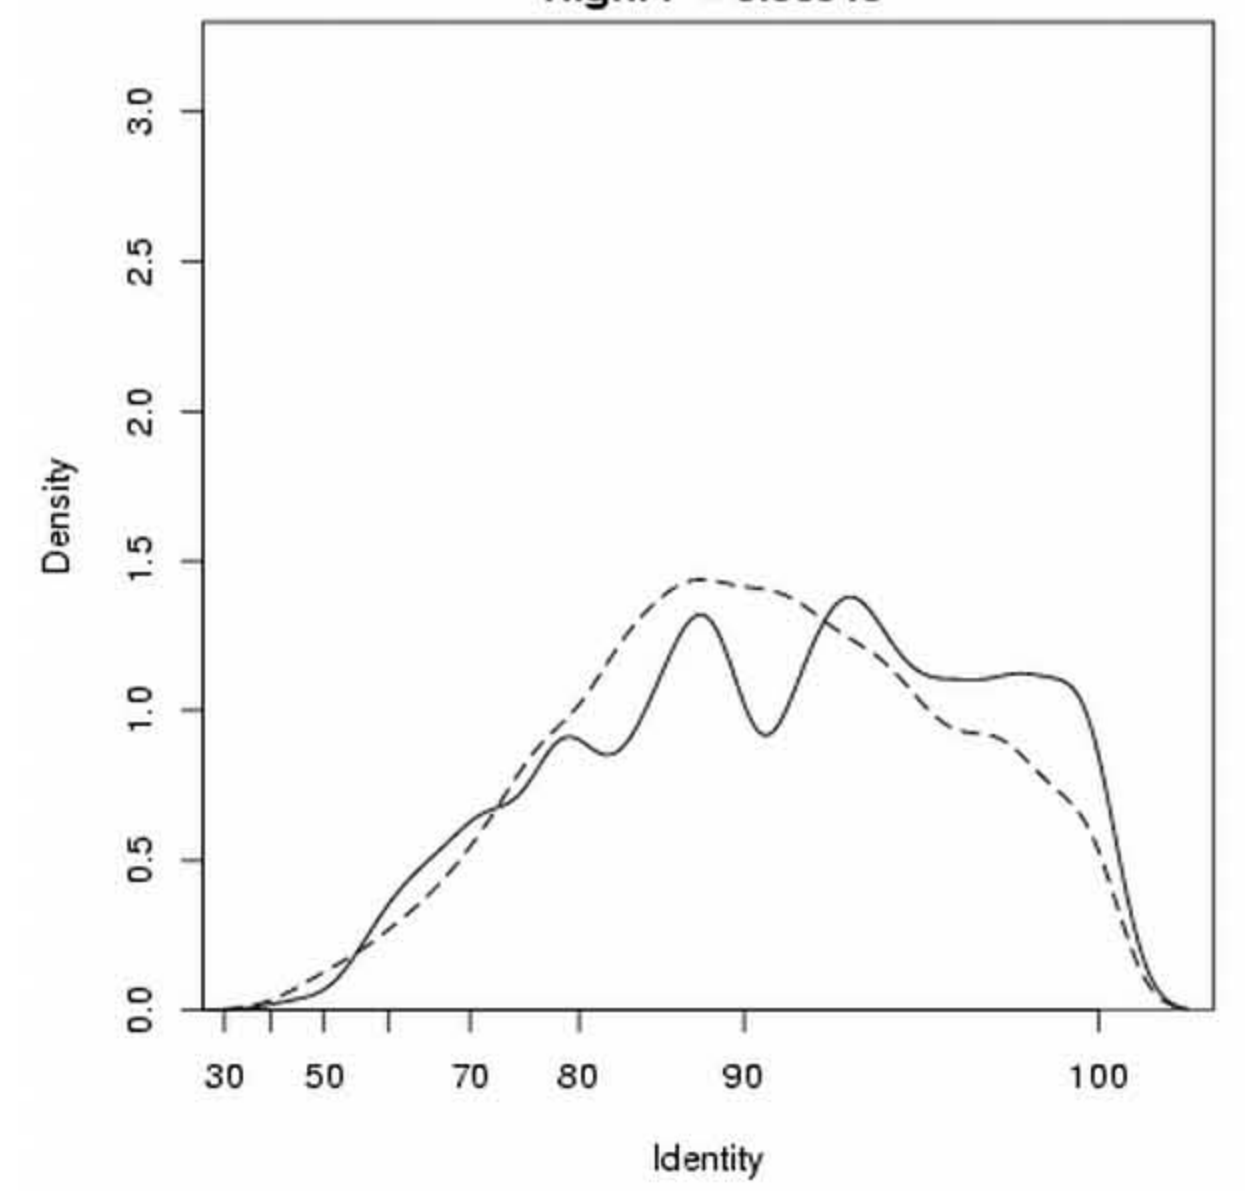



**B****response to biotic stimulus**  
N = 318  
Low: P = 4.08e-49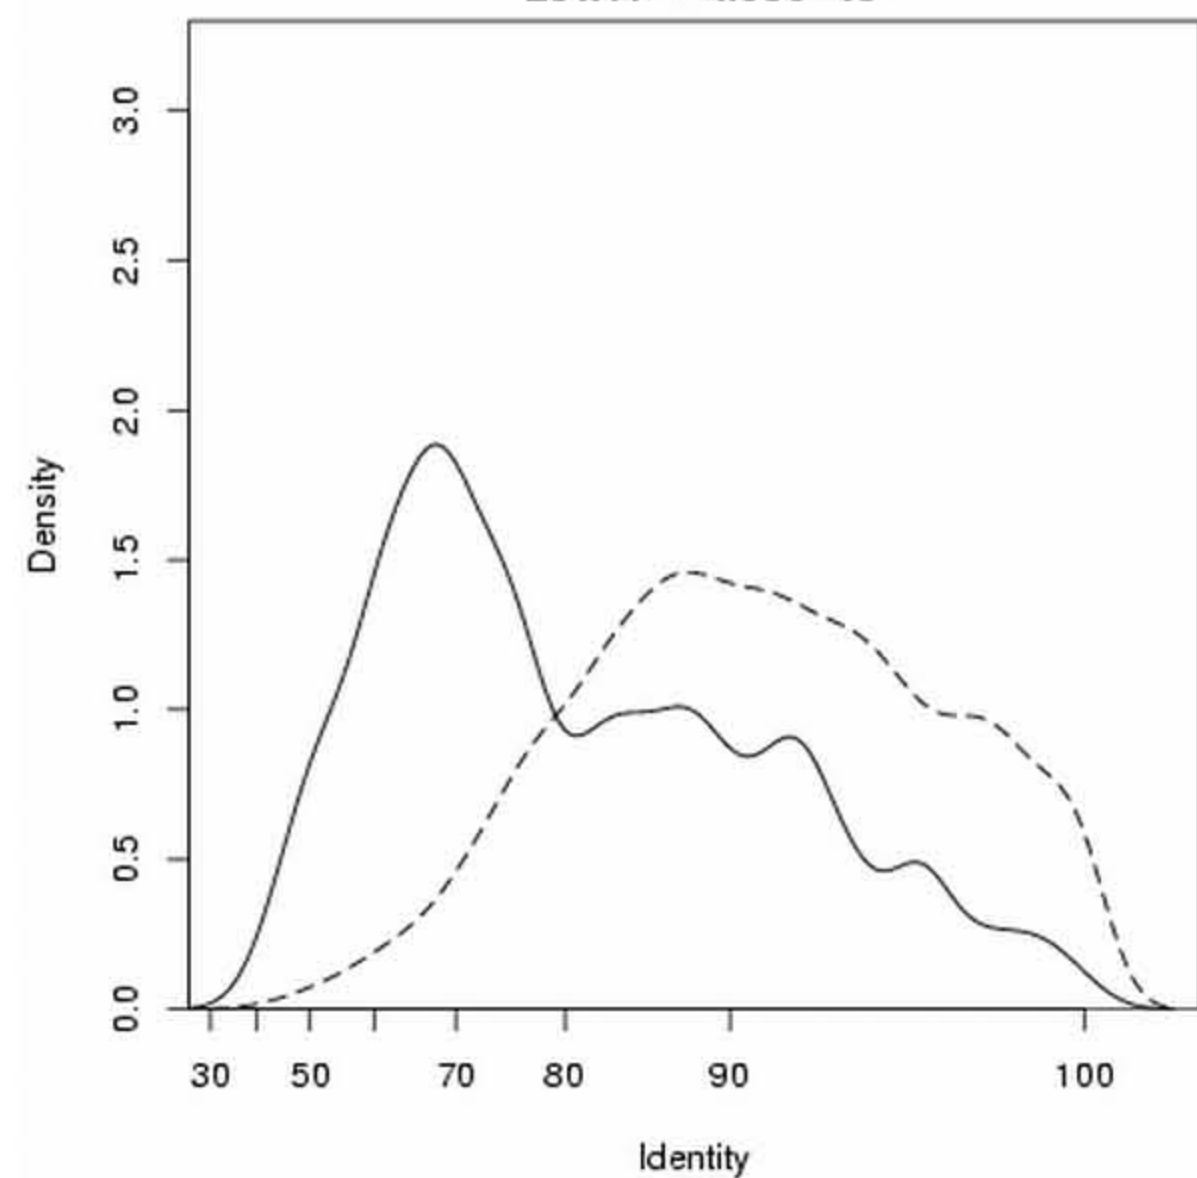**Immune response**  
N = 270  
Low: P = 1.16e-44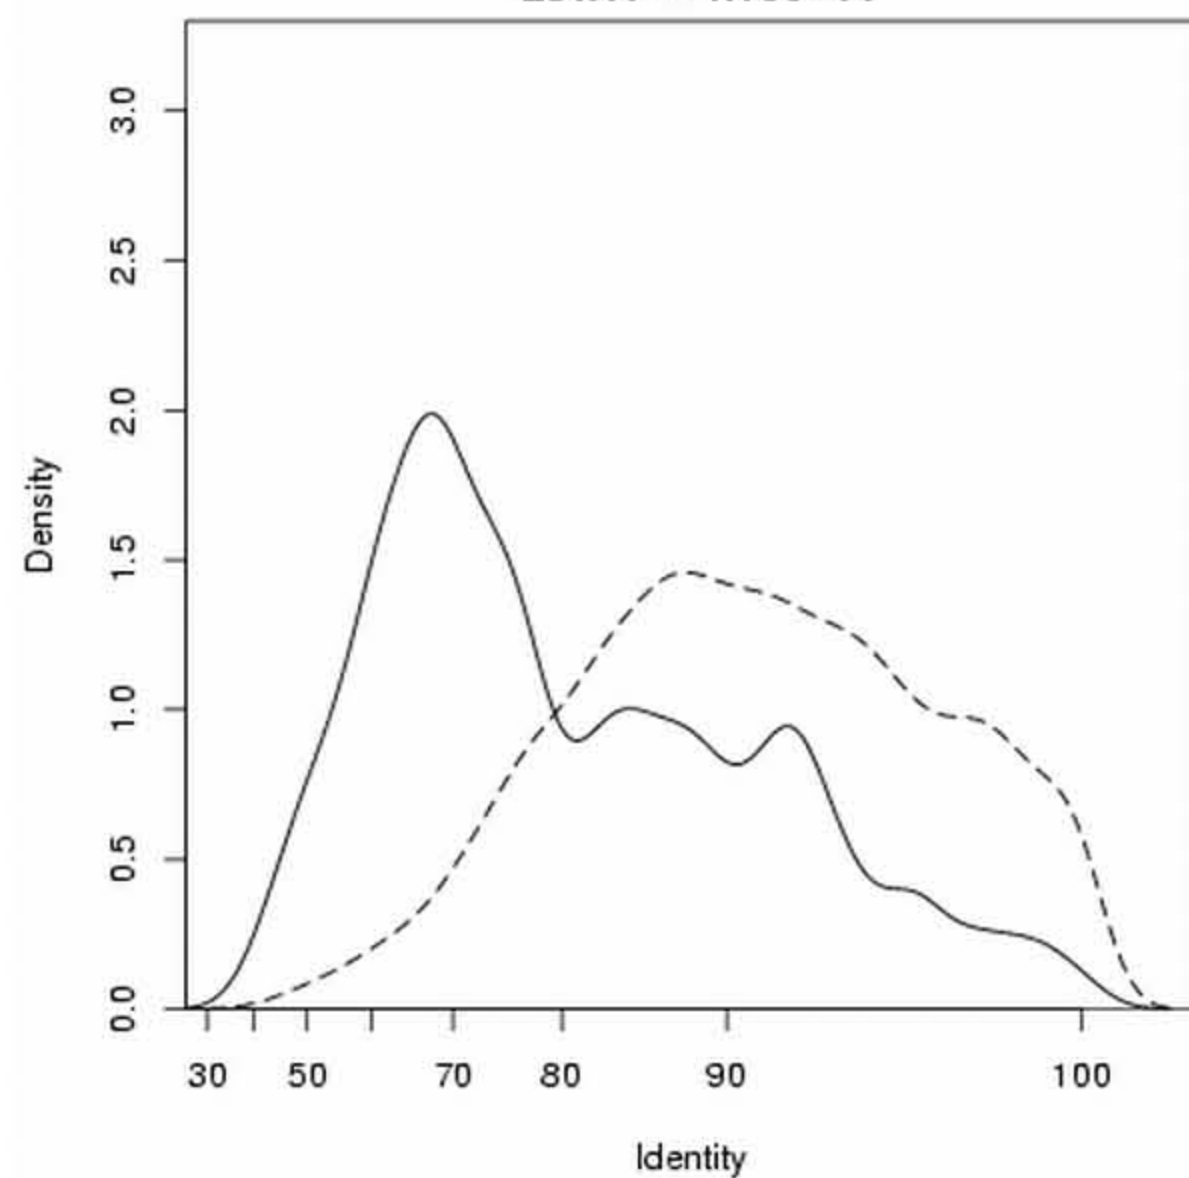**extracellular space**  
N = 179  
Low: P = 3.49e-37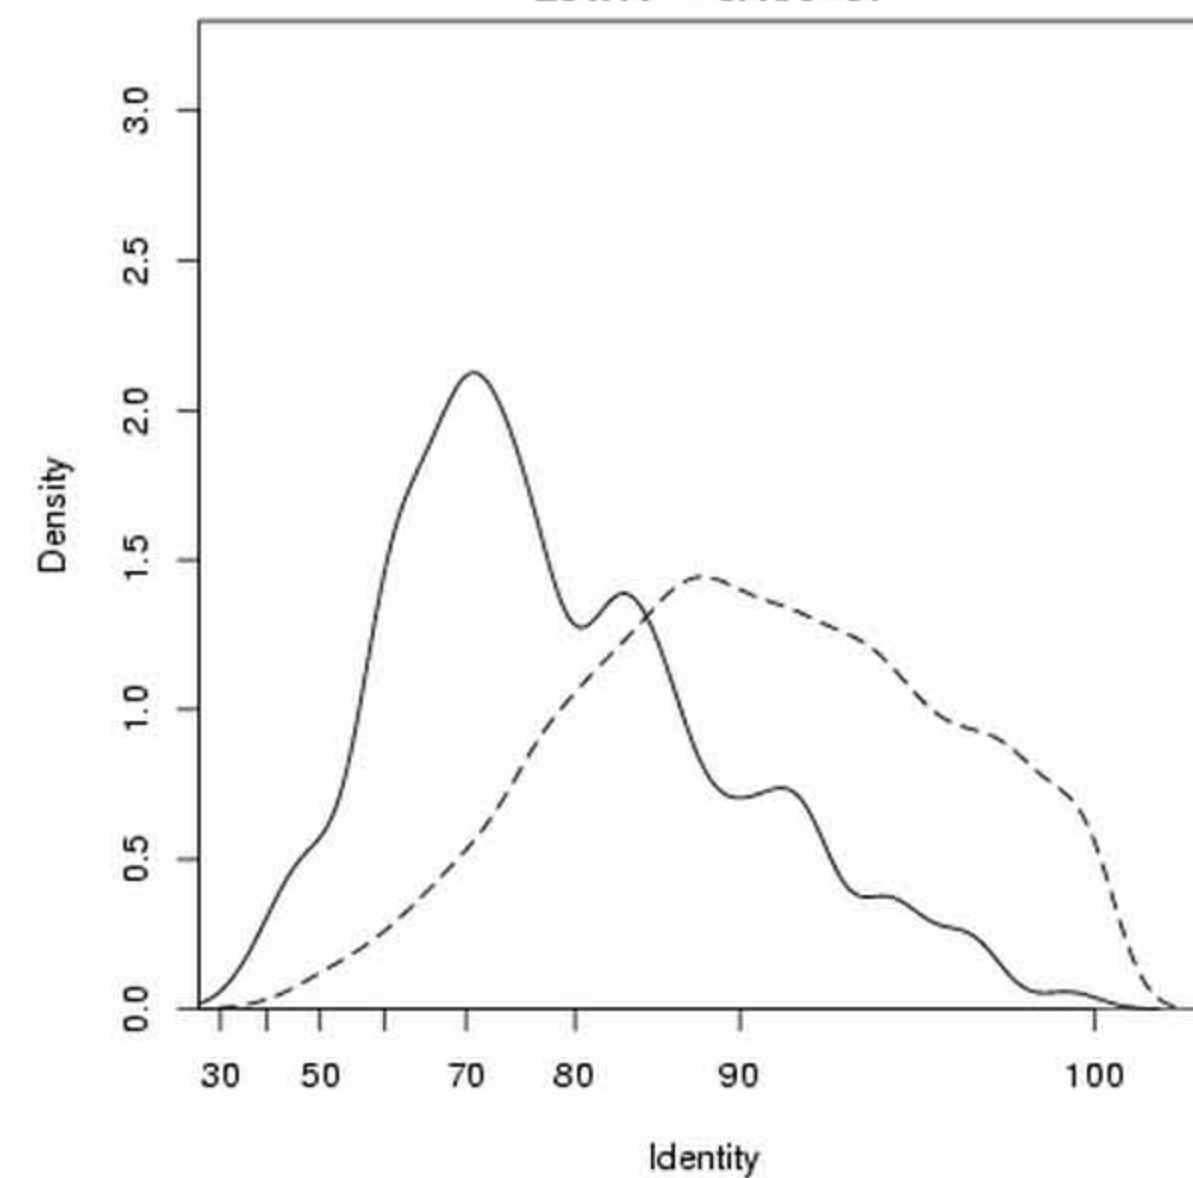**response to stress**  
N = 446  
Low: P = 5.05e-26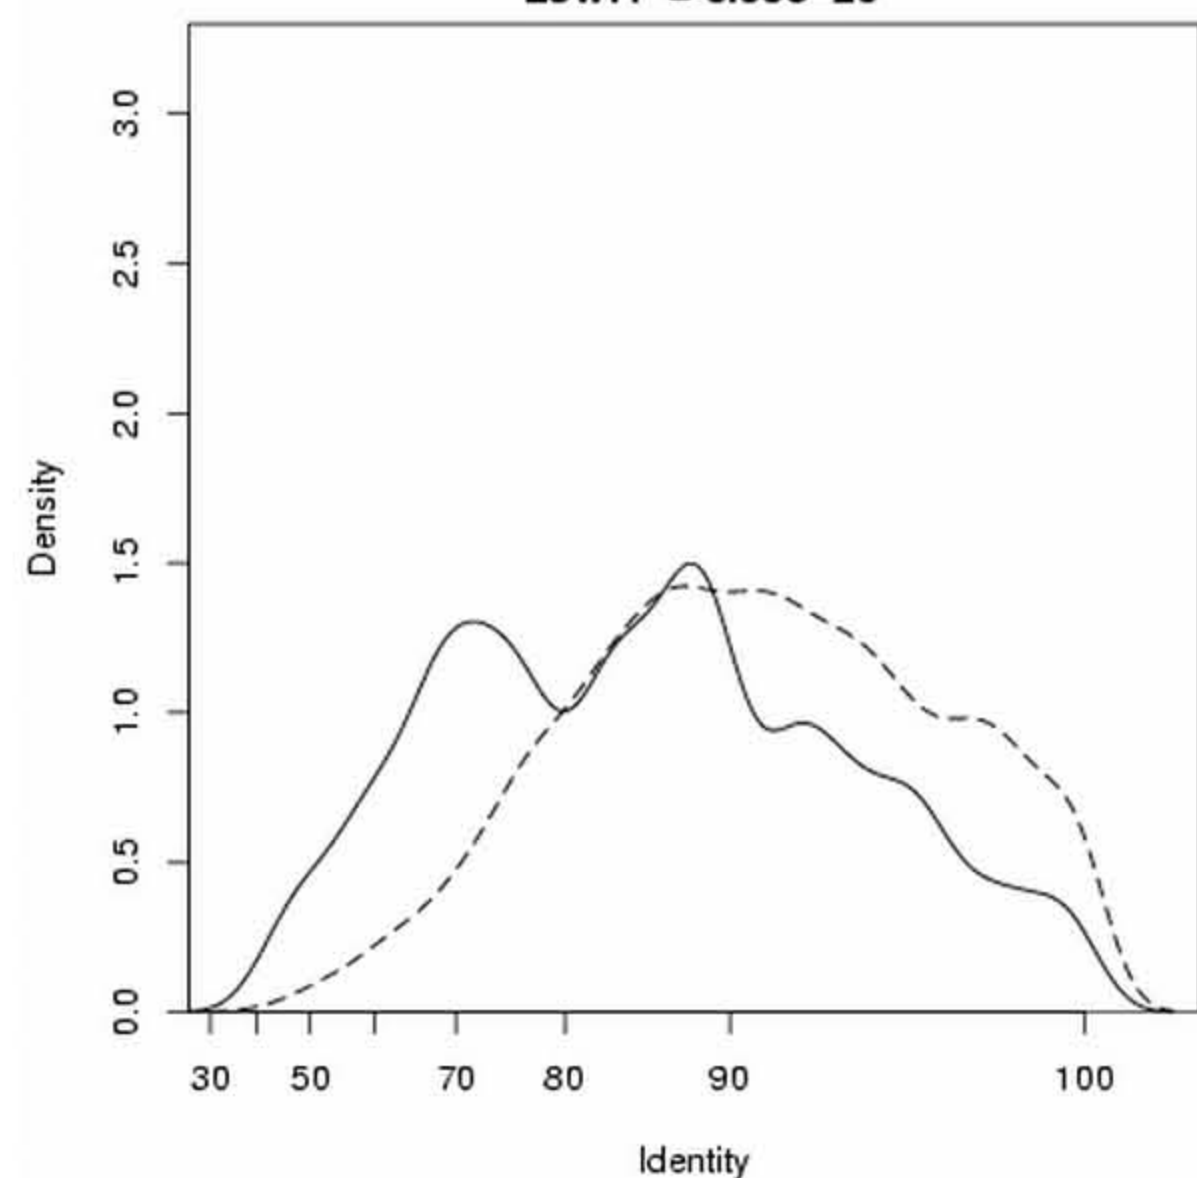**oxidoreductase activity**  
N = 309  
Low: P = 2.35e-12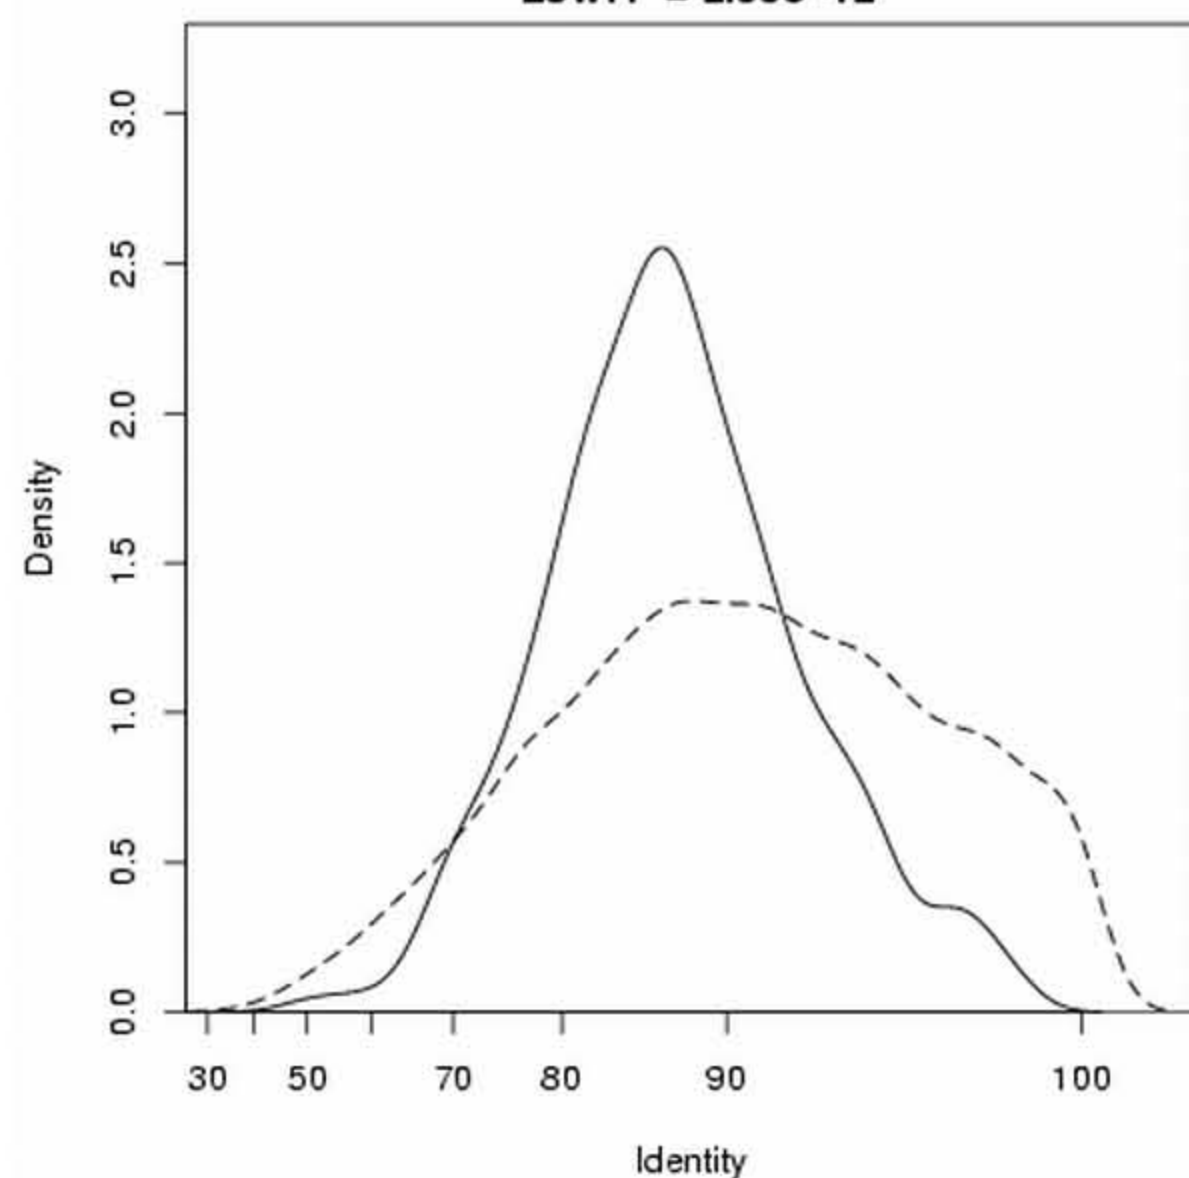**receptor activity**  
N = 391  
Low: P = 1.11e-11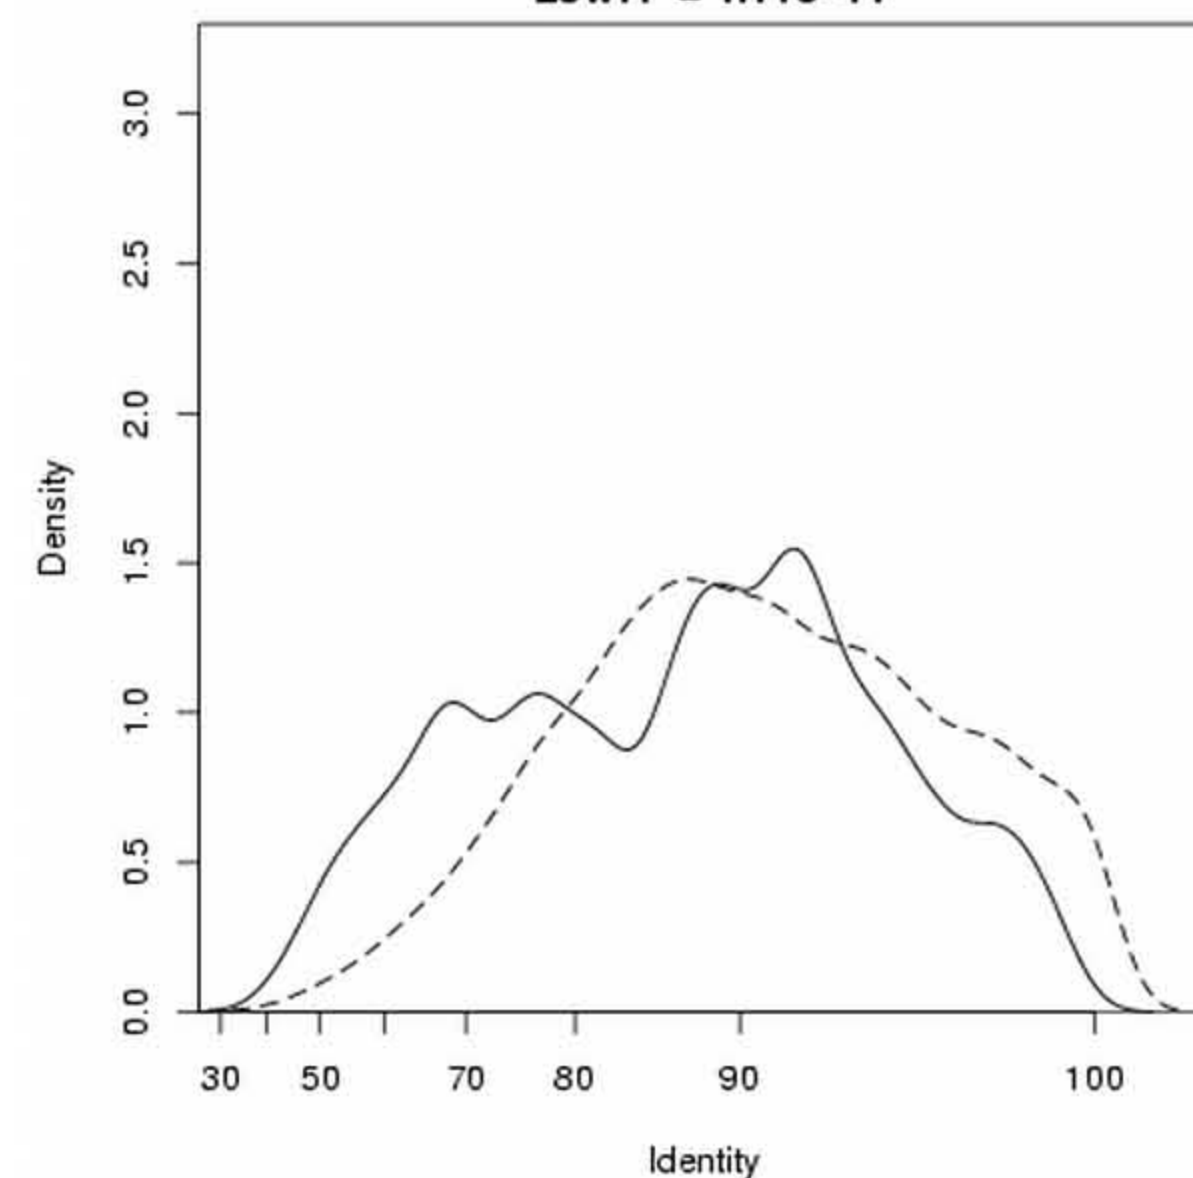**receptor binding**  
N = 221  
Low: P = 2.15e-11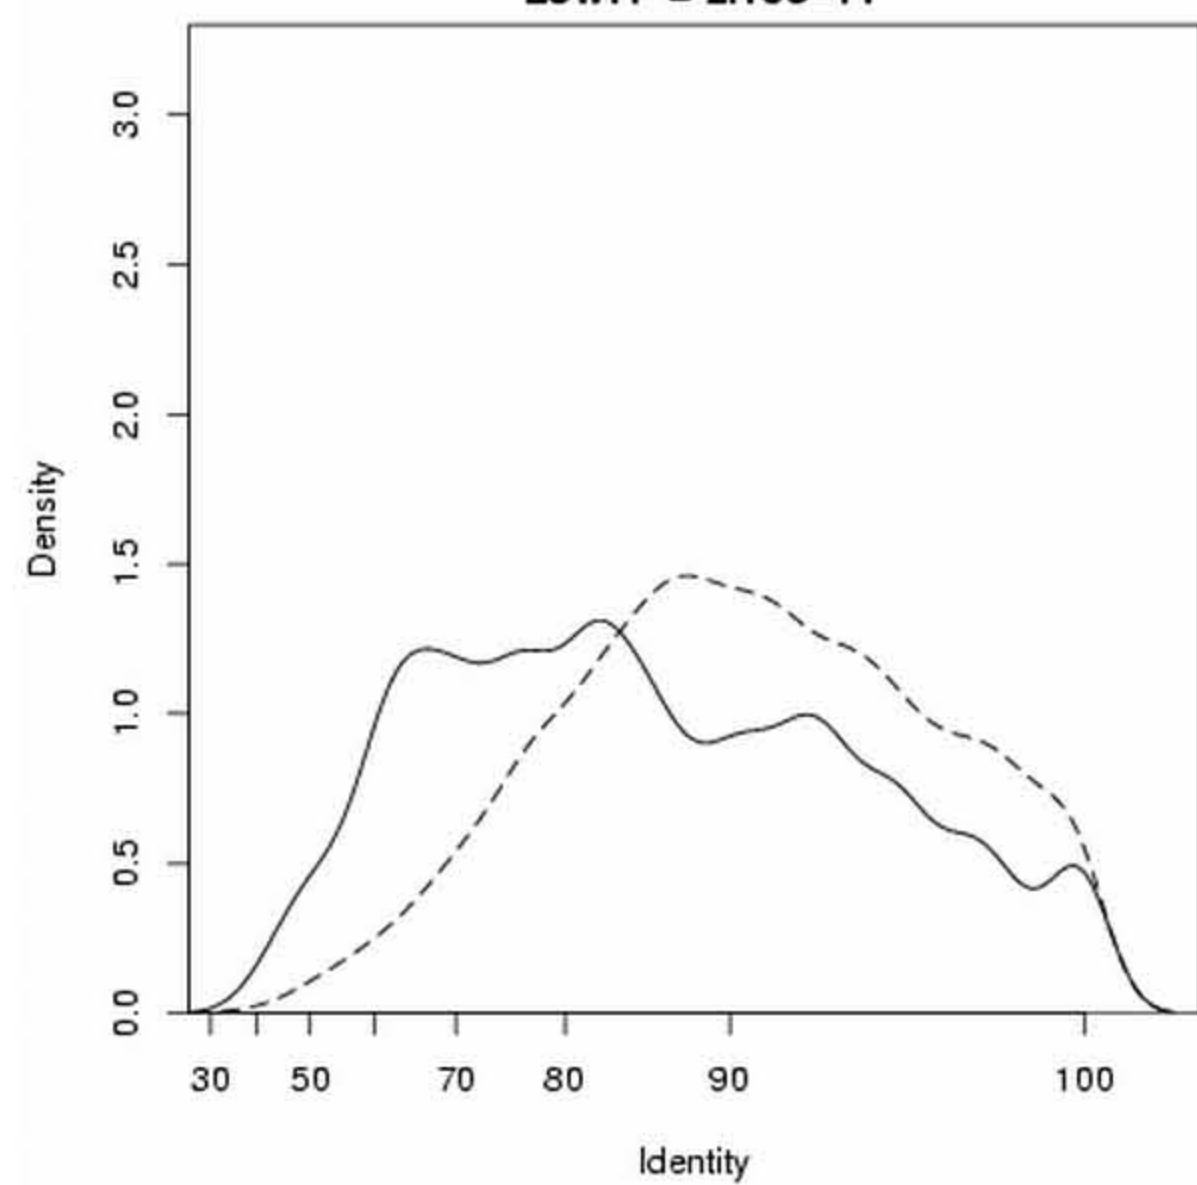**lipid metabolism**  
N = 260  
Low: P = 5.95e-11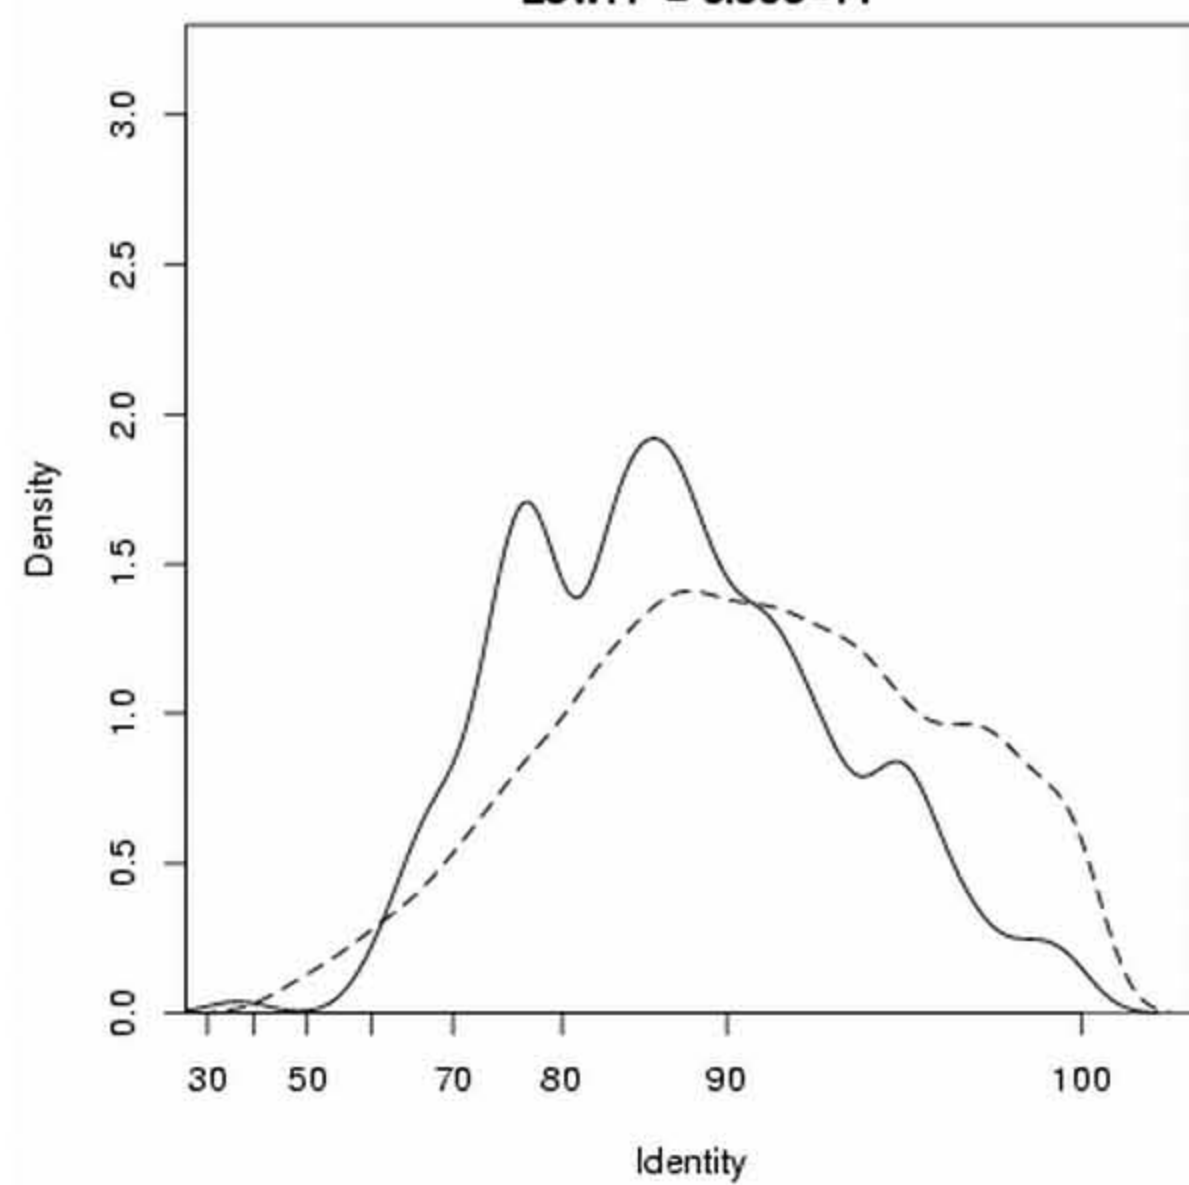**electron transport**  
N = 151  
Low: P = 7.64e-10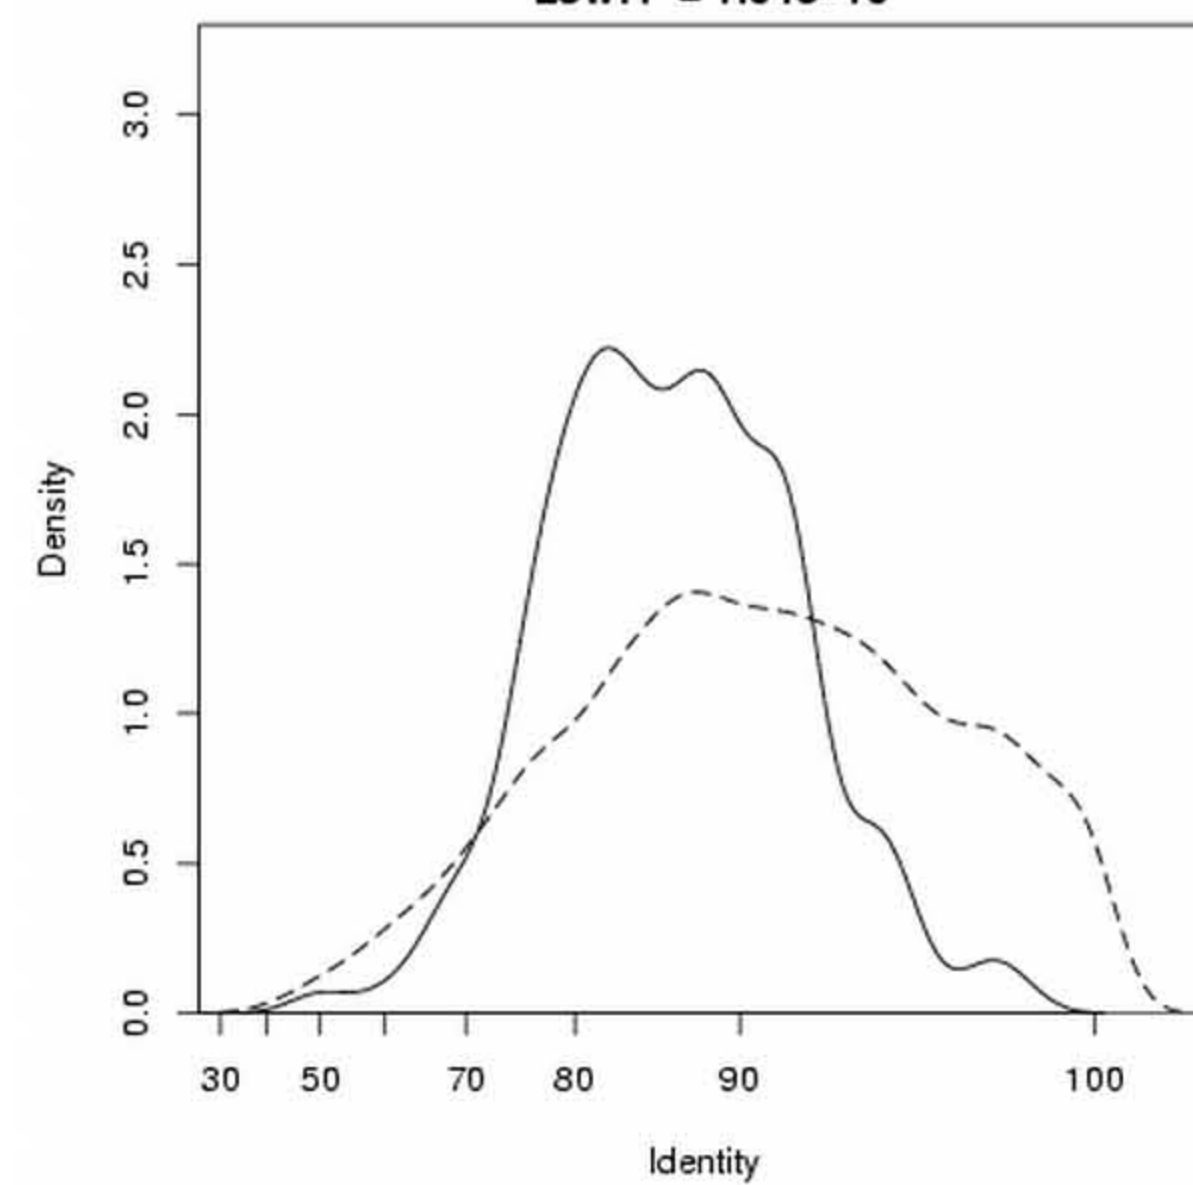**lysosome**  
N = 77  
Low: P = 6.38e-08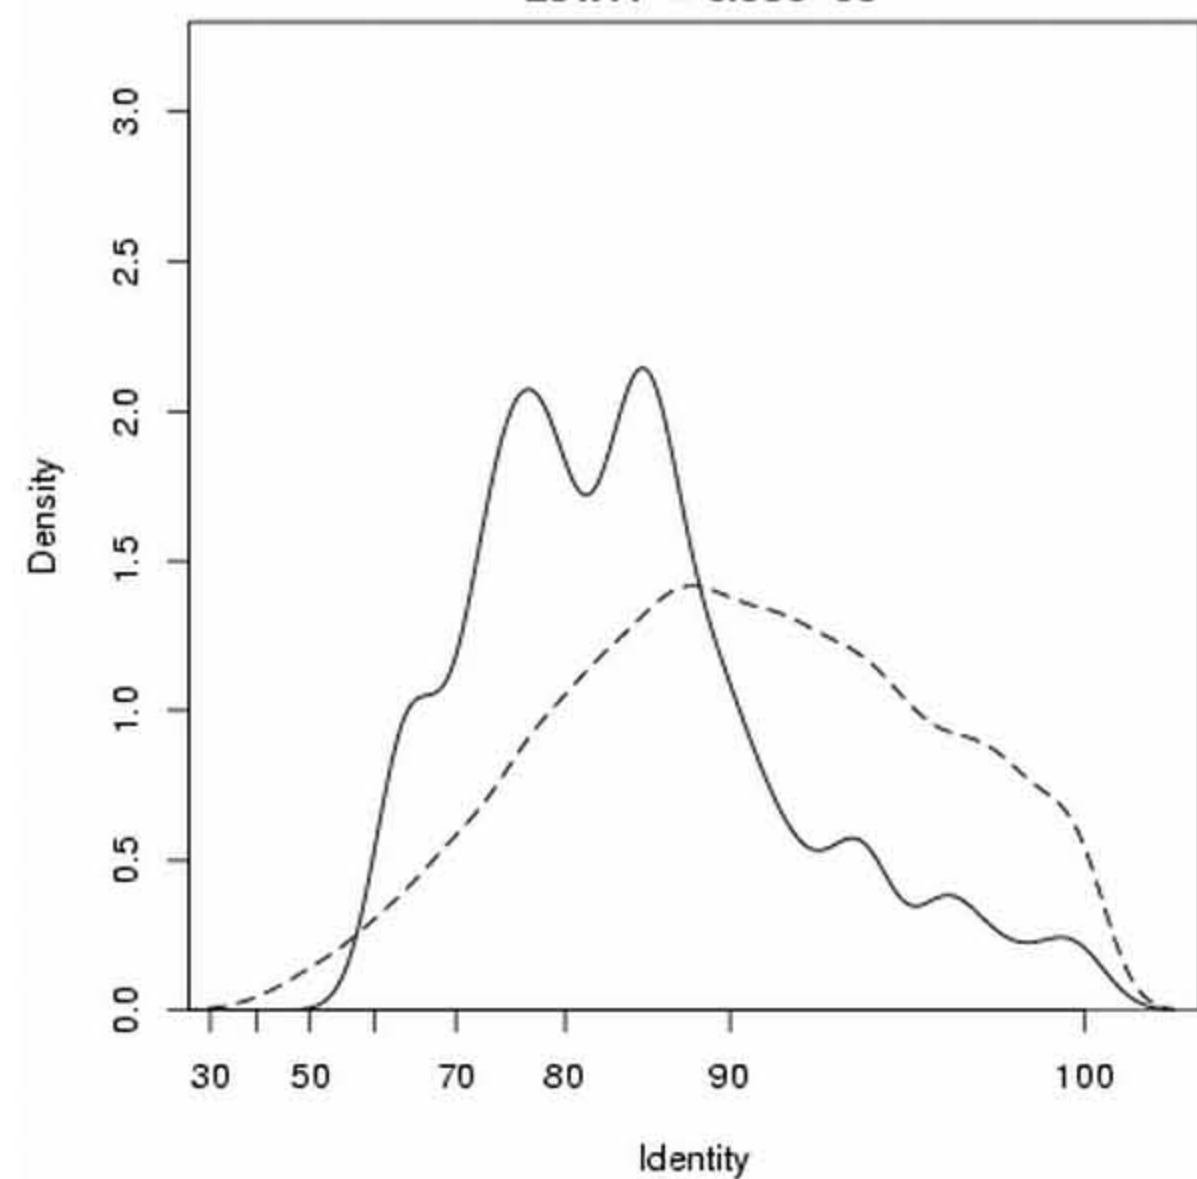**peptidase activity**  
N = 227  
Low: P = 6.15e-07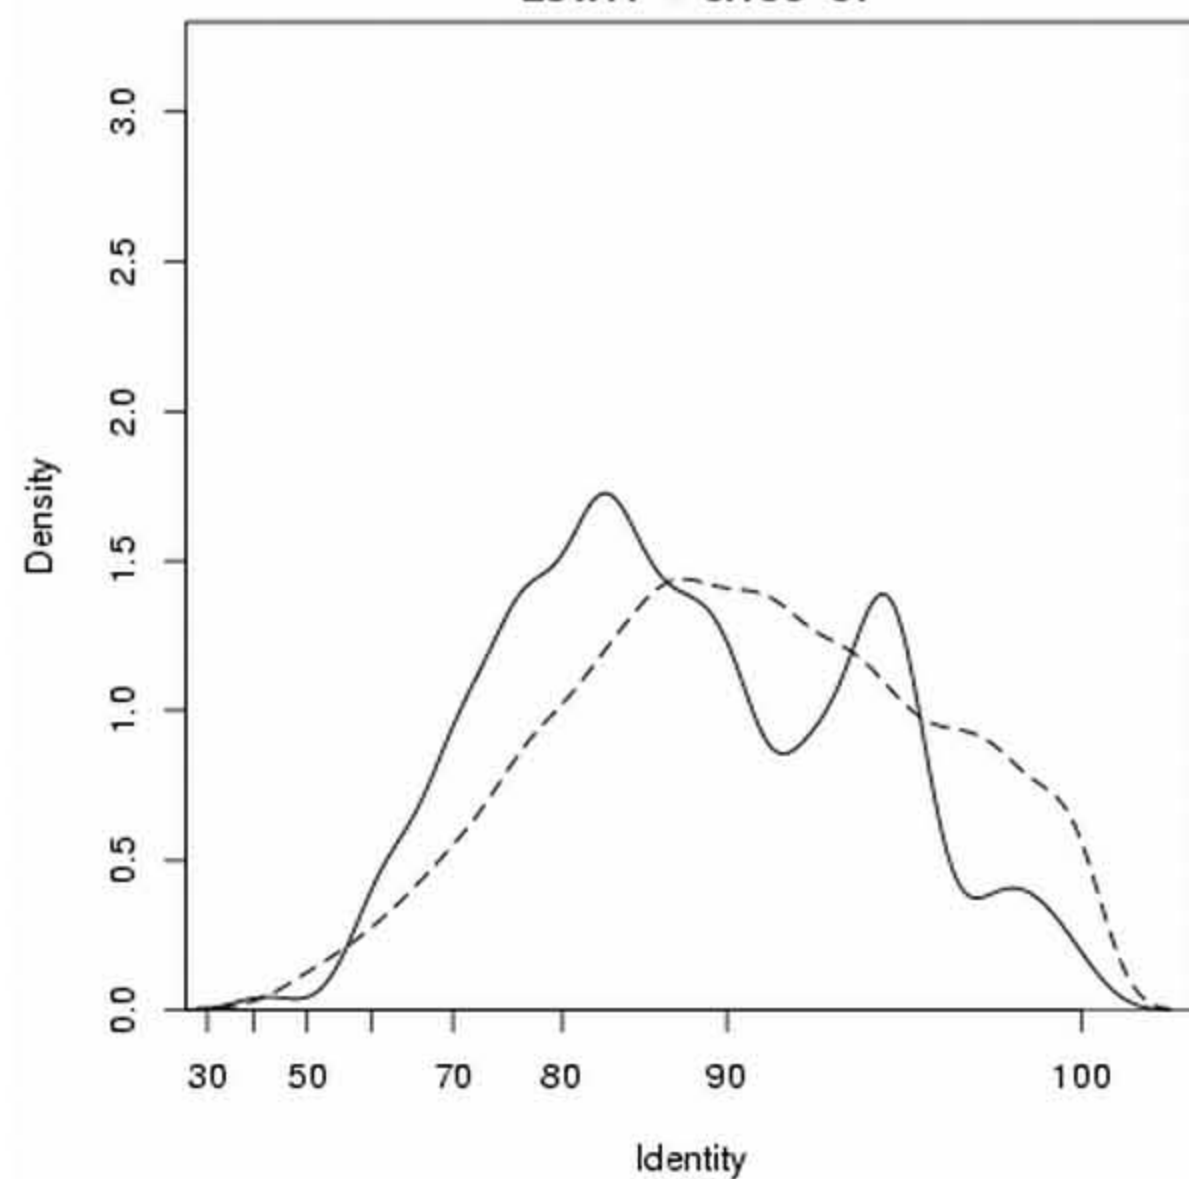**cell proliferation**  
N = 258  
Low: P = 1.65e-06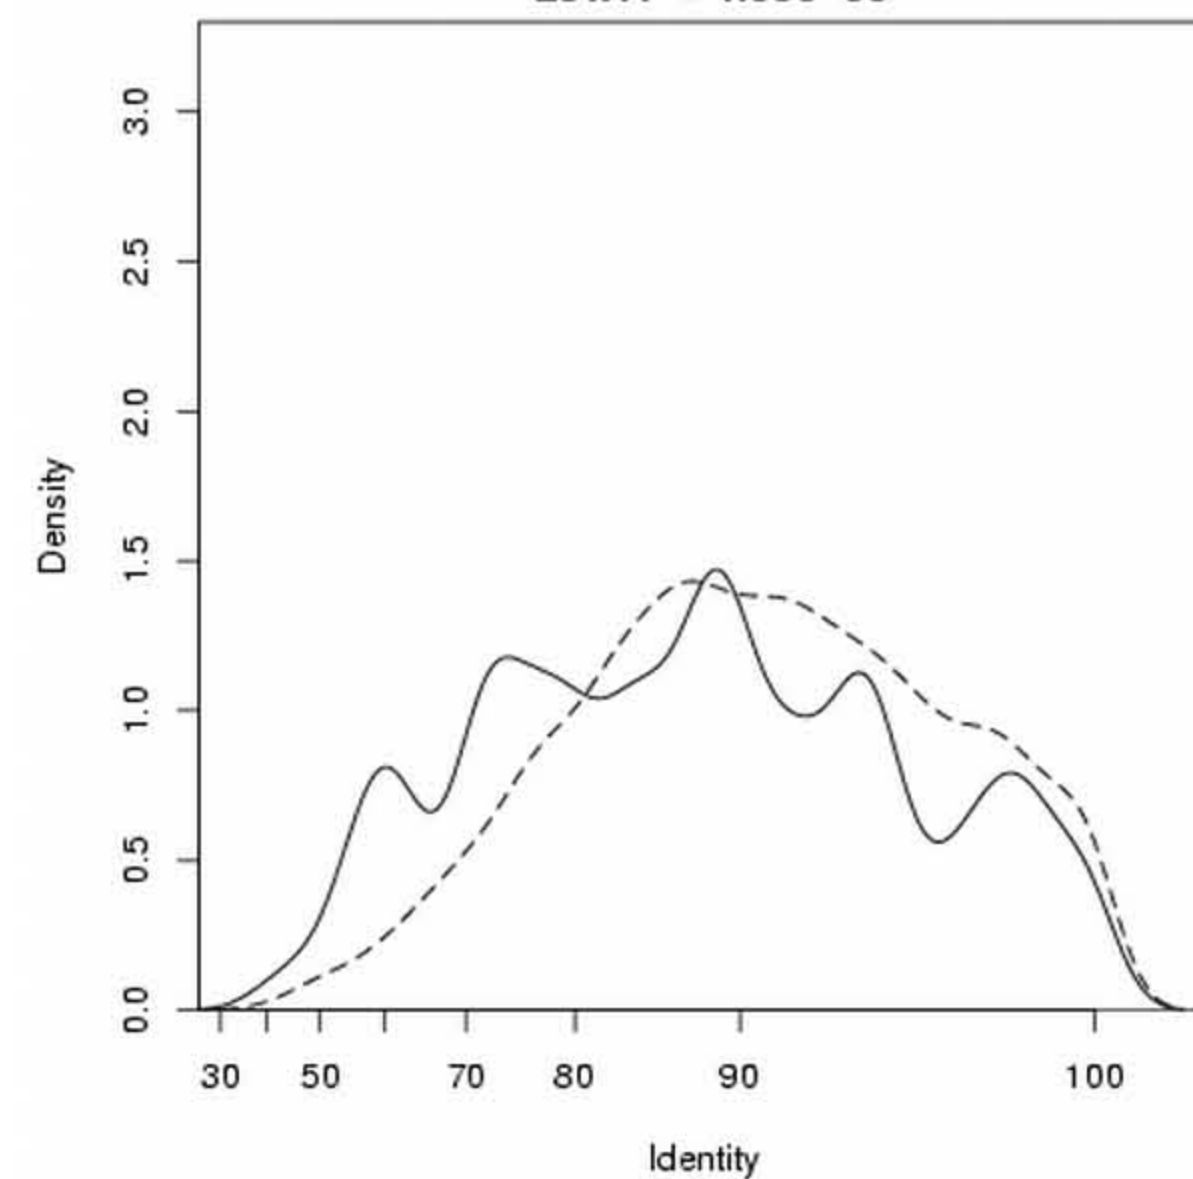

**cell adhesion**  
N = 242  
Low: P = 2.16e-06

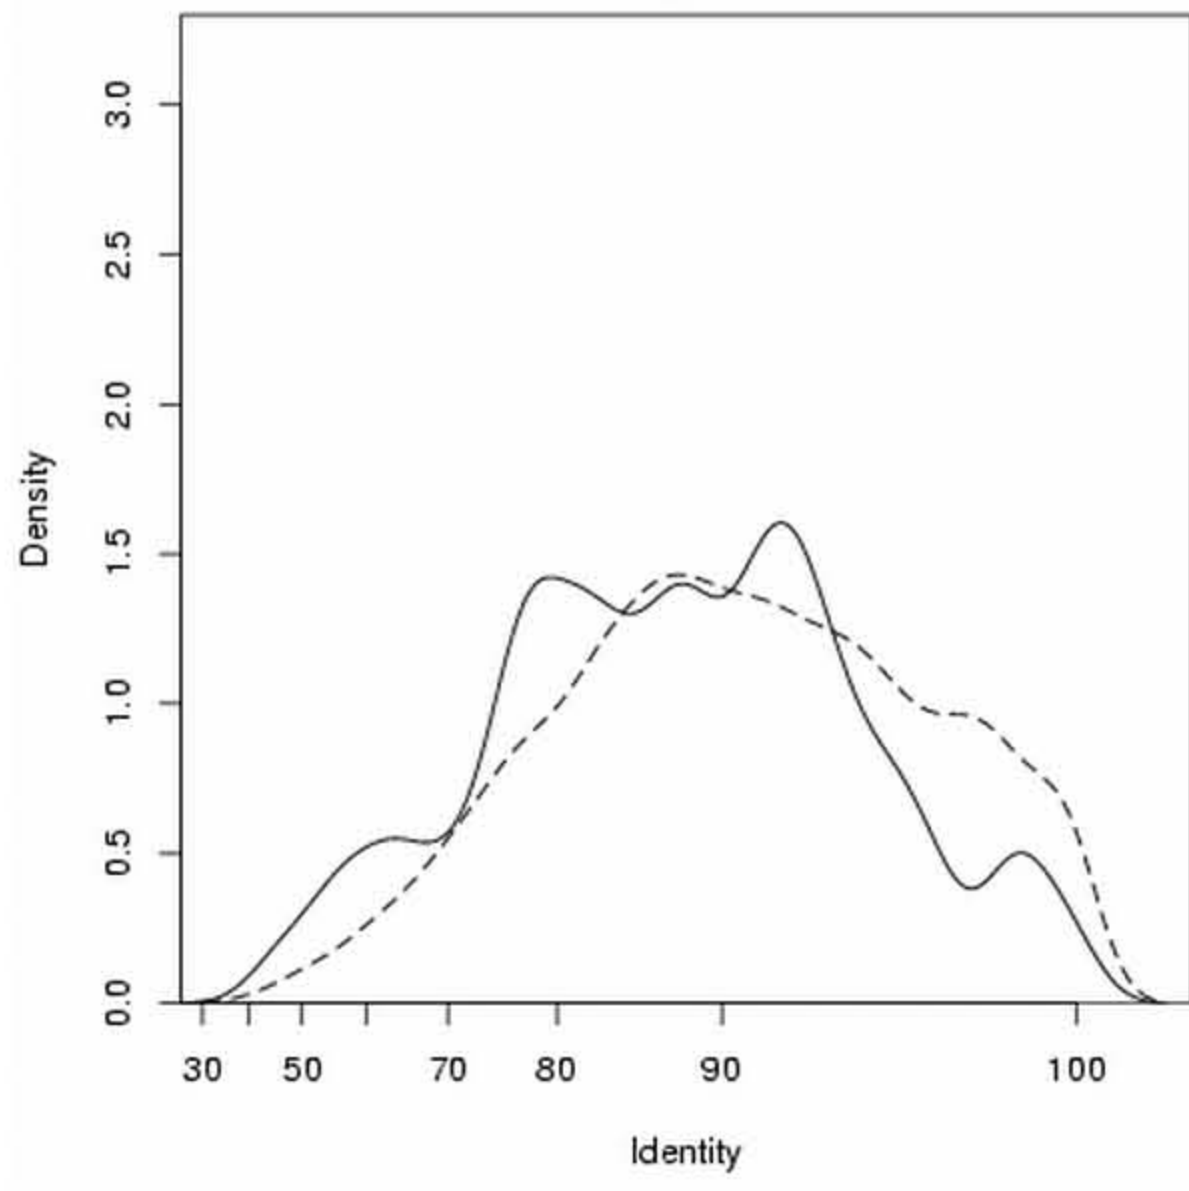

**mitochondrion**  
N = 398  
Low: P = 3e-05

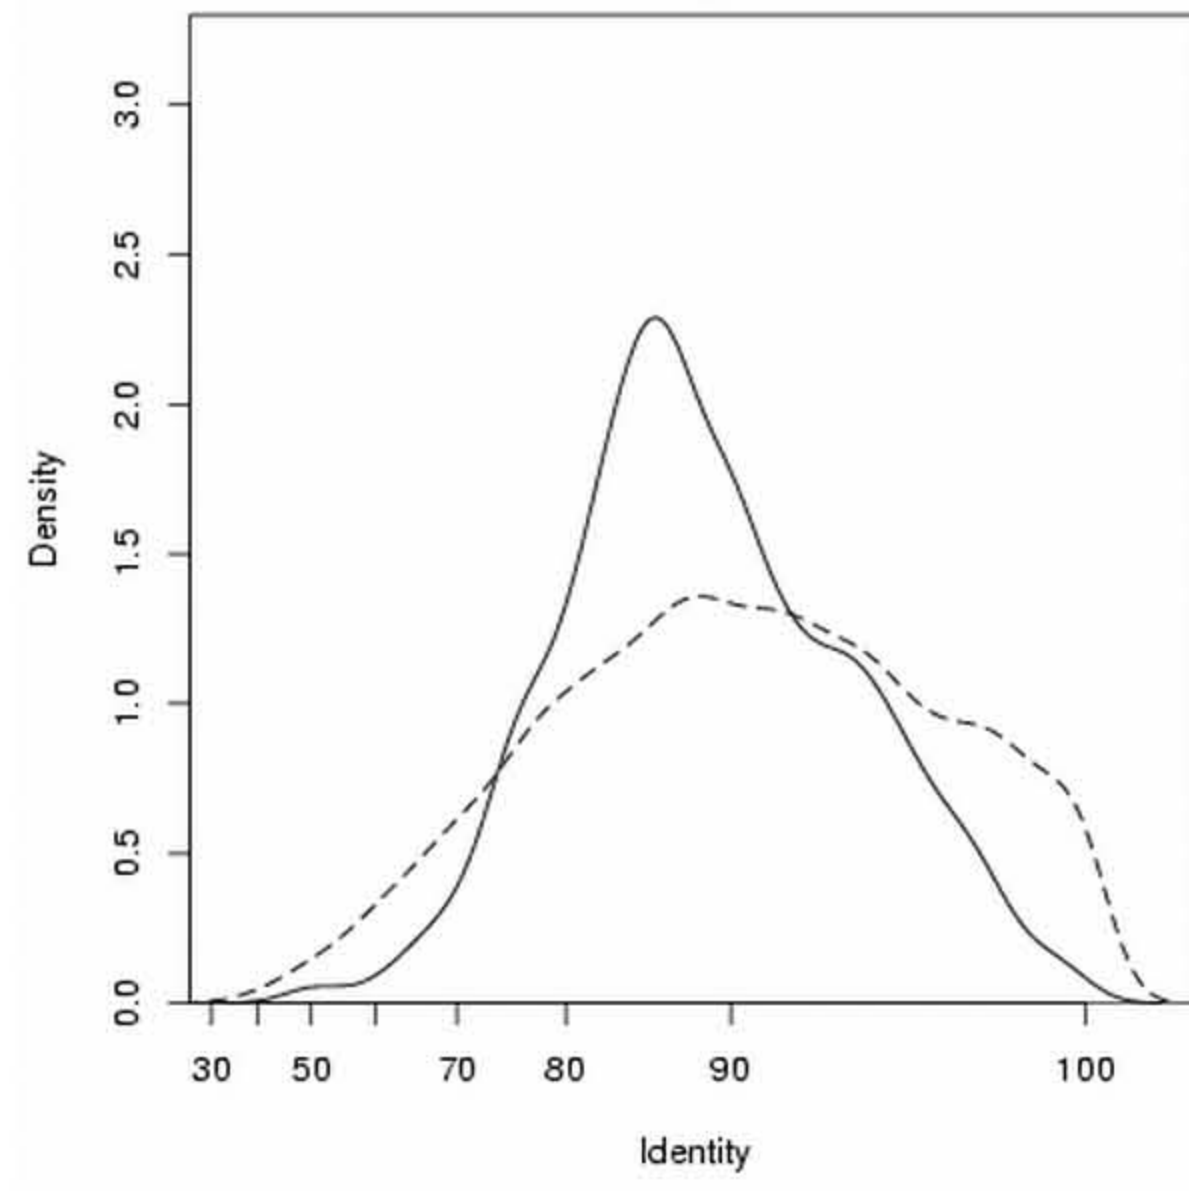

**proteolysis**  
N = 259  
Low: P = 4.53e-05

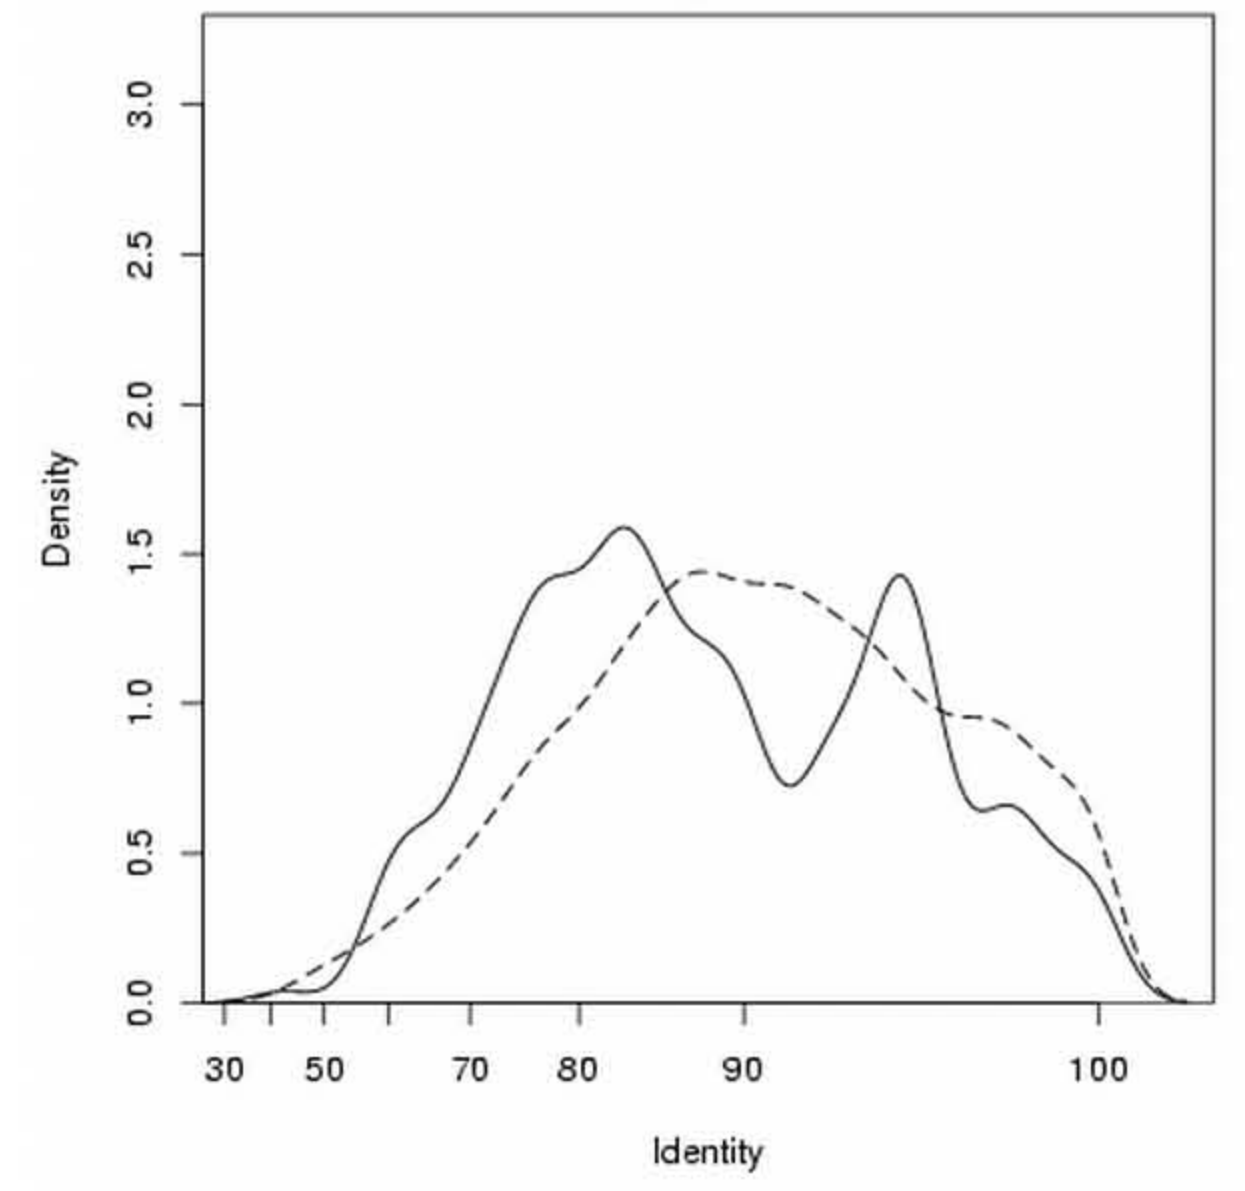

**extracellular matrix**  
N = 111  
Low: P = 5.52e-05

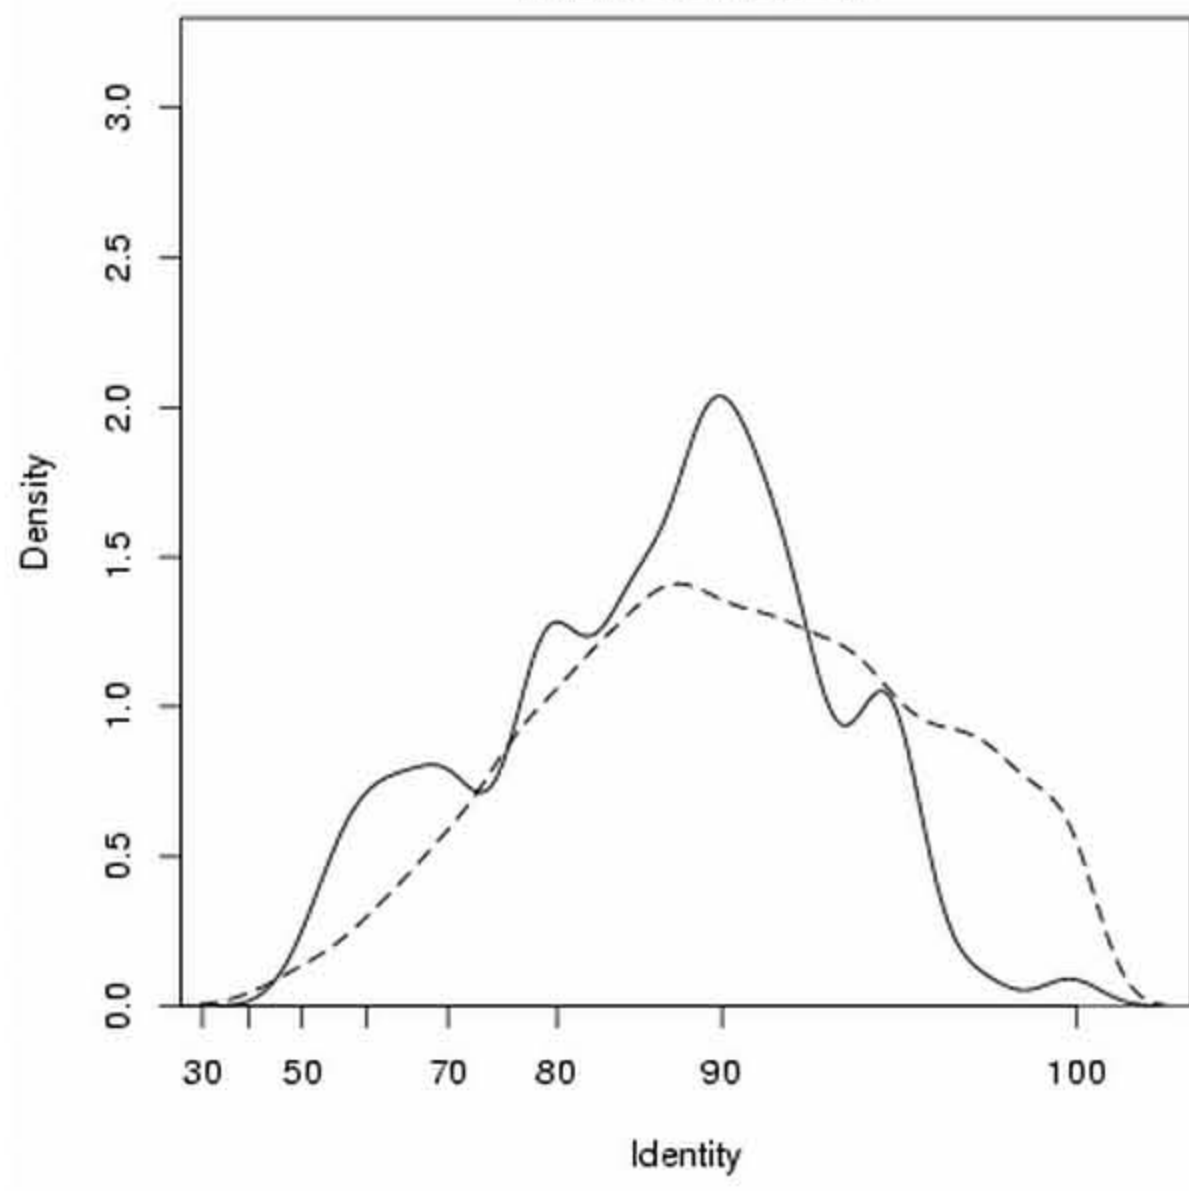

**peroxisome**  
N = 49  
Low: P = 8.02e-05

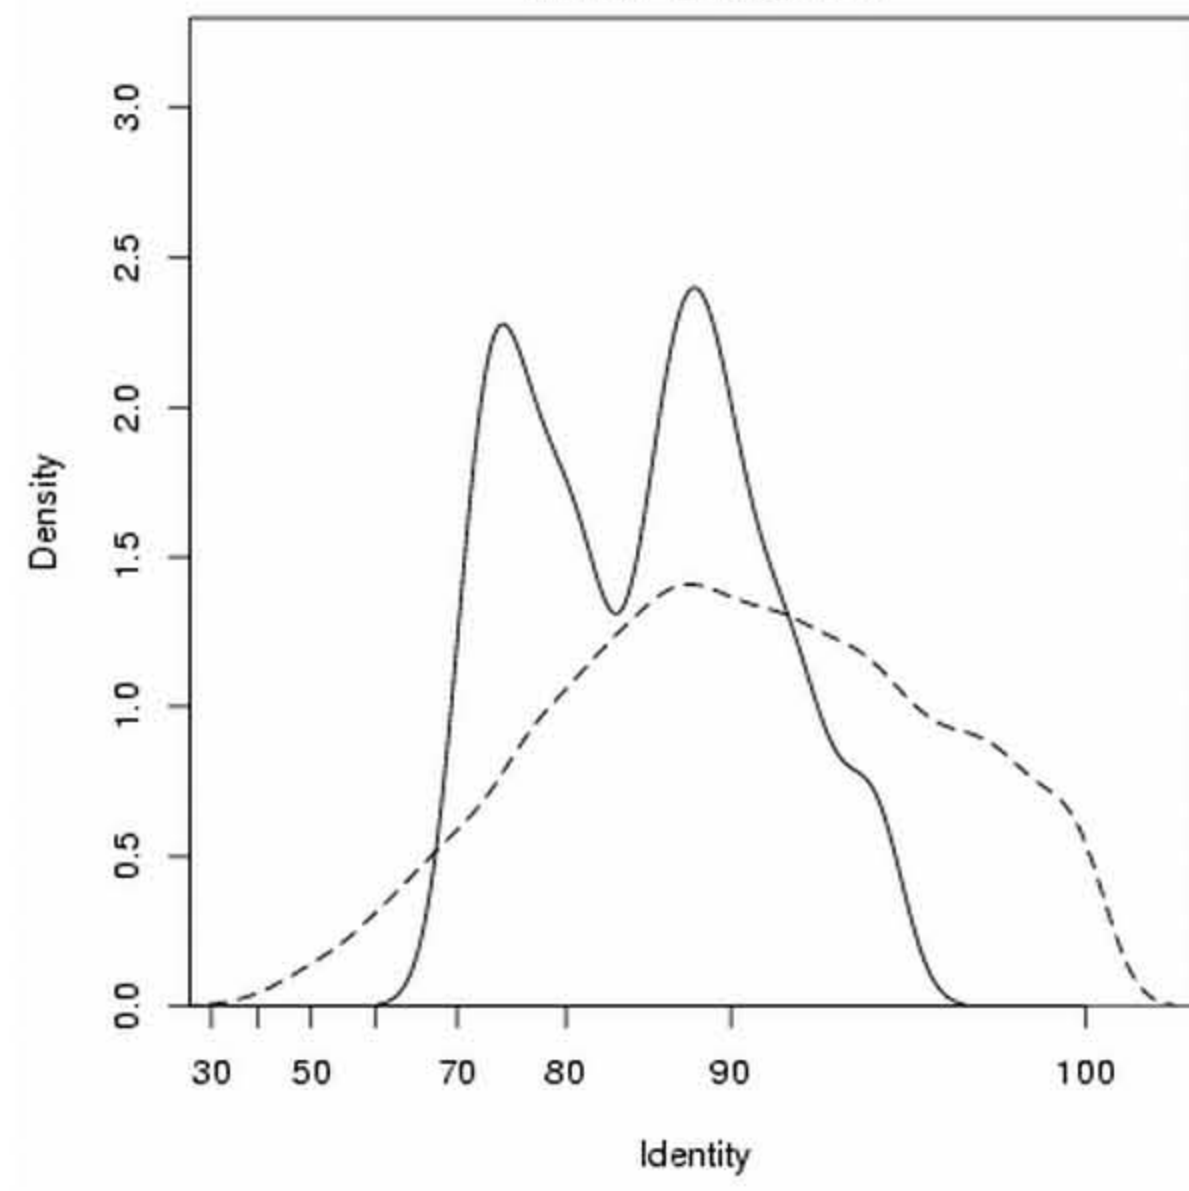

**nuclease activity**  
N = 60  
Low: P = 8.5e-05

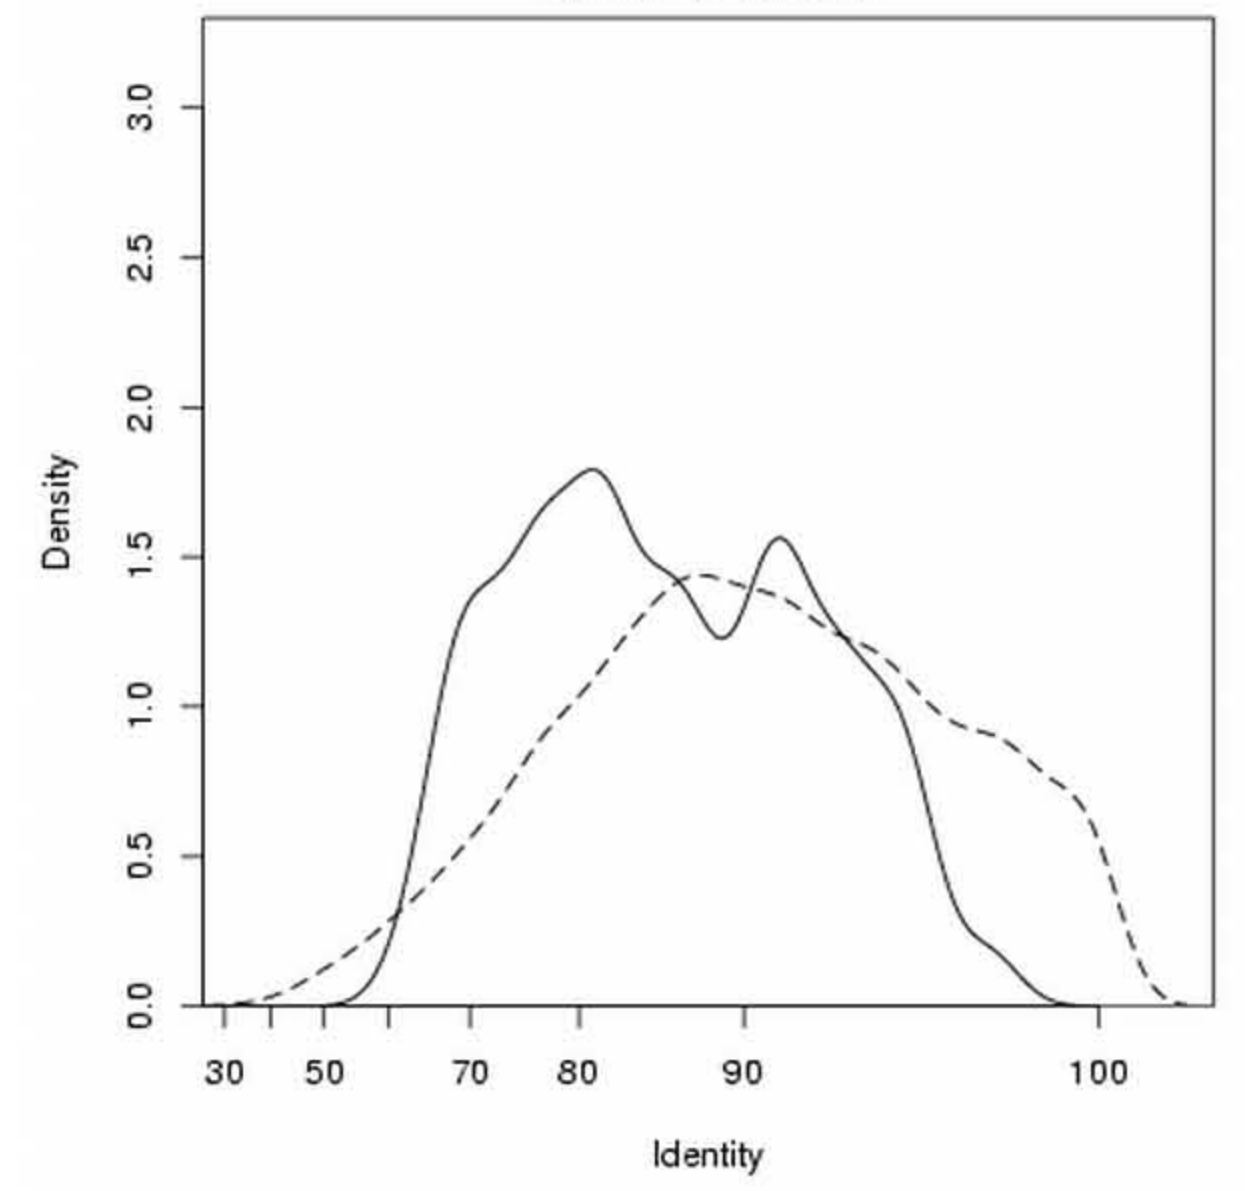

**plasma membrane**  
N = 608  
Low: P = 0.000291

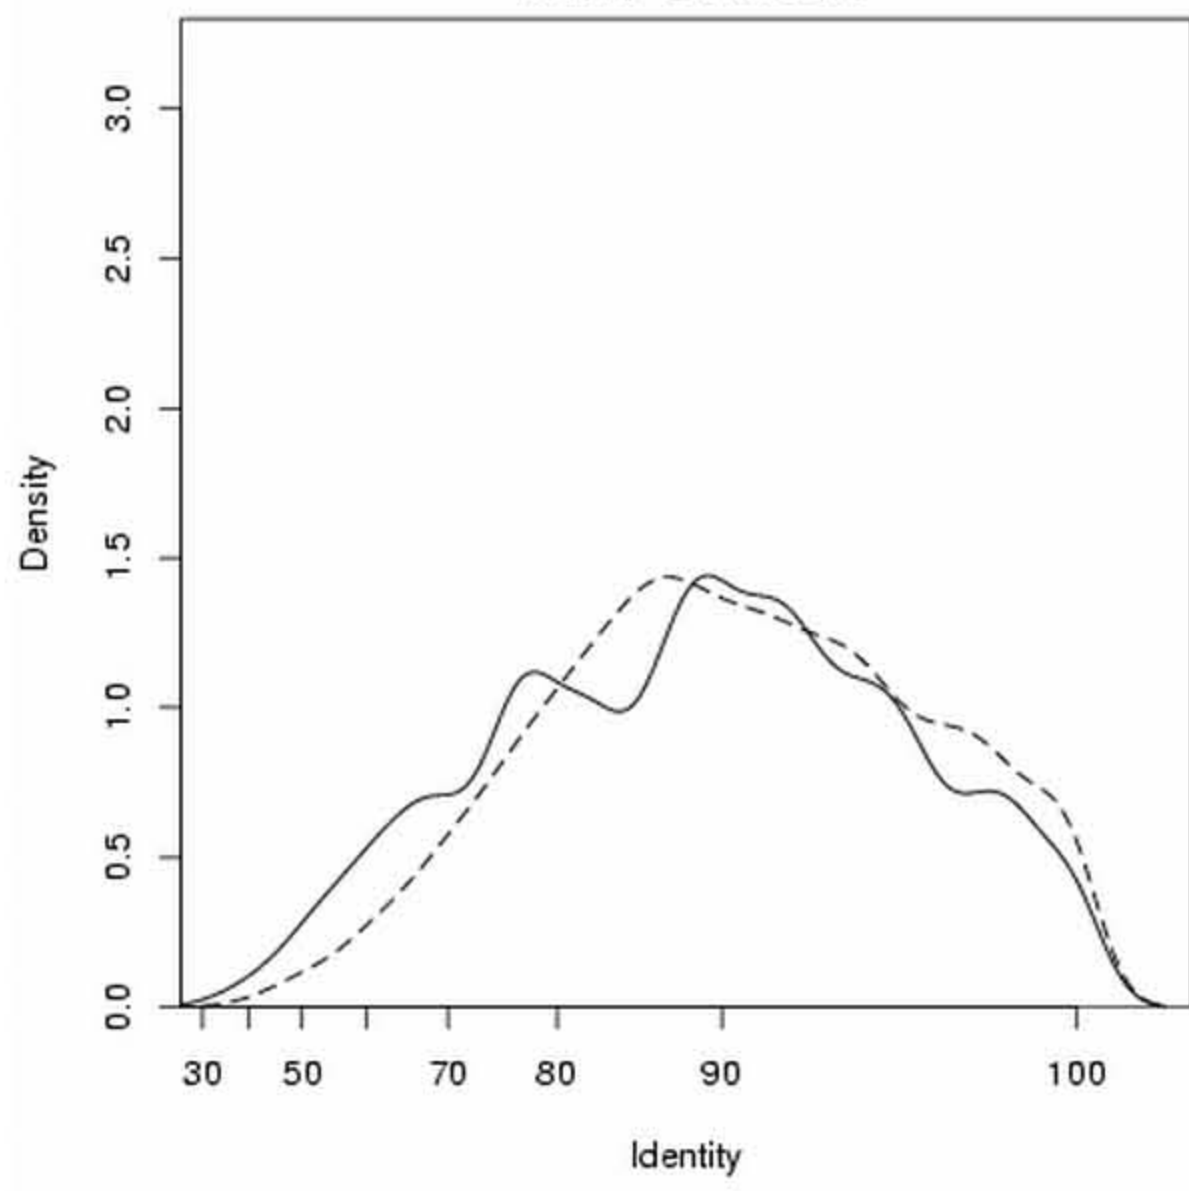

**apoptosis**  
N = 244  
Low: P = 0.00137

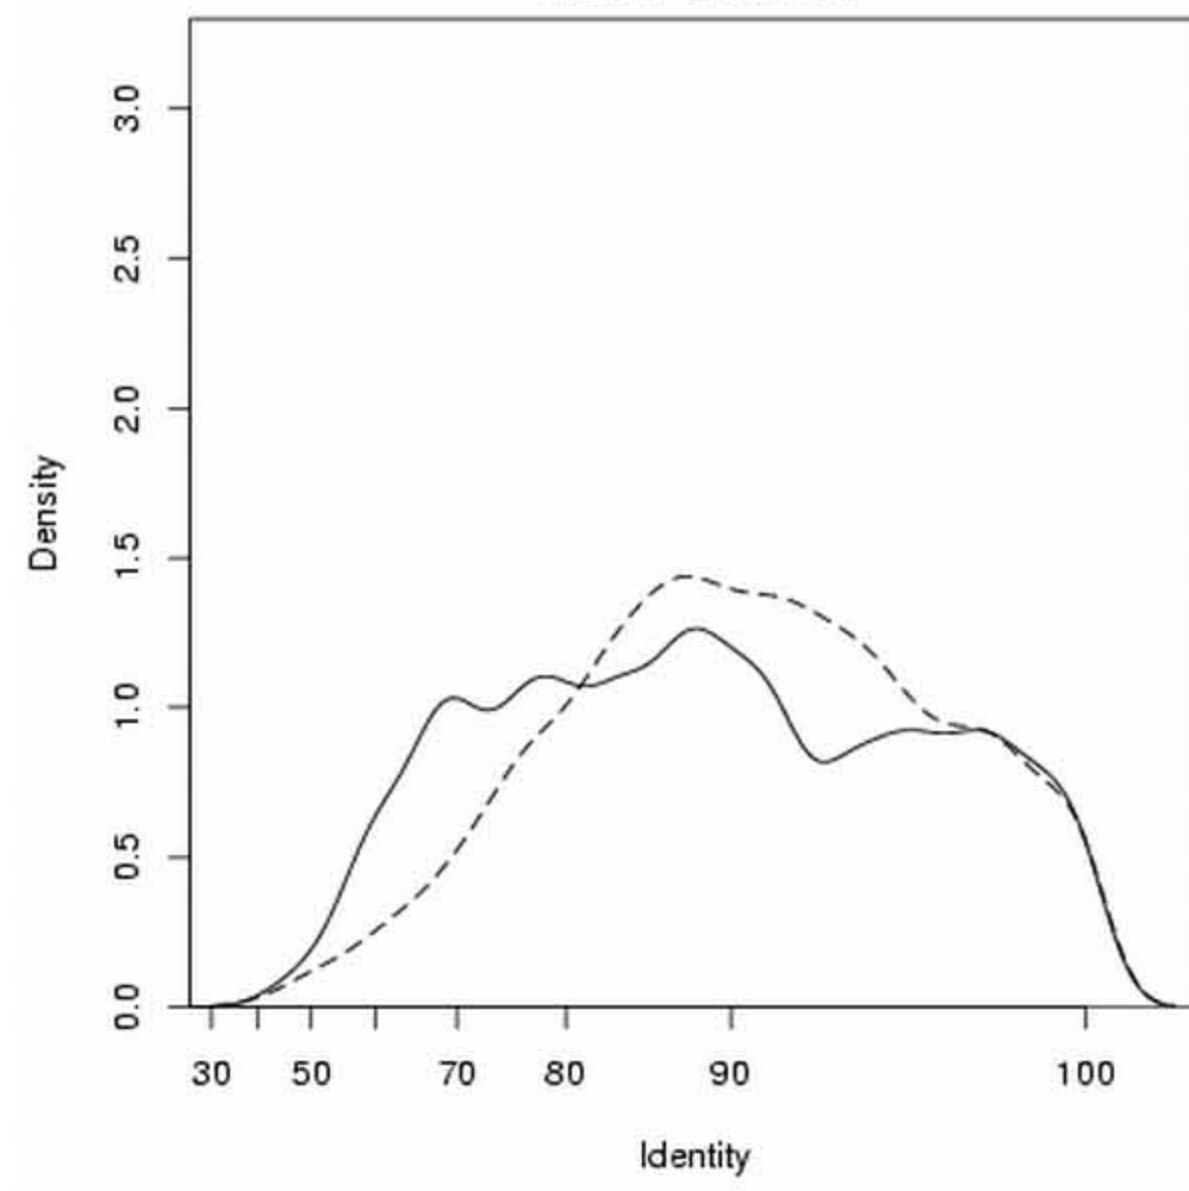

**carboxylic acid metabolism**  
N = 225  
Low: P = 0.00253

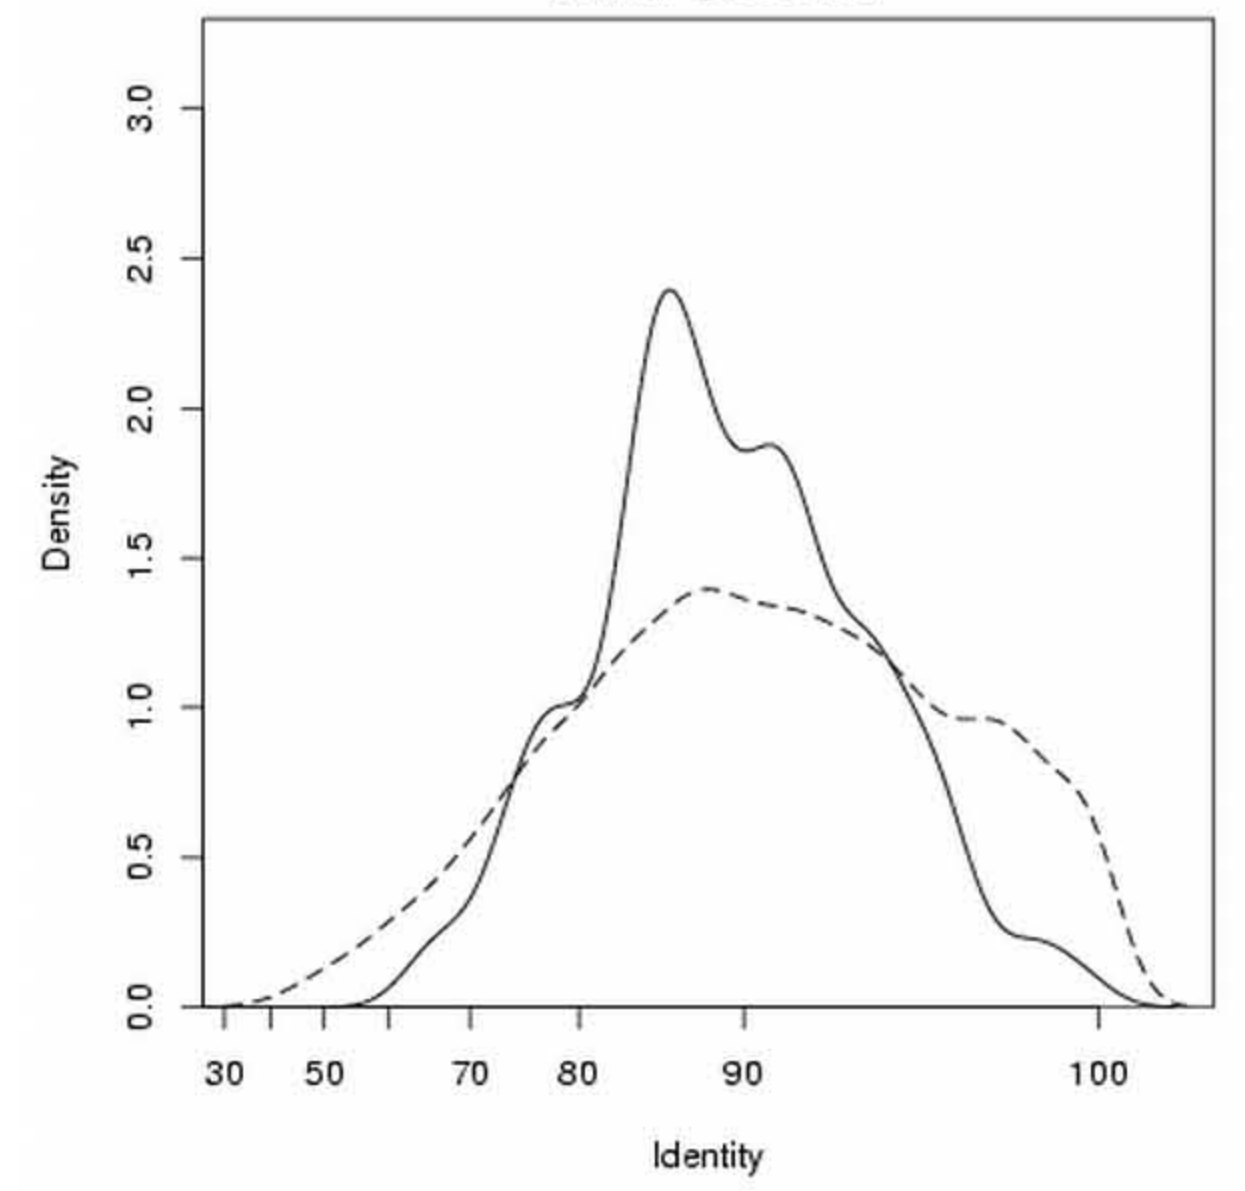

**response to abiotic stimulus**  
N = 148  
Low: P = 0.00444

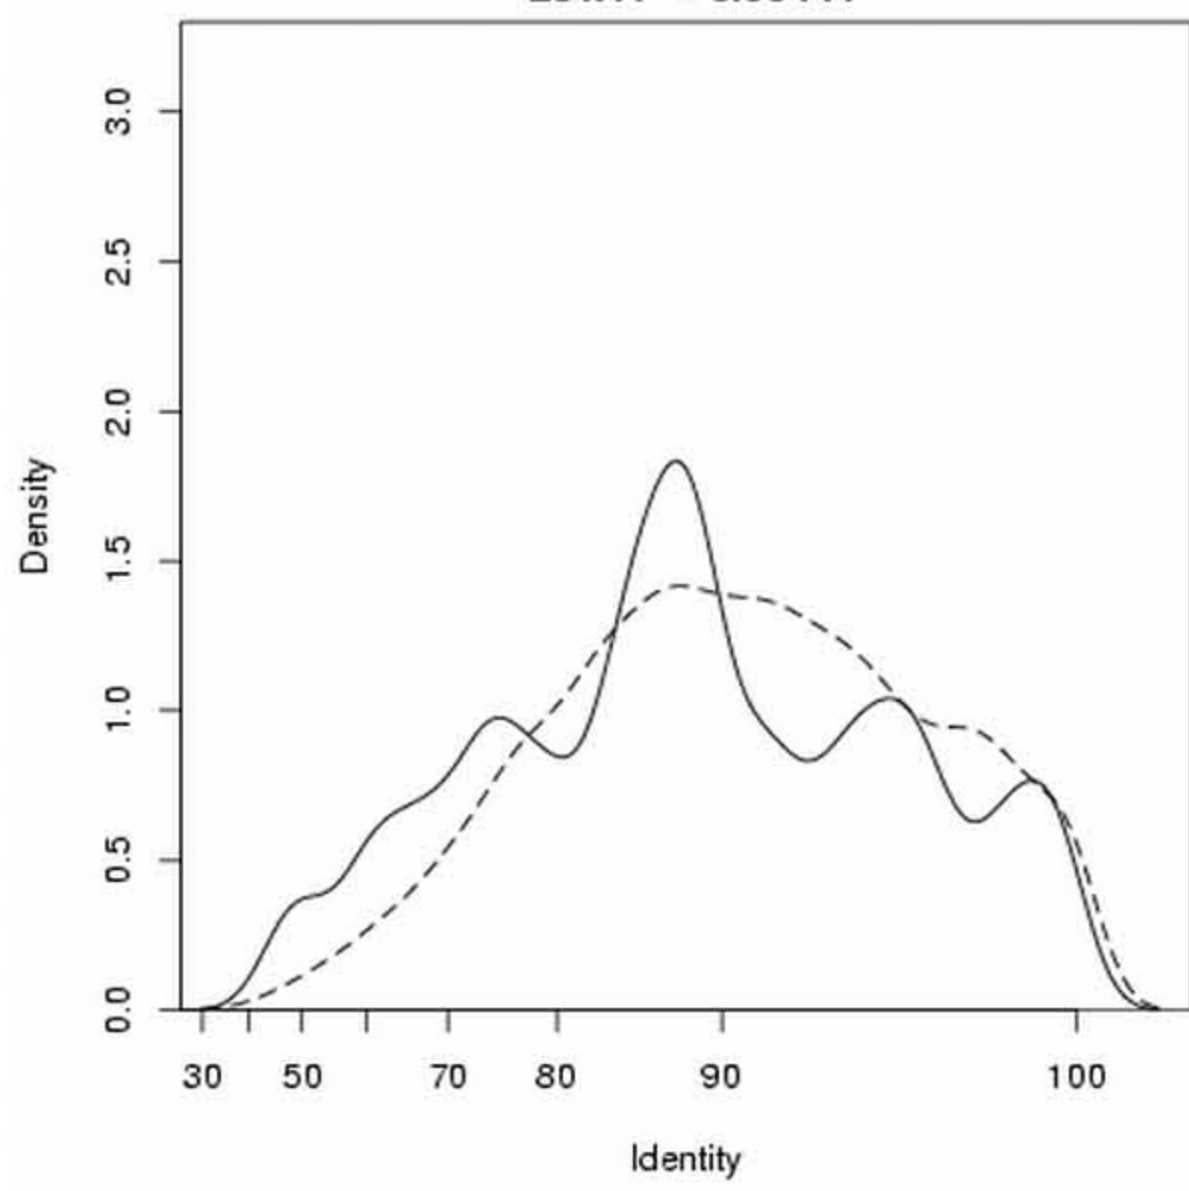

**positive regulation of biological process**  
N = 275  
Low: P = 0.0046

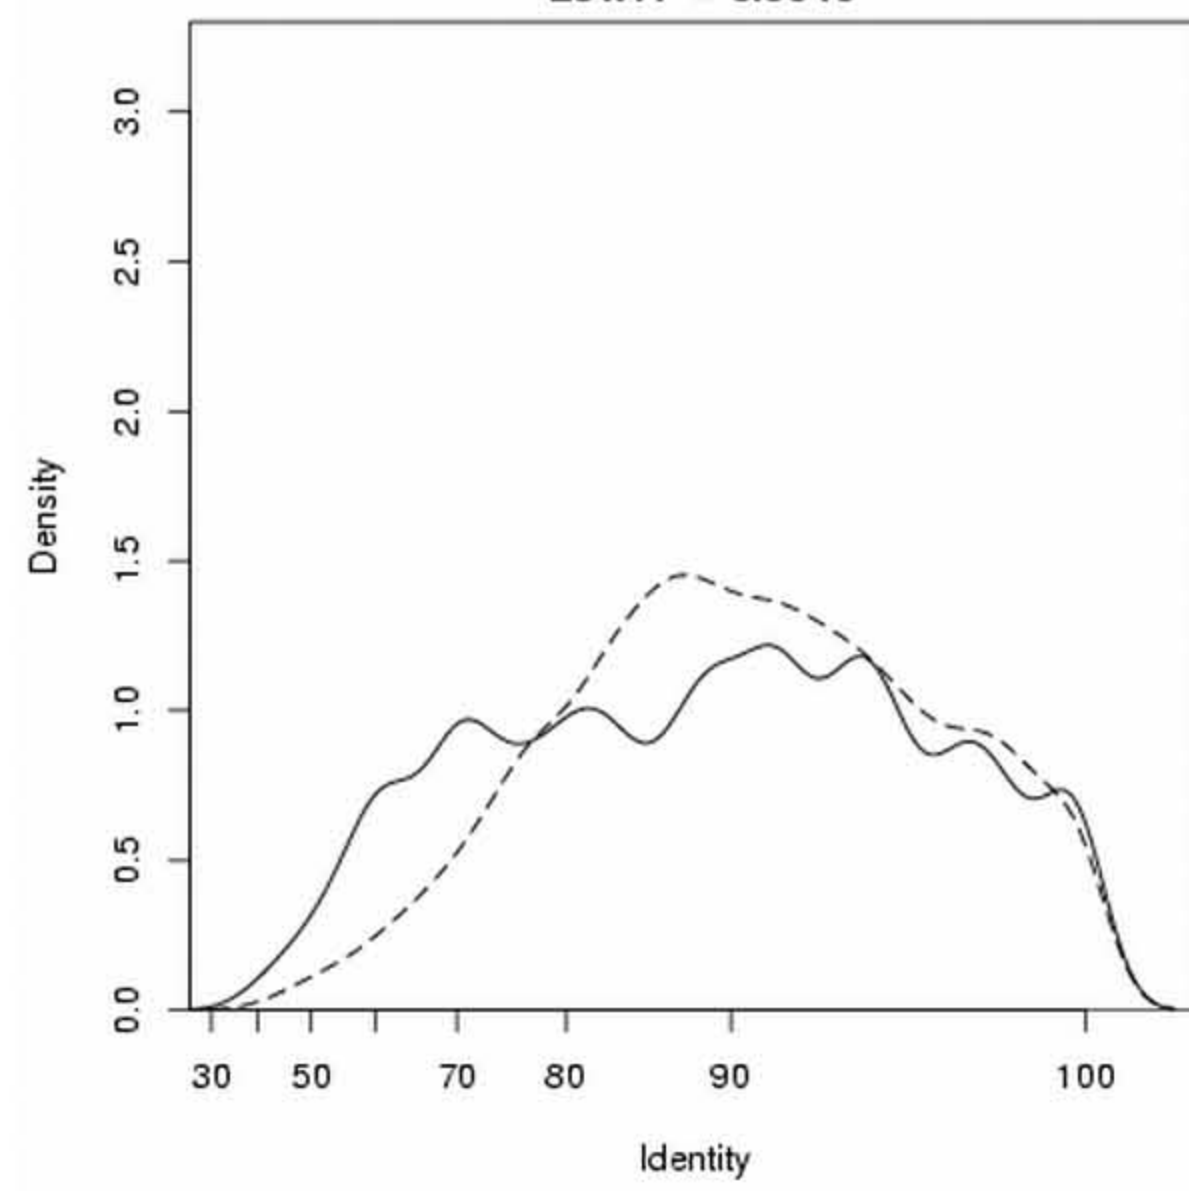

**response to chemical stimulus**  
N = 129  
Low: P = 0.00463

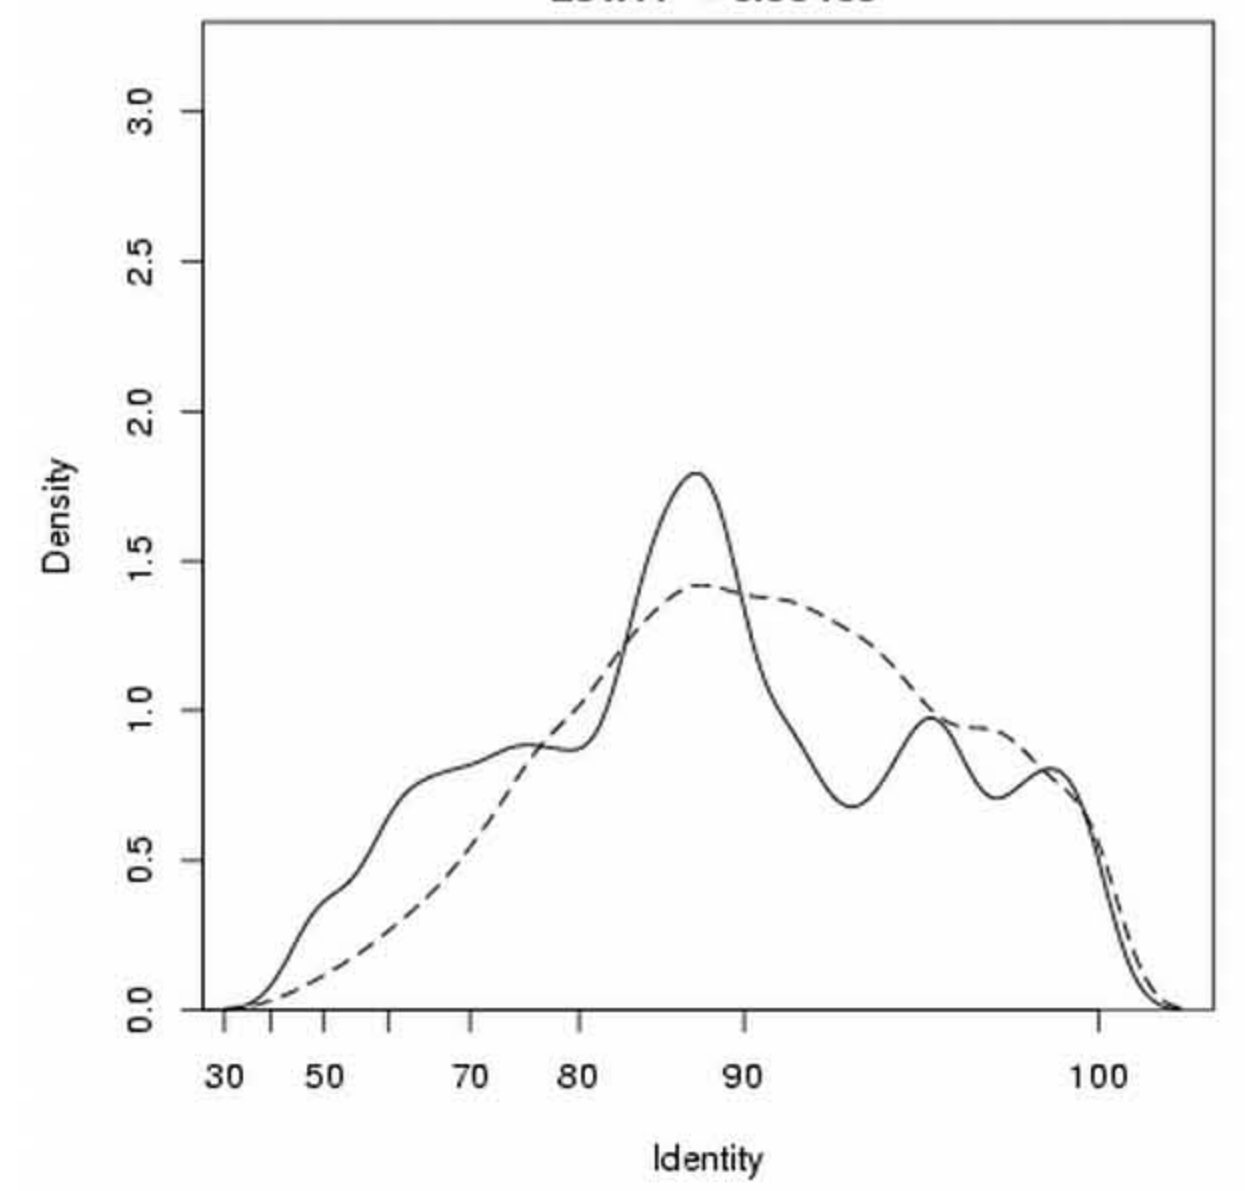

**lipid biosynthesis**  
N = 101  
Low: P = 0.00558

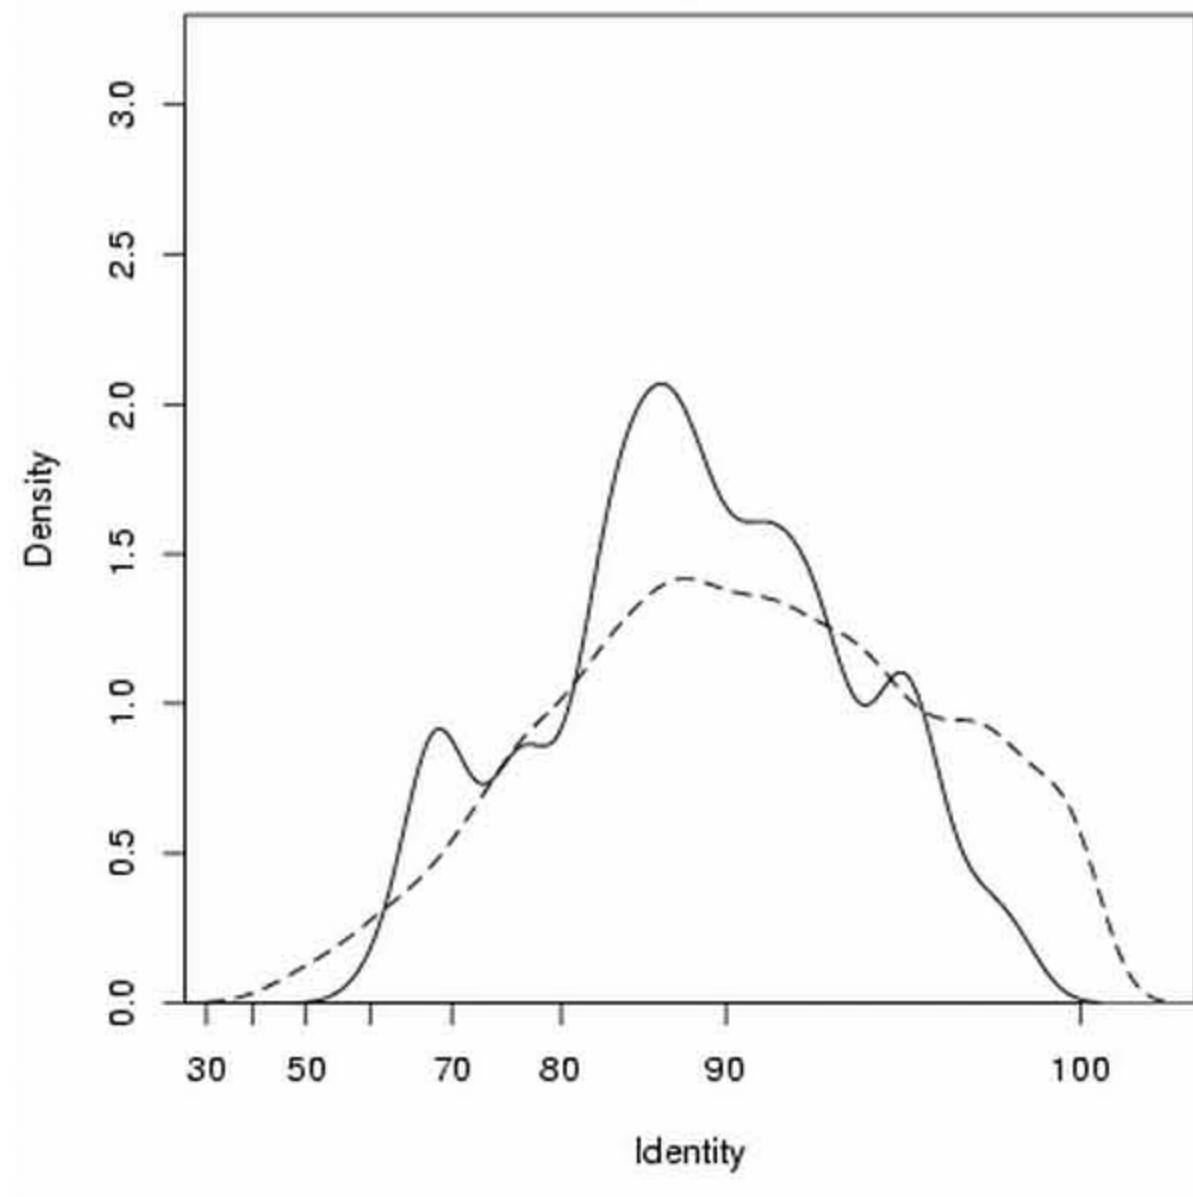

**cell-cell signaling**  
N = 176  
Low: P = 0.00602

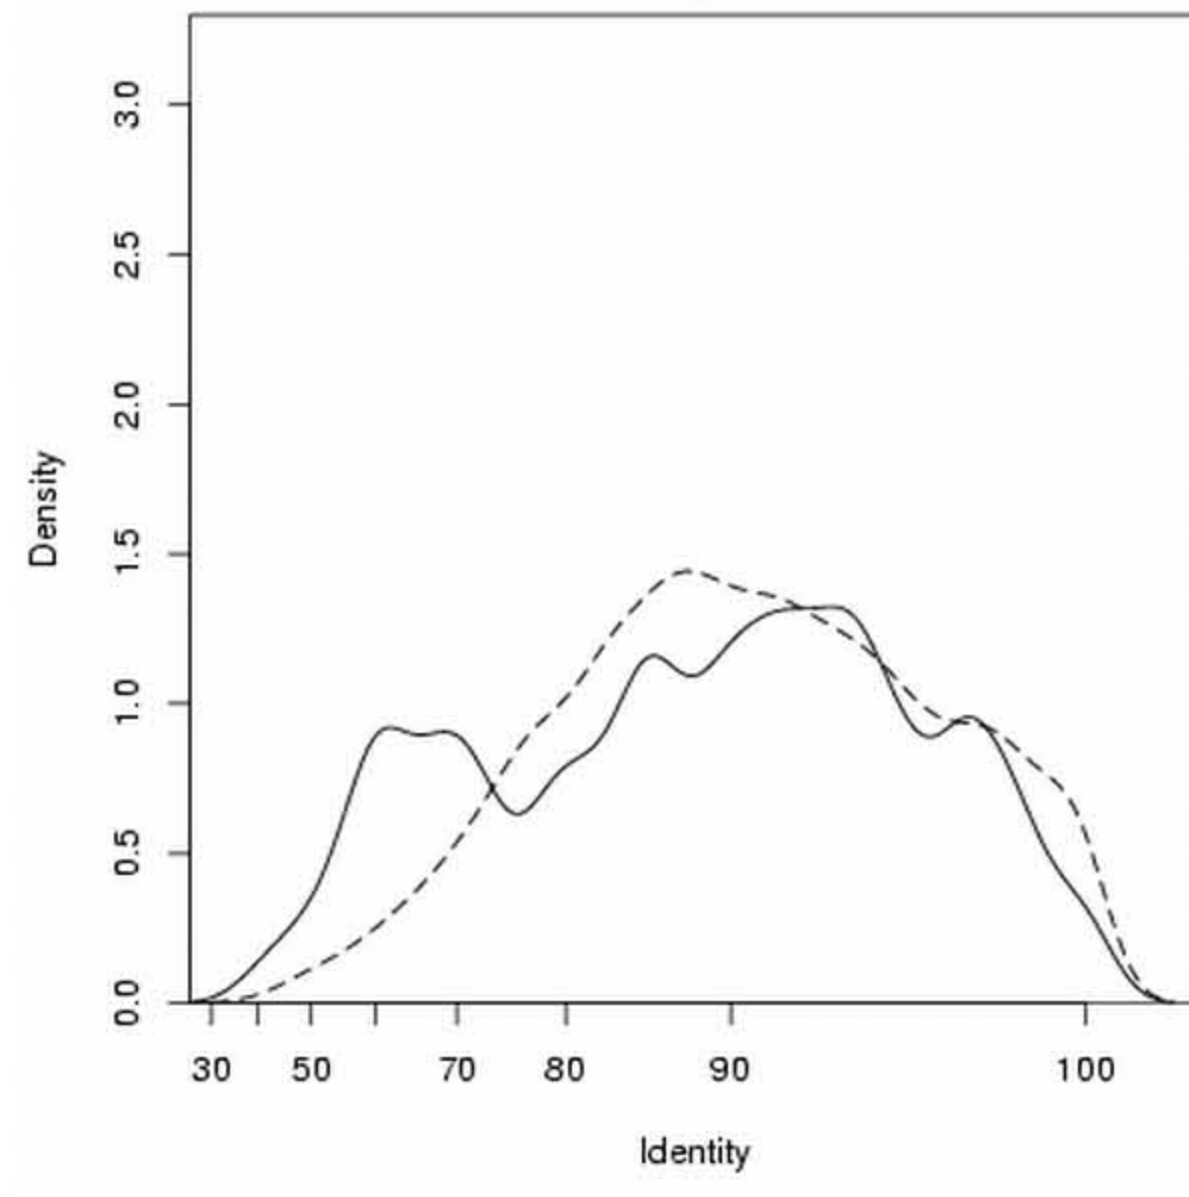

**sensory perception**  
N = 111  
Low: P = 0.00804

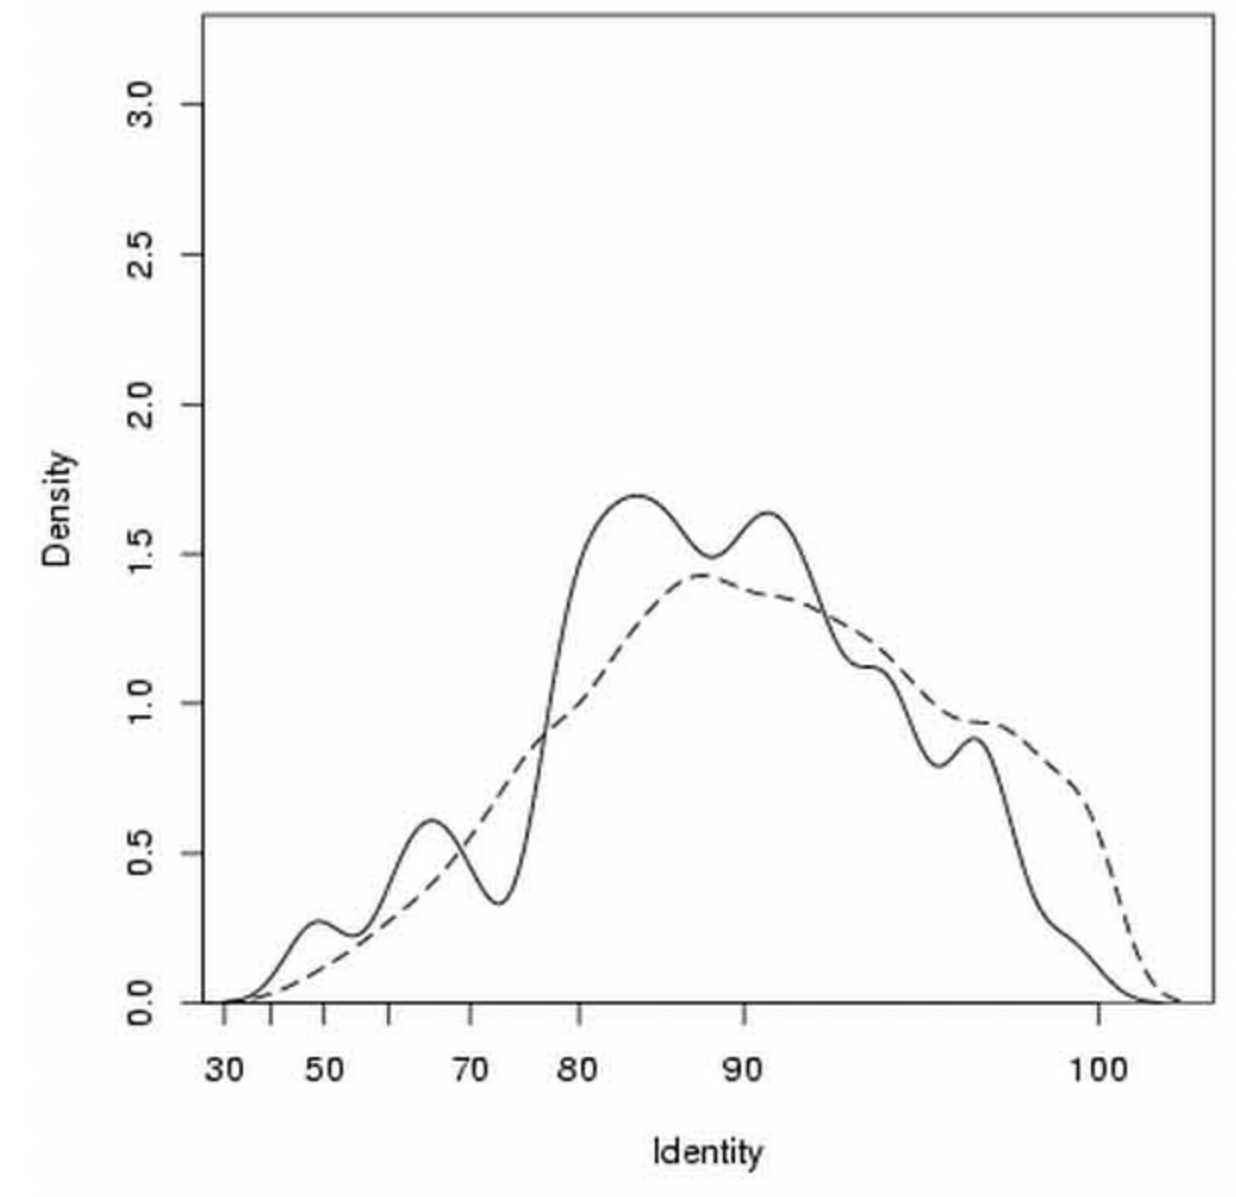

Supplement: 1471-2164-9-152-S6.pdf [file 1471-2164-9-152-S6.pdf]
