# Supplementary material for: Weak correlation between sequence conservation in promoter regions and in protein-coding regions of human-mouse orthologous gene pairs
Source: PubMed Central journal article supplement (PMC2335122; doi:10.1186/1471-2164-9-152), 2008-04-02
Supplement: 1471-2164-9-152-S2.pdf [file 1471-2164-9-152-S2.pdf]

## Additional file 2

| GO ID      | ontology           | GO term                                              |
|------------|--------------------|------------------------------------------------------|
| GO:0000902 | biological process | cellular morphogenesis                               |
| GO:0005975 | biological process | carbohydrate metabolism                              |
| GO:0006066 | biological process | alcohol metabolism                                   |
| GO:0006118 | biological process | electron transport                                   |
| GO:0006259 | biological process | DNA metabolism                                       |
| GO:0006350 | biological process | transcription                                        |
| GO:0006396 | biological process | RNA processing                                       |
| GO:0006412 | biological process | protein biosynthesis                                 |
| GO:0006457 | biological process | protein folding                                      |
| GO:0006461 | biological process | protein complex assembly                             |
| GO:0006468 | biological process | protein amino acid phosphorylation                   |
| GO:0006508 | biological process | proteolysis                                          |
| GO:0006512 | biological process | ubiquitin cycle                                      |
| GO:0006520 | biological process | amino acid metabolism                                |
| GO:0006629 | biological process | lipid metabolism                                     |
| GO:0006811 | biological process | ion transport                                        |
| GO:0006915 | biological process | apoptosis                                            |
| GO:0006928 | biological process | cell motility                                        |
| GO:0006950 | biological process | response to stress                                   |
| GO:0006955 | biological process | immune response                                      |
| GO:0007010 | biological process | cytoskeleton organization and biogenesis             |
| GO:0007049 | biological process | cell cycle                                           |
| GO:0007155 | biological process | cell adhesion                                        |
| GO:0007165 | biological process | signal transduction                                  |
| GO:0007166 | biological process | cell surface receptor linked signal transduction     |
| GO:0007186 | biological process | G-protein coupled receptor protein signaling pathway |
| GO:0007242 | biological process | intracellular signaling cascade                      |
| GO:0007243 | biological process | protein kinase cascade                               |
| GO:0007264 | biological process | small GTPase mediated signal transduction            |
| GO:0007267 | biological process | cell-cell signaling                                  |
| GO:0007275 | biological process | development                                          |
| GO:0007399 | biological process | nervous system development                           |
| GO:0007600 | biological process | sensory perception                                   |
| GO:0008283 | biological process | cell proliferation                                   |
| GO:0008610 | biological process | lipid biosynthesis                                   |
| GO:0009056 | biological process | catabolism                                           |
| GO:0009607 | biological process | response to biotic stimulus                          |
| GO:0009628 | biological process | response to abiotic stimulus                         |
| GO:0009653 | biological process | morphogenesis                                        |
| GO:0009892 | biological process | negative regulation of metabolism                    |
| GO:0016192 | biological process | vesicle-mediated transport                           |
| GO:0019752 | biological process | carboxylic acid metabolism                           |
| GO:0030154 | biological process | cell differentiation                                 |
| GO:0042221 | biological process | response to chemical stimulus                        |
| GO:0045045 | biological process | secretory pathway                                    |
| GO:0045449 | biological process | regulation of transcription                          |
| GO:0046907 | biological process | intracellular transport                              |
| GO:0048513 | biological process | organ development                                    |
| GO:0048518 | biological process | positive regulation of biological process            |
| GO:0048519 | biological process | negative regulation of biological process            |
| GO:0051186 | biological process | cofactor metabolism                                  |
| GO:0051276 | biological process | chromosome organization and biogenesis               |
| GO:0000151 | cellular component | ubiquitin ligase complex                             |
| GO:0005615 | cellular component | extracellular space                                  |
| GO:0005654 | cellular component | nucleoplasm                                          |
| GO:0005681 | cellular component | spliceosome complex                                  |
| GO:0005694 | cellular component | chromosome                                           |
| GO:0005730 | cellular component | nucleolus                                            |
| GO:0005739 | cellular component | mitochondrion                                        |
| GO:0005764 | cellular component | lysosome                                             |
| GO:0005768 | cellular component | endosome                                             |
| GO:0005777 | cellular component | peroxisome                                           |
| GO:0005783 | cellular component | endoplasmic reticulum                                |

|            |                    |                                     |
|------------|--------------------|-------------------------------------|
| GO:0005794 | cellular component | Golgi apparatus                     |
| GO:0005829 | cellular component | cytosol                             |
| GO:0005840 | cellular component | ribosome                            |
| GO:0005886 | cellular component | plasma membrane                     |
| GO:0012505 | cellular component | endomembrane system                 |
| GO:0015629 | cellular component | actin cytoskeleton                  |
| GO:0015630 | cellular component | microtubule cytoskeleton            |
| GO:0031012 | cellular component | extracellular matrix                |
| GO:0031090 | cellular component | organelle membrane                  |
| GO:0031967 | cellular component | organelle envelope                  |
| GO:0031982 | cellular component | vesicle                             |
| GO:0000287 | molecular function | magnesium ion binding               |
| GO:0003677 | molecular function | DNA binding                         |
| GO:0003700 | molecular function | transcription factor activity       |
| GO:0003723 | molecular function | RNA binding                         |
| GO:0003735 | molecular function | structural constituent of ribosome  |
| GO:0003924 | molecular function | GTPase activity                     |
| GO:0004518 | molecular function | nuclease activity                   |
| GO:0004672 | molecular function | protein kinase activity             |
| GO:0004842 | molecular function | ubiquitin-protein ligase activity   |
| GO:0004872 | molecular function | receptor activity                   |
| GO:0005102 | molecular function | receptor binding                    |
| GO:0005198 | molecular function | structural molecule activity        |
| GO:0005216 | molecular function | ion channel activity                |
| GO:0005386 | molecular function | carrier activity                    |
| GO:0005506 | molecular function | iron ion binding                    |
| GO:0005509 | molecular function | calcium ion binding                 |
| GO:0005524 | molecular function | ATP binding                         |
| GO:0005525 | molecular function | GTP binding                         |
| GO:0008092 | molecular function | cytoskeletal protein binding        |
| GO:0008233 | molecular function | peptidase activity                  |
| GO:0008270 | molecular function | zinc ion binding                    |
| GO:0015075 | molecular function | ion transporter activity            |
| GO:0016491 | molecular function | oxidoreductase activity             |
| GO:0016887 | molecular function | ATPase activity                     |
| GO:0030234 | molecular function | enzyme regulator activity           |
| GO:0042578 | molecular function | phosphoric ester hydrolase activity |

---
