# Supplementary material for: Weak correlation between sequence conservation in promoter regions and in protein-coding regions of human-mouse orthologous gene pairs
Source: PubMed Central journal article supplement (PMC2335122; doi:10.1186/1471-2164-9-152), 2008-04-02
Supplement: 1471-2164-9-152-S3.pdf [file 1471-2164-9-152-S3.pdf]

## Additional file 3

| GO term                                                | number of samples | number of control | P-value for high conservation | P-value for low conservation |
|--------------------------------------------------------|-------------------|-------------------|-------------------------------|------------------------------|
| P:development                                          | 649               | 4136              | 0                             | 1.000000                     |
| P:regulation of transcription                          | 602               | 4183              | 1.67E-15                      | 1.000000                     |
| F:transcription factor activity                        | 263               | 4760              | 3.44E-15                      | 1.000000                     |
| P:transcription                                        | 640               | 4145              | 4.11E-14                      | 1.000000                     |
| P:nervous system development                           | 154               | 4631              | 1.99E-10                      | 1.000000                     |
| P:organ development                                    | 213               | 4572              | 2.30E-10                      | 1.000000                     |
| P:signal transduction                                  | 994               | 3791              | 5.19E-10                      | 1.000000                     |
| F:DNA binding                                          | 628               | 4395              | 3.19E-08                      | 1.000000                     |
| P:morphogenesis                                        | 212               | 4573              | 9.78E-08                      | 1.000000                     |
| P:cell surface receptor linked signal transduction     | 363               | 4422              | 2.23E-06                      | 0.999998                     |
| P:negative regulation of metabolism                    | 107               | 4678              | 1.02E-05                      | 0.999990                     |
| F:receptor binding                                     | 221               | 4802              | 1.90E-05                      | 0.999981                     |
| P:cell-cell signaling                                  | 176               | 4609              | 2.27E-05                      | 0.999977                     |
| F:cytoskeletal protein binding                         | 137               | 4886              | 4.97E-05                      | 0.999950                     |
| P:negative regulation of biological process            | 327               | 4458              | 6.87E-05                      | 0.999931                     |
| F:ion channel activity                                 | 98                | 4925              | 9.87E-05                      | 0.999901                     |
| C:extracellular matrix                                 | 111               | 4401              | 0.000119                      | 0.999881                     |
| C:actin cytoskeleton                                   | 85                | 4427              | 0.000164                      | 0.999837                     |
| P:cell differentiation                                 | 173               | 4612              | 0.000179                      | 0.999821                     |
| P:cell adhesion                                        | 242               | 4543              | 0.000182                      | 0.999818                     |
| P:cellular morphogenesis                               | 111               | 4674              | 0.000607                      | 0.999393                     |
| F:ion transporter activity                             | 237               | 4786              | 0.001493                      | 0.998508                     |
| P:protein amino acid phosphorylation                   | 213               | 4572              | 0.001593                      | 0.998407                     |
| P:ion transport                                        | 239               | 4546              | 0.001825                      | 0.998176                     |
| F:protein kinase activity                              | 220               | 4803              | 0.002033                      | 0.997967                     |
| P:intracellular signaling cascade                      | 431               | 4354              | 0.006872                      | 0.993129                     |
| P:chromosome organization and biogenesis               | 105               | 4680              | 0.007832                      | 0.992170                     |
| C:plasma membrane                                      | 608               | 3904              | 0.008026                      | 0.991975                     |
| F:GTPase activity                                      | 88                | 4935              | 0.011437                      | 0.988566                     |
| P:cytoskeleton organization and biogenesis             | 155               | 4630              | 0.011868                      | 0.988133                     |
| P:small GTPase mediated signal transduction            | 126               | 4659              | 0.012373                      | 0.987629                     |
| P:cell proliferation                                   | 258               | 4527              | 0.016427                      | 0.983575                     |
| F:GTP binding                                          | 160               | 4863              | 0.026124                      | 0.973879                     |
| F:calcium ion binding                                  | 280               | 4743              | 0.058031                      | 0.941974                     |
| P:cell motility                                        | 105               | 4680              | 0.061020                      | 0.938989                     |
| F:receptor activity                                    | 391               | 4632              | 0.078737                      | 0.921269                     |
| F:structural molecule activity                         | 307               | 4716              | 0.079056                      | 0.920950                     |
| P:G-protein coupled receptor protein signaling pathway | 153               | 4632              | 0.108505                      | 0.891506                     |
| F:phosphoric ester hydrolase activity                  | 113               | 4910              | 0.138352                      | 0.861663                     |
| F:enzyme regulator activity                            | 238               | 4785              | 0.148055                      | 0.851956                     |
| P:protein complex assembly                             | 122               | 4663              | 0.154119                      | 0.845897                     |
| P:vesicle-mediated transport                           | 190               | 4595              | 0.166697                      | 0.833317                     |
| P:protein kinase cascade                               | 118               | 4667              | 0.173566                      | 0.826451                     |
| C:nucleoplasm                                          | 107               | 4405              | 0.198841                      | 0.801180                     |
| C:Golgi apparatus                                      | 216               | 4296              | 0.202850                      | 0.797165                     |
| F:zinc ion binding                                     | 600               | 4423              | 0.232496                      | 0.767514                     |
| F:carrier activity                                     | 149               | 4874              | 0.239577                      | 0.760441                     |
| P:intracellular transport                              | 350               | 4435              | 0.240786                      | 0.759226                     |
| P:sensory perception                                   | 111               | 4674              | 0.293922                      | 0.706102                     |
| P:cell cycle                                           | 340               | 4445              | 0.297867                      | 0.702148                     |
| F:RNA binding                                          | 290               | 4733              | 0.320681                      | 0.679334                     |
| P:positive regulation of biological process            | 275               | 4510              | 0.345462                      | 0.654555                     |
| F:ATP binding                                          | 520               | 4503              | 0.376693                      | 0.623319                     |
| F:ubiquitin-protein ligase activity                    | 144               | 4879              | 0.426143                      | 0.573880                     |
| P:DNA metabolism                                       | 266               | 4519              | 0.454829                      | 0.545189                     |
| P:apoptosis                                            | 244               | 4541              | 0.532993                      | 0.467026                     |
| C:microtubule cytoskeleton                             | 115               | 4397              | 0.540403                      | 0.459626                     |
| P:protein folding                                      | 121               | 4664              | 0.586660                      | 0.413366                     |
| C:endoplasmic reticulum                                | 268               | 4244              | 0.591106                      | 0.408913                     |
| C:extracellular space                                  | 179               | 4333              | 0.608820                      | 0.391202                     |
| P:response to chemical stimulus                        | 129               | 4656              | 0.645196                      | 0.354828                     |

|                                      |     |      |          |          |
|--------------------------------------|-----|------|----------|----------|
| F:ATPase activity                    | 130 | 4893 | 0.647215 | 0.352808 |
| P:ubiquitin cycle                    | 235 | 4550 | 0.654462 | 0.345556 |
| C:endomembrane system                | 163 | 4349 | 0.667170 | 0.332852 |
| C:chromosome                         | 108 | 4404 | 0.692915 | 0.307111 |
| C:organelle envelope                 | 148 | 4364 | 0.696927 | 0.303096 |
| P:response to abiotic stimulus       | 148 | 4637 | 0.720140 | 0.279881 |
| C:vesicle                            | 86  | 4426 | 0.734101 | 0.265927 |
| P:secretory pathway                  | 102 | 4683 | 0.777510 | 0.222512 |
| C:endosome                           | 33  | 4479 | 0.801091 | 0.198946 |
| C:ubiquitin ligase complex           | 122 | 4390 | 0.815112 | 0.184907 |
| C:organelle membrane                 | 242 | 4270 | 0.832397 | 0.167616 |
| P:cofactor metabolism                | 100 | 4685 | 0.901092 | 0.098920 |
| C:cytosol                            | 171 | 4341 | 0.924121 | 0.075887 |
| C:spliceosome complex                | 37  | 4475 | 0.931290 | 0.068727 |
| F:magnesium ion binding              | 135 | 4888 | 0.946019 | 0.053988 |
| P:alcohol metabolism                 | 133 | 4652 | 0.977205 | 0.022798 |
| P:lipid biosynthesis                 | 101 | 4684 | 0.978371 | 0.021633 |
| P:RNA processing                     | 198 | 4587 | 0.979718 | 0.020285 |
| P:response to stress                 | 446 | 4339 | 0.984169 | 0.015833 |
| P:proteolysis                        | 259 | 4526 | 0.993157 | 0.006844 |
| F:peptidase activity                 | 227 | 4796 | 0.994409 | 0.005592 |
| F:iron ion binding                   | 111 | 4912 | 0.994501 | 0.005500 |
| P:immune response                    | 270 | 4515 | 0.994563 | 0.005437 |
| C:nucleolus                          | 63  | 4449 | 0.995546 | 0.004455 |
| P:response to biotic stimulus        | 318 | 4467 | 0.999107 | 0.000893 |
| F:nuclease activity                  | 60  | 4963 | 0.999228 | 0.000772 |
| P:protein biosynthesis               | 283 | 4502 | 0.999370 | 0.000630 |
| C:peroxisome                         | 49  | 4463 | 0.999377 | 0.000623 |
| P:carbohydrate metabolism            | 220 | 4565 | 0.999722 | 0.000278 |
| P:catabolism                         | 260 | 4525 | 0.999749 | 0.000251 |
| P:electron transport                 | 151 | 4634 | 0.999764 | 0.000236 |
| P:amino acid metabolism              | 112 | 4673 | 0.999898 | 0.000102 |
| F:structural constituent of ribosome | 130 | 4893 | 0.999994 | 5.76E-06 |
| P:carboxylic acid metabolism         | 225 | 4560 | 0.999996 | 4.43E-06 |
| P:lipid metabolism                   | 260 | 4525 | 0.999999 | 1.04E-06 |
| C:ribosome                           | 114 | 4398 | 0.999999 | 7.54E-07 |
| C:lysosome                           | 77  | 4435 | 1.000000 | 9.94E-08 |
| F:oxidoreductase activity            | 309 | 4714 | 1.000000 | 2.07E-08 |
| C:mitochondrion                      | 398 | 4114 | 1.000000 | 5.31E-09 |
