# Supplementary material for: Weak correlation between sequence conservation in promoter regions and in protein-coding regions of human-mouse orthologous gene pairs
Source: PubMed Central journal article supplement (PMC2335122; doi:10.1186/1471-2164-9-152), 2008-04-02
Supplement: 1471-2164-9-152-S5.pdf [file 1471-2164-9-152-S5.pdf]

## Additional file 5

| GO term                                     | number of samples | number of control | P-value for high conservation | P-value for low conservation |
|---------------------------------------------|-------------------|-------------------|-------------------------------|------------------------------|
| F:GTPase activity                           | 88                | 4935              | 0                             | 1.000000                     |
| F:GTP binding                               | 160               | 4863              | 0                             | 1.000000                     |
| P:intracellular transport                   | 350               | 4435              | 0                             | 1.000000                     |
| P:small GTPase mediated signal transduction | 126               | 4659              | 1.11E-16                      | 1.000000                     |
| F:RNA binding                               | 290               | 4733              | 1.33E-15                      | 1.000000                     |
| C:cytosol                                   | 171               | 4341              | 3.70E-11                      | 1.000000                     |
| P:RNA processing                            | 198               | 4587              | 3.25E-10                      | 1.000000                     |
| C:Golgi apparatus                           | 216               | 4296              | 5.63E-10                      | 1.000000                     |
| P:intracellular signaling cascade           | 431               | 4354              | 2.57E-09                      | 1.000000                     |
| C:spliceosome complex                       | 37                | 4475              | 6.46E-09                      | 1.000000                     |
| P:transcription                             | 640               | 4145              | 1.76E-08                      | 1.000000                     |
| P:regulation of transcription               | 602               | 4183              | 2.02E-08                      | 1.000000                     |
| F:ATP binding                               | 520               | 4503              | 2.85E-08                      | 1.000000                     |
| C:actin cytoskeleton                        | 85                | 4427              | 5.37E-08                      | 1.000000                     |
| P:vesicle-mediated transport                | 190               | 4595              | 7.02E-08                      | 1.000000                     |
| P:cytoskeleton organization and biogenesis  | 155               | 4630              | 9.26E-08                      | 1.000000                     |
| F:cytoskeletal protein binding              | 137               | 4886              | 1.44E-07                      | 1.000000                     |
| P:secretory pathway                         | 102               | 4683              | 7.91E-07                      | 0.999999                     |
| C:nucleoplasm                               | 107               | 4405              | 1.22E-06                      | 0.999999                     |
| C:ribosome                                  | 114               | 4398              | 1.36E-06                      | 0.999999                     |
| P:protein biosynthesis                      | 283               | 4502              | 1.56E-06                      | 0.999998                     |
| P:ubiquitin cycle                           | 235               | 4550              | 2.86E-06                      | 0.999997                     |
| F:ion channel activity                      | 98                | 4925              | 7.08E-05                      | 0.999929                     |
| P:protein amino acid phosphorylation        | 213               | 4572              | 0.000101                      | 0.999899                     |
| F:ATPase activity                           | 130               | 4893              | 0.000143                      | 0.999857                     |
| C:endomembrane system                       | 163               | 4349              | 0.000154                      | 0.999846                     |
| F:protein kinase activity                   | 220               | 4803              | 0.000178                      | 0.999822                     |
| P:nervous system development                | 154               | 4631              | 0.000293                      | 0.999707                     |
| F:transcription factor activity             | 263               | 4760              | 0.000465                      | 0.999535                     |
| C:microtubule cytoskeleton                  | 115               | 4397              | 0.000595                      | 0.999405                     |
| C:vesicle                                   | 86                | 4426              | 0.000732                      | 0.999268                     |
| F:structural molecule activity              | 307               | 4716              | 0.000801                      | 0.999199                     |
| F:structural constituent of ribosome        | 130               | 4893              | 0.000843                      | 0.999157                     |
| F:ubiquitin-protein ligase activity         | 144               | 4879              | 0.001969                      | 0.998031                     |
| C:organelle membrane                        | 242               | 4270              | 0.004122                      | 0.995878                     |
| P:cell cycle                                | 340               | 4445              | 0.006445                      | 0.993555                     |
| F:ion transporter activity                  | 237               | 4786              | 0.012295                      | 0.987707                     |
| P:ion transport                             | 239               | 4546              | 0.030566                      | 0.969438                     |
| P:protein folding                           | 121               | 4664              | 0.034044                      | 0.965961                     |
| P:chromosome organization and biogenesis    | 105               | 4680              | 0.036151                      | 0.963855                     |
| P:negative regulation of metabolism         | 107               | 4678              | 0.036606                      | 0.963400                     |
| C:organelle envelope                        | 148               | 4364              | 0.041055                      | 0.958950                     |
| C:ubiquitin ligase complex                  | 122               | 4390              | 0.049298                      | 0.950710                     |
| C:nucleolus                                 | 63                | 4449              | 0.052885                      | 0.947125                     |
| P:signal transduction                       | 994               | 3791              | 0.059572                      | 0.940431                     |
| P:development                               | 649               | 4136              | 0.068289                      | 0.931715                     |
| C:endosome                                  | 33                | 4479              | 0.072924                      | 0.927094                     |
| P:cellular morphogenesis                    | 111               | 4674              | 0.096274                      | 0.903738                     |
| F:DNA binding                               | 628               | 4395              | 0.127413                      | 0.872593                     |
| F:magnesium ion binding                     | 135               | 4888              | 0.178351                      | 0.821664                     |
| C:endoplasmic reticulum                     | 268               | 4244              | 0.191479                      | 0.808535                     |
| P:protein complex assembly                  | 122               | 4663              | 0.220653                      | 0.779367                     |
| F:carrier activity                          | 149               | 4874              | 0.234886                      | 0.765132                     |
| P:cofactor metabolism                       | 100               | 4685              | 0.290470                      | 0.709555                     |
| F:phosphoric ester hydrolase activity       | 113               | 4910              | 0.322610                      | 0.677414                     |
| P:catabolism                                | 260               | 4525              | 0.424096                      | 0.575922                     |
| C:chromosome                                | 108               | 4404              | 0.488428                      | 0.511602                     |
| P:alcohol metabolism                        | 133               | 4652              | 0.577437                      | 0.422588                     |
| P:protein kinase cascade                    | 118               | 4667              | 0.594004                      | 0.406023                     |
| P:cell differentiation                      | 173               | 4612              | 0.687263                      | 0.312757                     |
| F:calcium ion binding                       | 280               | 4743              | 0.760671                      | 0.239342                     |

|                                                        |     |      |          |          |
|--------------------------------------------------------|-----|------|----------|----------|
| P:amino acid metabolism                                | 112 | 4673 | 0.782782 | 0.217238 |
| P:organ development                                    | 213 | 4572 | 0.818392 | 0.181621 |
| P:morphogenesis                                        | 212 | 4573 | 0.820673 | 0.179340 |
| P:carbohydrate metabolism                              | 220 | 4565 | 0.835908 | 0.164104 |
| P:G-protein coupled receptor protein signaling pathway | 153 | 4632 | 0.846529 | 0.153485 |
| F:zinc ion binding                                     | 600 | 4423 | 0.849586 | 0.150421 |
| P:negative regulation of biological process            | 327 | 4458 | 0.883863 | 0.116146 |
| P:cell surface receptor linked signal transduction     | 363 | 4422 | 0.916573 | 0.083433 |
| P:DNA metabolism                                       | 266 | 4519 | 0.922990 | 0.077016 |
| P:cell motility                                        | 105 | 4680 | 0.951250 | 0.048757 |
| F:iron ion binding                                     | 111 | 4912 | 0.978445 | 0.021559 |
| F:enzyme regulator activity                            | 238 | 4785 | 0.985550 | 0.014452 |
| P:sensory perception                                   | 111 | 4674 | 0.991960 | 0.008042 |
| P:cell-cell signaling                                  | 176 | 4609 | 0.993980 | 0.006021 |
| P:lipid biosynthesis                                   | 101 | 4684 | 0.994426 | 0.005576 |
| P:response to chemical stimulus                        | 129 | 4656 | 0.995375 | 0.004626 |
| P:positive regulation of biological process            | 275 | 4510 | 0.995402 | 0.004599 |
| P:response to abiotic stimulus                         | 148 | 4637 | 0.995557 | 0.004444 |
| P:carboxylic acid metabolism                           | 225 | 4560 | 0.997474 | 0.002527 |
| P:apoptosis                                            | 244 | 4541 | 0.998627 | 0.001373 |
| C:plasma membrane                                      | 608 | 3904 | 0.999709 | 0.000291 |
| F:nuclease activity                                    | 60  | 4963 | 0.999915 | 8.50E-05 |
| C:peroxisome                                           | 49  | 4463 | 0.999920 | 8.02E-05 |
| C:extracellular matrix                                 | 111 | 4401 | 0.999945 | 5.52E-05 |
| P:proteolysis                                          | 259 | 4526 | 0.999955 | 4.53E-05 |
| C:mitochondrion                                        | 398 | 4114 | 0.999970 | 3.00E-05 |
| P:cell adhesion                                        | 242 | 4543 | 0.999998 | 2.16E-06 |
| P:cell proliferation                                   | 258 | 4527 | 0.999998 | 1.65E-06 |
| F:peptidase activity                                   | 227 | 4796 | 0.999999 | 6.15E-07 |
| C:lysosome                                             | 77  | 4435 | 1.000000 | 6.38E-08 |
| P:electron transport                                   | 151 | 4634 | 1.000000 | 7.64E-10 |
| P:lipid metabolism                                     | 260 | 4525 | 1.000000 | 5.95E-11 |
| F:receptor binding                                     | 221 | 4802 | 1.000000 | 2.15E-11 |
| F:receptor activity                                    | 391 | 4632 | 1.000000 | 1.11E-11 |
| F:oxidoreductase activity                              | 309 | 4714 | 1.000000 | 2.35E-12 |
| P:response to stress                                   | 446 | 4339 | 1.000000 | 5.05E-26 |
| C:extracellular space                                  | 179 | 4333 | 1.000000 | 3.49E-37 |
| P:immune response                                      | 270 | 4515 | 1.000000 | 1.16E-44 |
| P:response to biotic stimulus                          | 318 | 4467 | 1.000000 | 4.08E-49 |
