# Supplementary material for: Weak correlation between sequence conservation in promoter regions and in protein-coding regions of human-mouse orthologous gene pairs
Source: PubMed Central journal article supplement (PMC2335122; doi:10.1186/1471-2164-9-152), 2008-04-02

Additional file 7

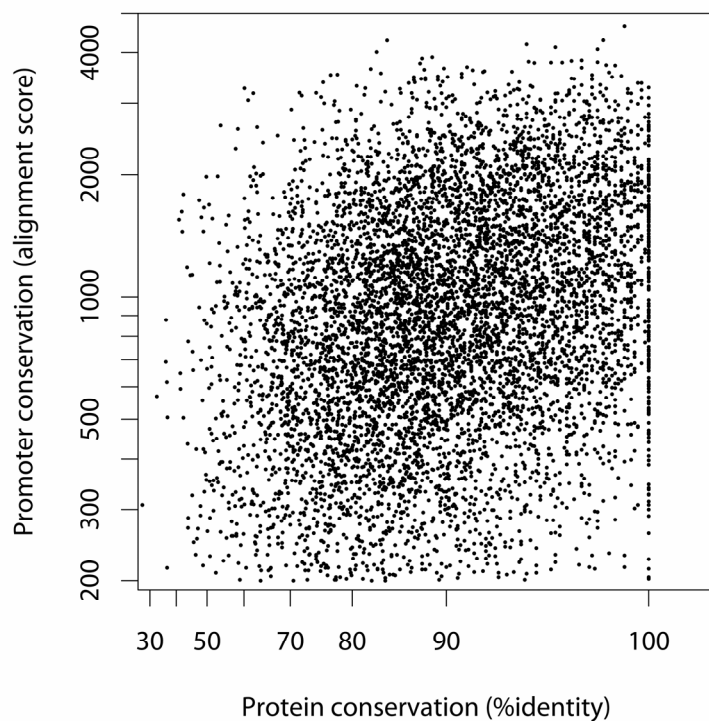

Supplement: 1471-2164-9-152-S7.pdf [file 1471-2164-9-152-S7.pdf]
