# Supplementary material for: Weak correlation between sequence conservation in promoter regions and in protein-coding regions of human-mouse orthologous gene pairs
Source: PubMed Central journal article supplement (PMC2335122; doi:10.1186/1471-2164-9-152), 2008-04-02
Supplement: 1471-2164-9-152-S9.pdf [file 1471-2164-9-152-S9.pdf]

Additional file 9

| %identity | RefSeq annotation                                                                                                |
|-----------|------------------------------------------------------------------------------------------------------------------|
| 100.0     | ribosomal protein L11                                                                                            |
| 100.0     | ribosomal protein L15                                                                                            |
| 100.0     | ribosomal protein L23                                                                                            |
| 100.0     | ribosomal protein L23a                                                                                           |
| 100.0     | ribosomal protein L24                                                                                            |
| 100.0     | ribosomal protein L26                                                                                            |
| 100.0     | ribosomal protein L27                                                                                            |
| 100.0     | ribosomal protein L30                                                                                            |
| 100.0     | ribosomal protein L31                                                                                            |
| 100.0     | ribosomal protein L36a                                                                                           |
| 100.0     | ribosomal protein L37                                                                                            |
| 100.0     | ribosomal protein L39                                                                                            |
| 100.0     | ribosomal protein L8                                                                                             |
| 100.0     | ribosomal protein S11                                                                                            |
| 100.0     | ribosomal protein S13                                                                                            |
| 100.0     | ribosomal protein S14                                                                                            |
| 100.0     | ribosomal protein S15                                                                                            |
| 100.0     | ribosomal protein S15a                                                                                           |
| 100.0     | ribosomal protein S18                                                                                            |
| 100.0     | ribosomal protein S20                                                                                            |
| 100.0     | ribosomal protein S23                                                                                            |
| 100.0     | ribosomal protein S27 (metallopanstimulin 1)                                                                     |
| 100.0     | ribosomal protein S29                                                                                            |
| 100.0     | ribosomal protein S4, X-linked                                                                                   |
| 100.0     | ribosomal protein S7                                                                                             |
| 99.6      | eukaryotic translation initiation factor 2, subunit 3 gamma, 52kDa                                               |
| 99.6      | ribosomal protein S3                                                                                             |
| 99.5      | ribosomal protein L10                                                                                            |
| 99.5      | ribosomal protein L10a                                                                                           |
| 99.5      | ribosomal protein L19                                                                                            |
| 99.4      | ribosomal protein L21                                                                                            |
| 99.4      | ribosomal protein S27a                                                                                           |
| 99.3      | ribosomal protein S19                                                                                            |
| 99.2      | ribosomal protein L22                                                                                            |
| 99.1      | ribosomal protein L35a                                                                                           |
| 99.0      | ribosomal protein L9                                                                                             |
| 99.0      | ribosomal protein SA                                                                                             |
| 98.8      | chromosome 15 open reading frame 15                                                                              |
| 98.8      | ribosomal protein S10                                                                                            |
| 98.6      | ribosomal protein L38                                                                                            |
| 98.6      | ribosomal protein S2                                                                                             |
| 98.5      | ribosomal protein L28                                                                                            |
| 98.5      | ribosomal protein S5                                                                                             |
| 98.4      | ribosomal protein L35                                                                                            |
| 98.3      | ribosomal protein L3                                                                                             |
| 98.3      | ribosomal protein L5                                                                                             |
| 97.9      | ribosomal protein S16                                                                                            |
| 97.7      | Finkel-Biskis-Reilly murine sarcoma virus (FBR-MuSV) ubiquitously expressed (fox derived); ribosomal protein S30 |
| 97.5      | dynamin 3                                                                                                        |
| 97.5      | ribosomal protein, large, P0                                                                                     |
| 97.4      | ribosomal protein, large, P1                                                                                     |
| 97.3      | ribosomal protein L27a                                                                                           |
| 96.6      | ADP-ribosylation factor-like 6 interacting protein 1                                                             |
| 95.9      | ribosomal protein L7                                                                                             |
| 95.6      | ribosomal protein L13a                                                                                           |
| 95.5      | eukaryotic translation initiation factor 2, subunit 2 beta, 38kDa                                                |
| 95.5      | signal recognition particle 68kDa                                                                                |
| 95.4      | splicing factor 1                                                                                                |
| 95.2      | ribosomal protein L36                                                                                            |
| 95.2      | ribosomal protein S21                                                                                            |
| 94.3      | APEX nuclease (multifunctional DNA repair enzyme) 1                                                              |
| 94.1      | fragile X mental retardation 1                                                                                   |
| 92.8      | formin binding protein 1                                                                                         |

91.9 ribosomal protein L4  
91.1 mitochondrial ribosomal protein S16  
90.8 mitochondrial ribosomal protein S21  
90.5 mitochondrial ribosomal protein S25  
89.3 mitochondrial ribosomal protein L13  
89.2 intraflagellar transport 88 homolog (Chlamydomonas)  
88.9 mitochondrial ribosomal protein L39  
88.8 mitochondrial ribosomal protein L22  
88.6 ribosomal protein L6  
88.4 phytoceramidase, alkaline  
88.3 queuine tRNA-ribosyltransferase 1 (tRNA-guanine transglycosylase)  
87.7 megalencephalic leukoencephalopathy with subcortical cysts 1  
87.5 mitochondrial ribosomal protein L11  
87.0 mitochondrial ribosomal protein L24  
86.9 mitochondrial ribosomal protein S10  
86.7 mitochondrial ribosomal protein S14  
86.3 mitochondrial ribosomal protein S17  
85.6 mitochondrial ribosomal protein S6  
85.5 mitochondrial ribosomal protein S12  
85.1 mitochondrial ribosomal protein L17  
84.6 mitochondrial ribosomal protein L12  
84.3 mitochondrial ribosomal protein S36  
84.3 mitochondrial ribosomal protein S7  
83.8 mitochondrial ribosomal protein S24  
83.6 ribosomal protein L7-like 1  
83.5 mitochondrial ribosomal protein L30  
83.1 mitochondrial ribosomal protein L27  
83.1 mitochondrial ribosomal protein L49  
83.0 mitochondrial ribosomal protein L23  
82.7 mitochondrial ribosomal protein L9  
82.2 mitochondrial ribosomal protein L3  
82.1 mitochondrial ribosomal protein L21  
82.1 mitochondrial ribosomal protein S33  
81.1 mitochondrial ribosomal protein S18A  
80.1 ribosomal protein L29  
79.9 acyl-Coenzyme A binding domain containing 5  
79.9 mitochondrial ribosomal protein S5  
78.9 mitochondrial ribosomal protein S22  
78.2 mitochondrial ribosomal protein L1  
77.8 mitochondrial ribosomal protein S18B  
77.0 mitochondrial ribosomal protein L47  
77.0 mitochondrial ribosomal protein S9  
76.4 mitochondrial ribosomal protein L42  
75.0 mitochondrial ribosomal protein L34  
74.8 mitochondrial ribosomal protein L40  
73.9 mitochondrial ribosomal protein S30  
72.7 mitochondrial ribosomal protein S28  
72.2 mitochondrial ribosomal protein S11  
63.6 mitochondrial ribosomal protein S15  
59.2 mitochondrial ribosomal protein L36  
56.2 ribosomal L1 domain containing 1

---
