# Supplementary material for: Weak correlation between sequence conservation in promoter regions and in protein-coding regions of human-mouse orthologous gene pairs
Source: PubMed Central journal article supplement (PMC2335122; doi:10.1186/1471-2164-9-152), 2008-04-02
Supplement: 1471-2164-9-152-S10.pdf [file 1471-2164-9-152-S10.pdf]

---

| <b>Alignment score</b> | <b>Refseq annotation</b>                                                                                         |
|------------------------|------------------------------------------------------------------------------------------------------------------|
| 2455                   | mitochondrial ribosomal protein S18B                                                                             |
| 2419                   | ribosomal protein S29                                                                                            |
| 2242                   | mitochondrial ribosomal protein S12                                                                              |
| 2212                   | ribosomal protein L7                                                                                             |
| 1955                   | mitochondrial ribosomal protein L49                                                                              |
| 1954                   | ribosomal protein S18                                                                                            |
| 1841                   | ribosomal protein S19                                                                                            |
| 1835                   | splicing factor 1                                                                                                |
| 1615                   | mitochondrial ribosomal protein L40                                                                              |
| 1551                   | mitochondrial ribosomal protein L13                                                                              |
| 1468                   | mitochondrial ribosomal protein S11                                                                              |
| 1459                   | ribosomal protein L36a                                                                                           |
| 1403                   | eukaryotic translation initiation factor 2, subunit 2 beta, 38kDa                                                |
| 1268                   | ribosomal protein L4                                                                                             |
| 1242                   | megalencephalic leukoencephalopathy with subcortical cysts 1                                                     |
| 1202                   | ribosomal protein S27a                                                                                           |
| 1173                   | mitochondrial ribosomal protein L17                                                                              |
| 1142                   | mitochondrial ribosomal protein L11                                                                              |
| 1141                   | ribosomal protein L22                                                                                            |
| 1141                   | ribosomal protein S27 (metallopanstimulin 1)                                                                     |
| 1123                   | ribosomal protein L10                                                                                            |
| 1121                   | fragile X mental retardation 1                                                                                   |
| 1113                   | mitochondrial ribosomal protein S7                                                                               |
| 1074                   | Finkel-Biskis-Reilly murine sarcoma virus (FBR-MuSV) ubiquitously expressed (fox derived); ribosomal protein S30 |
| 1031                   | ribosomal protein S16                                                                                            |
| 1028                   | dynamamin 3                                                                                                      |
| 1017                   | signal recognition particle 68kDa                                                                                |
| 993                    | mitochondrial ribosomal protein S6                                                                               |
| 970                    | ribosomal protein L19                                                                                            |
| 945                    | ribosomal protein L13a                                                                                           |
| 927                    | mitochondrial ribosomal protein L27                                                                              |
| 902                    | ribosomal protein L27                                                                                            |
| 900                    | ribosomal protein, large, P1                                                                                     |
| 896                    | acyl-Coenzyme A binding domain containing 5                                                                      |
| 889                    | eukaryotic translation initiation factor 2, subunit 3 gamma, 52kDa                                               |
| 886                    | phytoceramidase, alkaline                                                                                        |
| 877                    | ribosomal protein L35a                                                                                           |
| 848                    | ribosomal protein S14                                                                                            |
| 846                    | ribosomal protein L30                                                                                            |
| 834                    | mitochondrial ribosomal protein S21                                                                              |
| 824                    | mitochondrial ribosomal protein L1                                                                               |
| 823                    | mitochondrial ribosomal protein L3                                                                               |
| 820                    | ribosomal protein S4, X-linked                                                                                   |
| 813                    | formin binding protein 1                                                                                         |
| 809                    | mitochondrial ribosomal protein L30                                                                              |
| 791                    | ADP-ribosylation factor-like 6 interacting protein 1                                                             |
| 787                    | ribosomal protein L15                                                                                            |
| 782                    | ribosomal protein L9                                                                                             |
| 774                    | queuine tRNA-ribosyltransferase 1 (tRNA-guanine transglycosylase)                                                |
| 742                    | ribosomal protein S23                                                                                            |
| 738                    | mitochondrial ribosomal protein L47                                                                              |
| 731                    | ribosomal protein S3                                                                                             |
| 726                    | ribosomal protein S2                                                                                             |
| 717                    | ribosomal protein L23a                                                                                           |
| 703                    | ribosomal protein L39                                                                                            |
| 702                    | ribosomal protein L5                                                                                             |
| 698                    | ribosomal protein L26                                                                                            |
| 694                    | mitochondrial ribosomal protein S36                                                                              |
| 686                    | ribosomal protein L11                                                                                            |
| 673                    | ribosomal protein L21                                                                                            |
| 672                    | mitochondrial ribosomal protein S18A                                                                             |
| 671                    | ribosomal protein S13                                                                                            |

669 ribosomal protein L29  
666 ribosomal protein S5  
657 ribosomal protein S7  
646 mitochondrial ribosomal protein L24  
643 mitochondrial ribosomal protein S30  
640 ribosomal protein L7-like 1  
631 ribosomal protein S20  
628 ribosomal protein L38  
626 ribosomal protein S10  
623 ribosomal protein L6  
618 ribosomal protein L37  
607 ribosomal protein L23  
593 mitochondrial ribosomal protein L42  
580 mitochondrial ribosomal protein S28  
573 mitochondrial ribosomal protein S15  
571 mitochondrial ribosomal protein L34  
550 mitochondrial ribosomal protein S33  
548 mitochondrial ribosomal protein S22  
545 ribosomal protein L24  
536 chromosome 15 open reading frame 15  
528 ribosomal protein L3  
524 ribosomal protein L31  
522 mitochondrial ribosomal protein S24  
516 ribosomal protein L28  
516 ribosomal protein L35  
514 mitochondrial ribosomal protein S10  
510 intraflagellar transport 88 homolog (Chlamydomonas)  
504 ribosomal protein, large, P0  
498 mitochondrial ribosomal protein S14  
491 mitochondrial ribosomal protein L23  
486 APEX nuclease (multifunctional DNA repair enzyme) 1  
481 ribosomal protein L27a  
475 mitochondrial ribosomal protein L9  
472 mitochondrial ribosomal protein L22  
465 ribosomal protein S15a  
448 mitochondrial ribosomal protein S9  
439 mitochondrial ribosomal protein L21  
421 ribosomal protein S15  
405 ribosomal protein SA  
398 ribosomal protein L10a  
356 mitochondrial ribosomal protein L12  
350 mitochondrial ribosomal protein S5  
314 ribosomal protein S11  
306 mitochondrial ribosomal protein S25  
302 ribosomal L1 domain containing 1  
300 ribosomal protein L36  
297 ribosomal protein S21  
289 ribosomal protein L8  
283 mitochondrial ribosomal protein L39  
247 mitochondrial ribosomal protein S17  
245 mitochondrial ribosomal protein L36  
223 mitochondrial ribosomal protein S16

---
