# Supplementary material for: Weak correlation between sequence conservation in promoter regions and in protein-coding regions of human-mouse orthologous gene pairs
Source: PubMed Central journal article supplement (PMC2335122; doi:10.1186/1471-2164-9-152), 2008-04-02
Supplement: 1471-2164-9-152-S11.pdf [file 1471-2164-9-152-S11.pdf]

Additional file 11

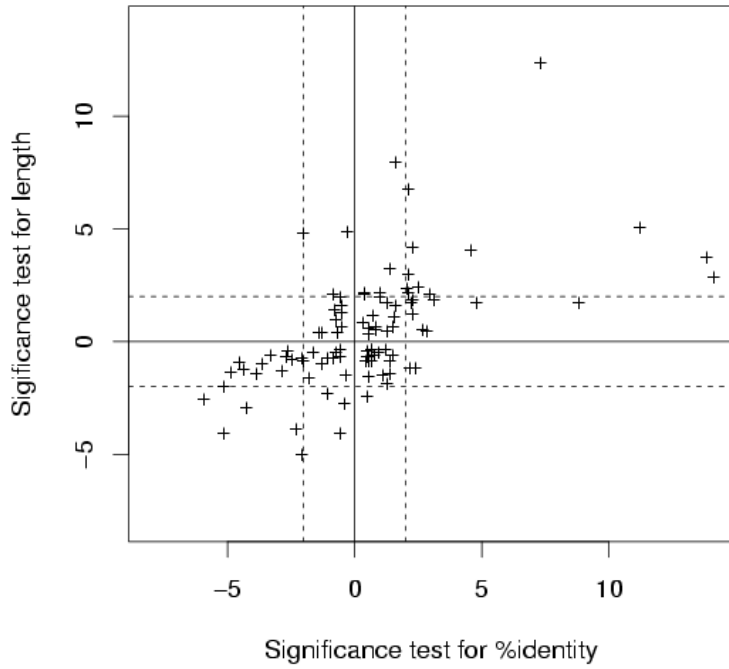

Each axis is based on the common logarithm of P-values of significance tests for each GO. Plus means high identity and minus means low identity. Dashed lines correspond to a P-value of 0.01.
